# Supplementary material for: The Flavone Cirsiliol from Salvia x jamensis Binds the F1 Moiety of ATP Synthase, Modulating Free Radical Production
Source: MDPI journal article supplement (doi:10.3390/cells11193169), 2022-10-09
Supplement: s1 [file s1]

# The Flavone Cirsiliol from *Salvia x jamensis* Binds the F<sub>1</sub> Moiety of ATP Synthase, Modulating Free Radical Production

Lavinia Carlini <sup>1</sup>, Gabriele Tancreda <sup>2</sup>, Valeria Iobbi <sup>2</sup>, Federico Caicci <sup>3</sup>, Silvia Bruno <sup>4</sup>, Alfonso Esposito <sup>5</sup>, Daniela Calzia <sup>2</sup>, Stefano Benini <sup>1</sup>, Angela Bisio <sup>2</sup>, Lucia Manni <sup>3</sup>, Anna Schito <sup>6</sup>, Carlo Enrico Traverso <sup>7</sup>, Silvia Ravera <sup>4</sup> and Isabella Panfoli <sup>2,\*</sup>

<sup>1</sup> Faculty of Science and Technology, Free University of Bolzano, Piazza Università 5, 39100 Bolzano, Italy

<sup>2</sup> Dipartimento di Farmacia (DIFAR), University of Genoa, V.le Benedetto XV 3, 16132 Genova, Italy

<sup>3</sup> Department of Biology, Università di Padova, via U. Bassi 58/B, 35121 Padova, Italy

<sup>4</sup> Department of Experimental Medicine, University of Genoa, Via De Toni 14, 16132 Genoa, Italy

<sup>5</sup> International Centre for Genetic Engineering and Biotechnology (ICGEB), 34149 Trieste, Italy

<sup>6</sup> Dipartimento di Scienze Chirurgiche e Diagnostiche Integrate (DISC), Sezione di Microbiologia, Università di Genova, Largo Rosanna Benzi 8, 16145 Genova, Italy

<sup>7</sup> Clinica Oculistica, (DINOEMI) University of Genoa, V.le Benedetto XV 6, 16132 Genova, Italy

\* Correspondence: isabella.panfoli@unige.it; Tel.: +39-0103537397

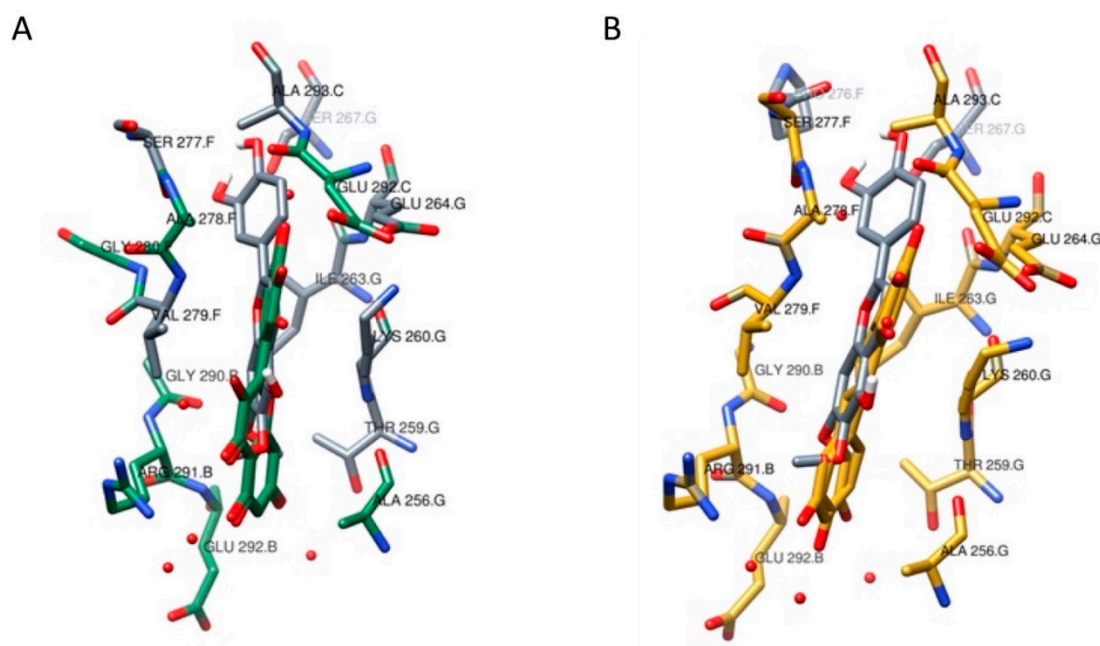

**Figure S1.** Comparison of the interacting amino acids in the binding of the three different polyphenols with bovine F<sub>1</sub> moiety of ATP synthase. (A) Major binding modes of cirsiliol (gray) and cisquercetin (green). (B) Major binding mode of cirsiliol (gray) and resveratrol (yellow). Amino acids Thr-259.G, Lys-260.G, Ile-263.G, Glu-264.G, Ser-277.F, Val-279.F, Ala-293.C and Arg-291.B are always involved in the binding. Amino acids labeled in gray are specific to cirsiliol binding.
