# Supplementary material for: The Flavone Cirsiliol from Salvia x jamensis Binds the F1 Moiety of ATP Synthase, Modulating Free Radical Production
Source: MDPI journal article supplement (doi:10.3390/cells11193169), 2022-10-09
Supplement: s1 [file s1]

Molecule Name omega\_1\_16  
Molecular Weight 330.3  
XLogP 1.2  
PSA 109.4  
Heavy Atoms 24  
Acceptor Count 7  
Donor Count 3  
Chelator Count 3  
Pose Index 1

Total Score -11.29

Score compared to other molecules

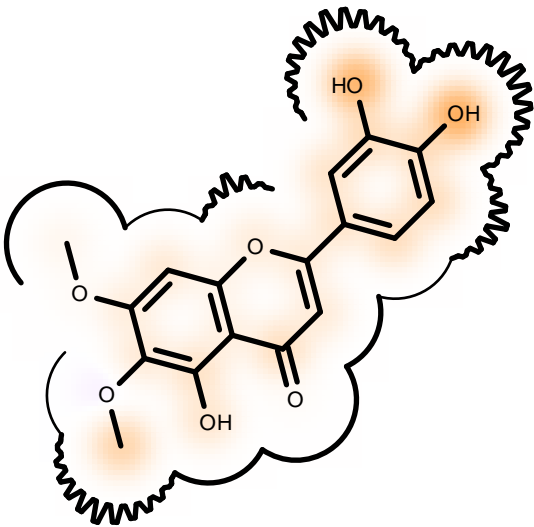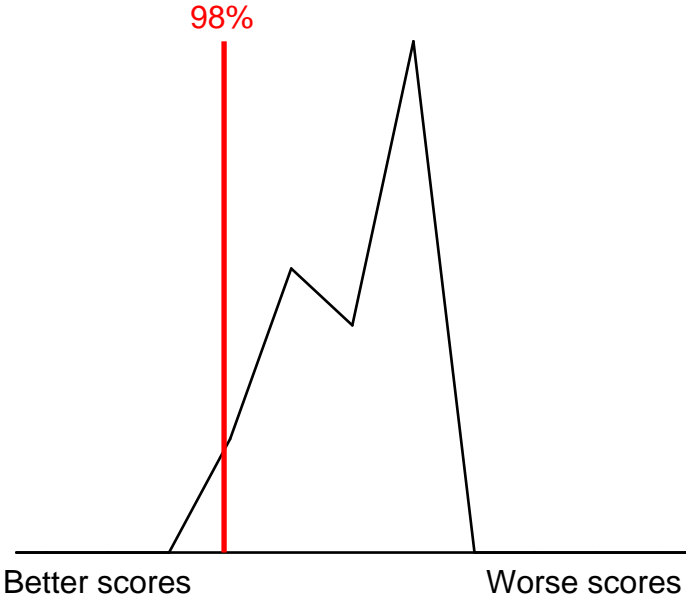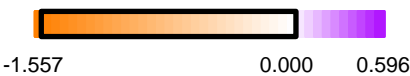

Protein Contact

Protein Cavity

Residue Fingerprint

|         |         |
|---------|---------|
| ALA256G | ALA278E |
| ALA278F | ALA293B |
| ALA293C | ALA336B |
| ARG252G | ARG291B |
| ASP316F | ASP333B |
| GLN255G | GLU264G |
| GLU292B | GLU292C |
| GLY290B | ILE263G |
| LYS260G | THR259G |
| VAL279E | VAL279F |

Shape -12.36

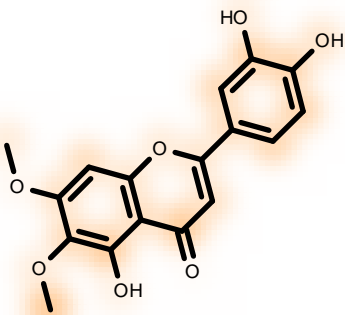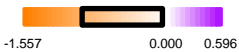

Hydrogen Bond -4.51

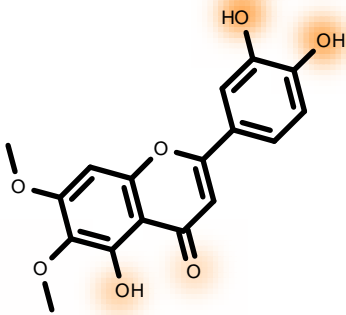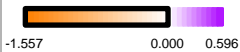

Protein Desolvation 3.09

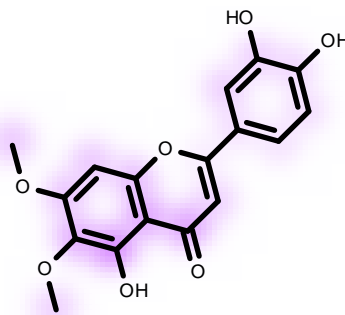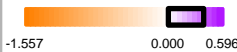

Ligand Desolvation 2.49

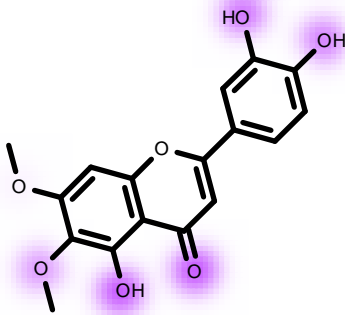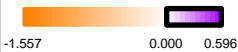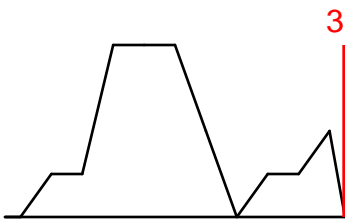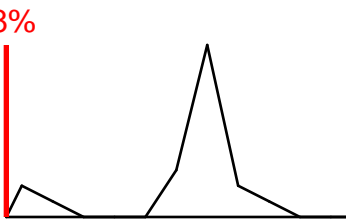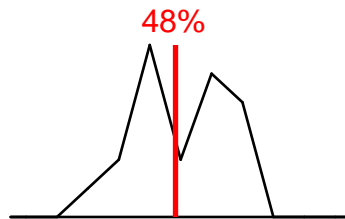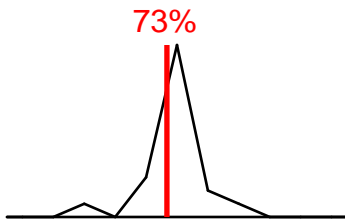

Acceptor  
Metal

Donor  
Contact

Molecule Name omega\_1\_10  
Molecular Weight 330.3  
XLogP 1.2  
PSA 109.4  
Heavy Atoms 24  
Acceptor Count 7  
Donor Count 3  
Chelator Count 3  
Pose Index 2

Total Score -11.24

Score compared to other molecules

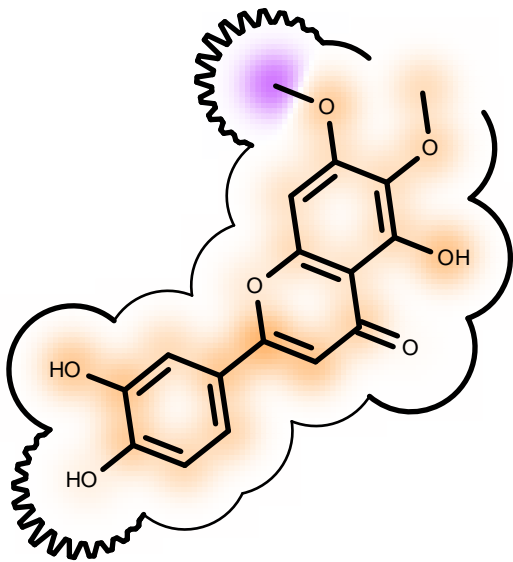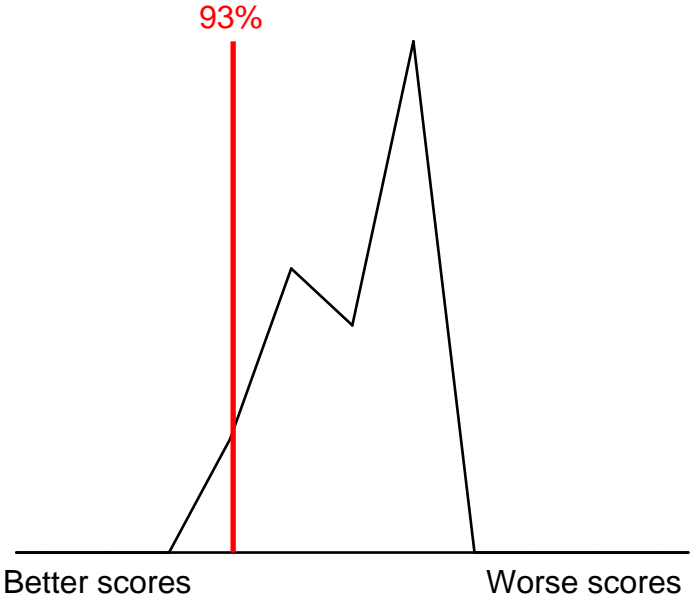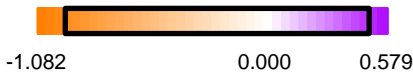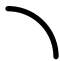

Protein Contact

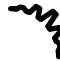

Protein Cavity

Residue Fingerprint

|                |                |
|----------------|----------------|
| ALA256G        | ALA278E        |
| ALA278F        | ALA293B        |
| ALA293C        | ALA336B        |
| ARG252G        | <b>ARG291B</b> |
| ASP316F        | ASP333B        |
| GLN255G        | <b>GLU264G</b> |
| <b>GLU292B</b> | GLU292C        |
| GLY290B        | ILE263G        |
| LYS260G        | THR259G        |
| VAL279E        | VAL279F        |

Shape -14.64

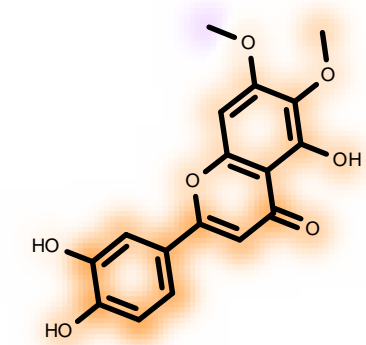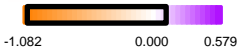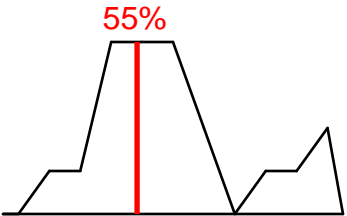

Hydrogen Bond -3.50

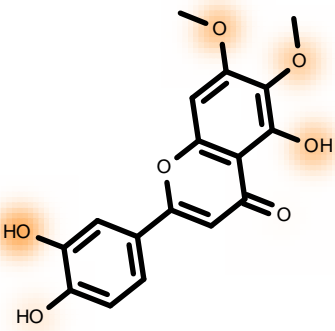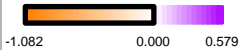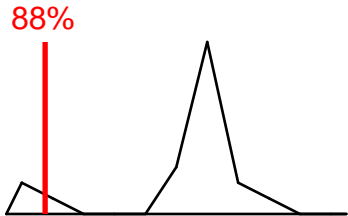

Protein Desolvation 3.91

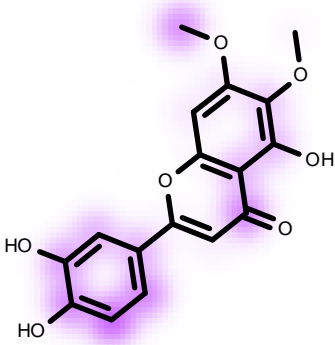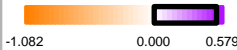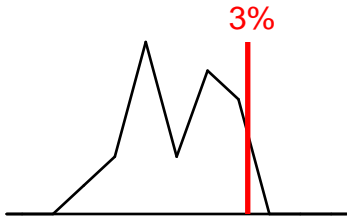

Ligand Desolvation 2.99

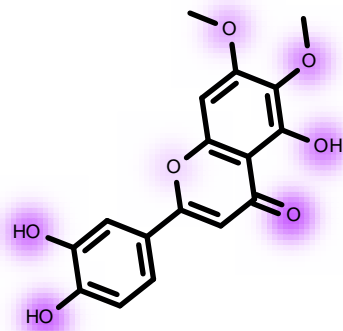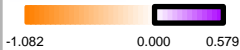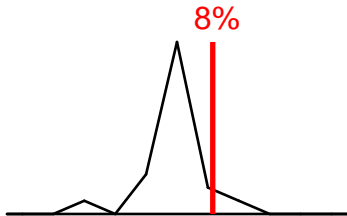

Acceptor  
Metal

Donor  
Contact

Molecule Name omega\_1\_4  
Molecular Weight 330.3  
XLogP 1.2  
PSA 109.4  
Heavy Atoms 24  
Acceptor Count 7  
Donor Count 3  
Chelator Count 3  
Pose Index 3

Total Score -10.92

Score compared to other molecules

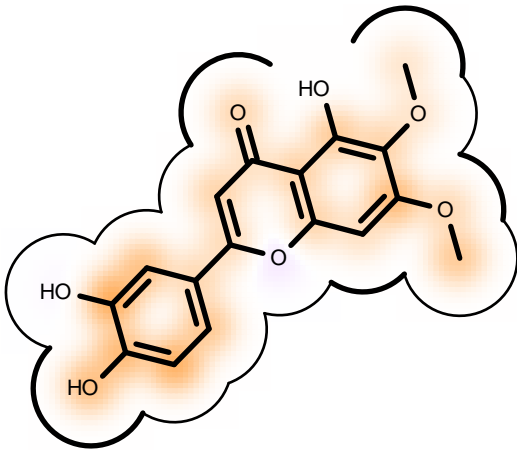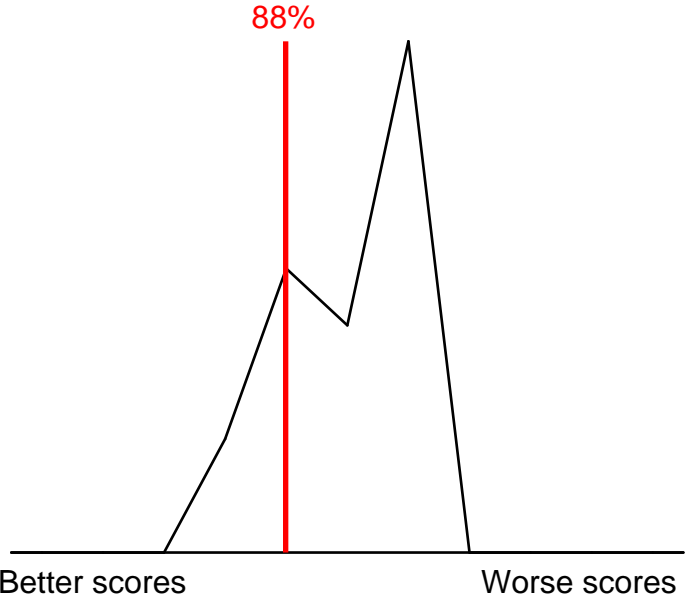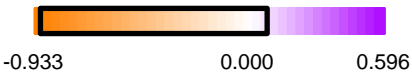

Protein Contact

Protein Cavity

Residue Fingerprint

|         |                |
|---------|----------------|
| ALA256G | ALA278E        |
| ALA278F | ALA293B        |
| ALA293C | ALA336B        |
| ARG252G | ARG291B        |
| ASP316F | ASP333B        |
| GLN255G | GLU264G        |
| GLU292B | GLU292C        |
| GLY290B | ILE263G        |
| LYS260G | <b>THR259G</b> |
| VAL279E | <b>VAL279F</b> |

Shape -14.71

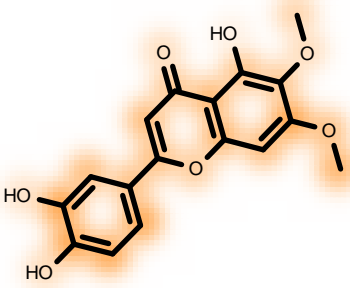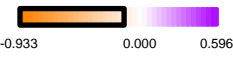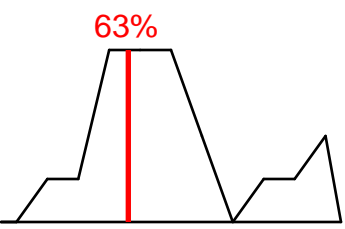

Hydrogen Bond -1.59

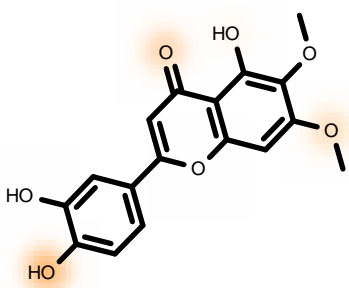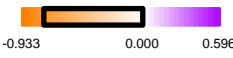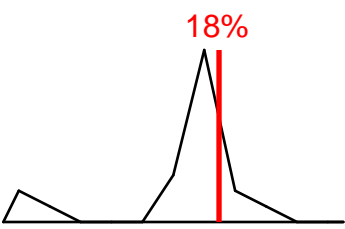

Protein Desolvation 2.93

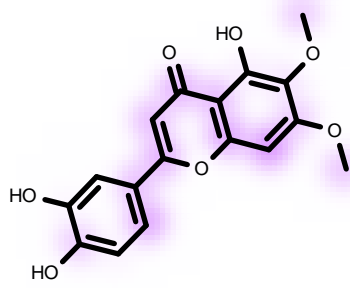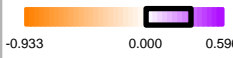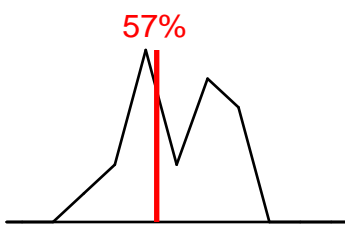

Ligand Desolvation 2.45

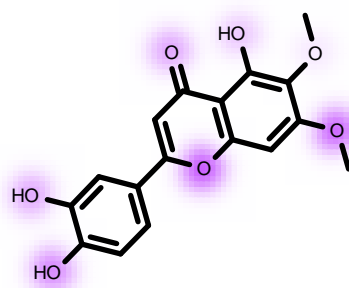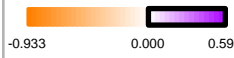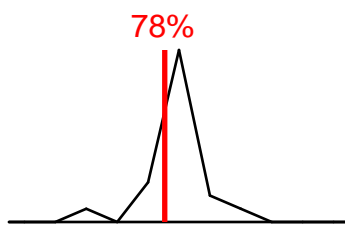

Acceptor  
Metal

Donor  
Contact

Molecule Name omega\_1\_13  
Molecular Weight 330.3  
XLogP 1.2  
PSA 109.4  
Heavy Atoms 24  
Acceptor Count 7  
Donor Count 3  
Chelator Count 3  
Pose Index 4

Total Score -10.90

Score compared to other molecules

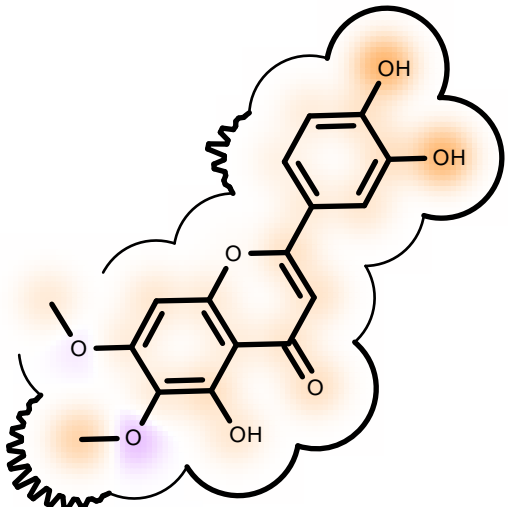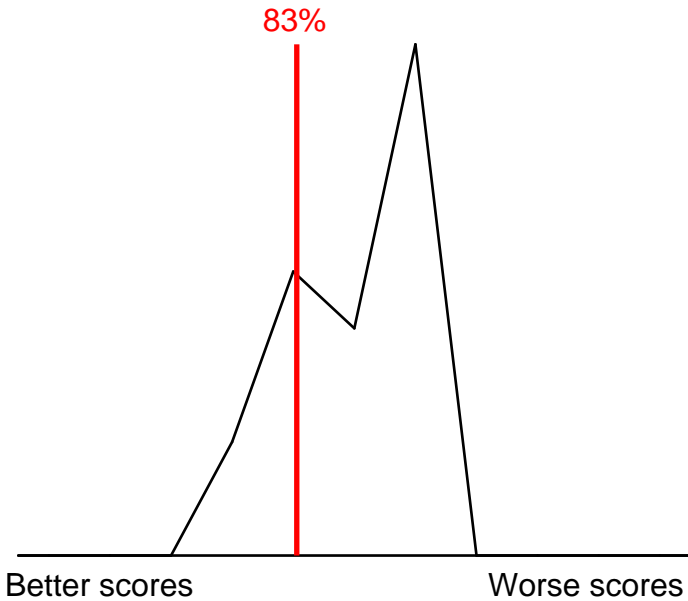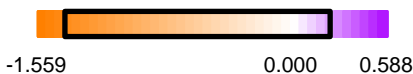

Protein Contact

Protein Cavity

Residue Fingerprint

|         |         |
|---------|---------|
| ALA256G | ALA278E |
| ALA278F | ALA293B |
| ALA293C | ALA336B |
| ARG252G | ARG291B |
| ASP316F | ASP333B |
| GLN255G | GLU264G |
| GLU292B | GLU292C |
| GLY290B | ILE263G |
| LYS260G | THR259G |
| VAL279E | VAL279F |

Shape -12.59

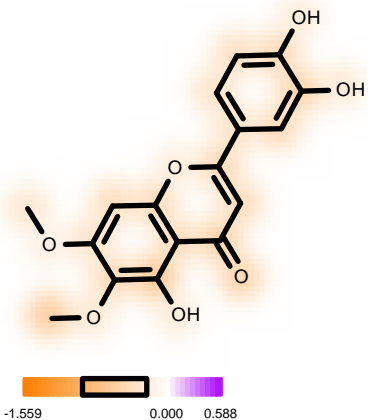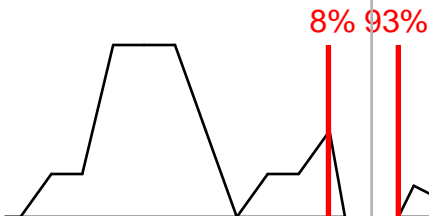

Hydrogen Bond -4.19

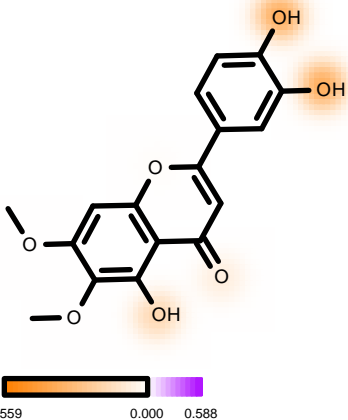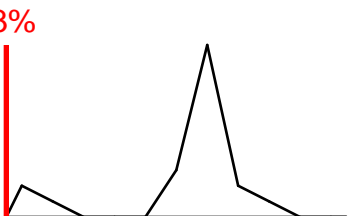

Protein Desolvation 2.75

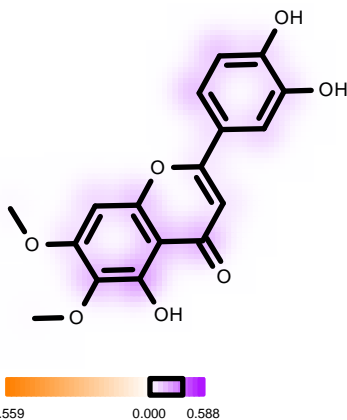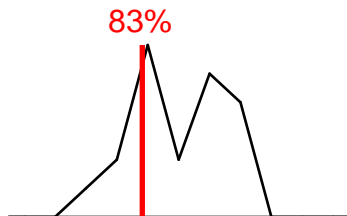

Ligand Desolvation 3.13

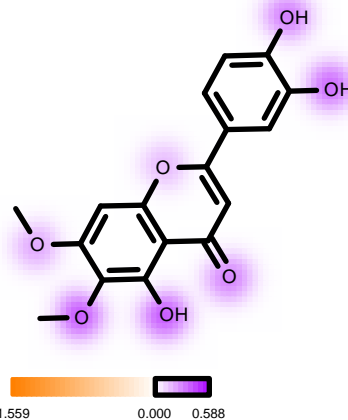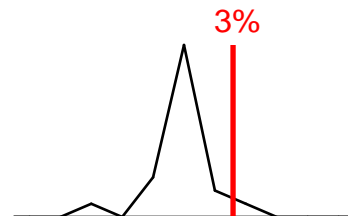

Acceptor  
Metal

Donor  
Contact

Molecule Name omega\_1\_14  
Molecular Weight 330.3  
XLogP 1.2  
PSA 109.4  
Heavy Atoms 24  
Acceptor Count 7  
Donor Count 3  
Chelator Count 3  
Pose Index 5

Total Score -10.80

Score compared to other molecules

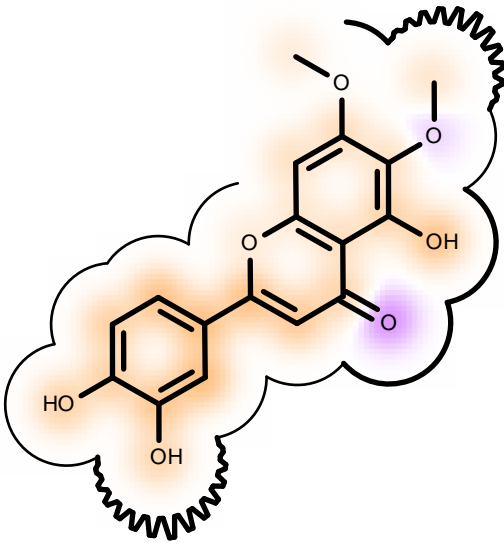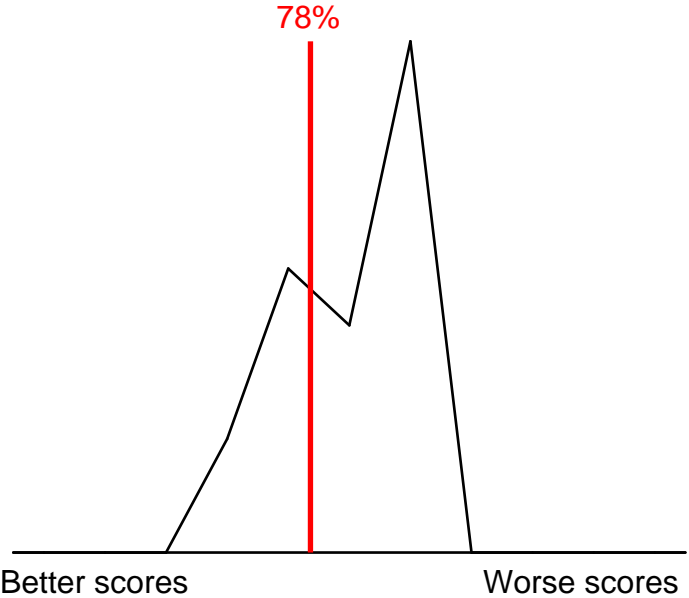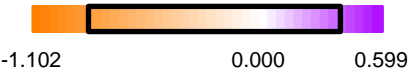

Protein Contact

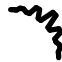

Protein Cavity

Residue Fingerprint

|                |                |
|----------------|----------------|
| ALA256G        | ALA278E        |
| ALA278F        | ALA293B        |
| ALA293C        | ALA336B        |
| ARG252G        | ARG291B        |
| ASP316F        | ASP333B        |
| GLN255G        | <b>GLU264G</b> |
| <b>GLU292B</b> | GLU292C        |
| GLY290B        | ILE263G        |
| <b>LYS260G</b> | THR259G        |
| VAL279E        | VAL279F        |

Shape -15.27

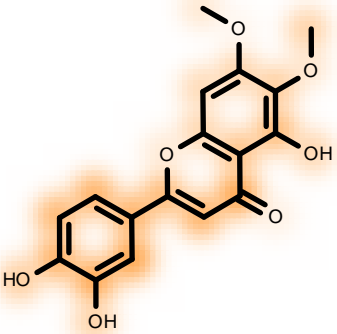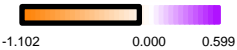

93%

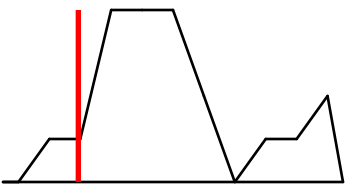

Hydrogen Bond -1.86

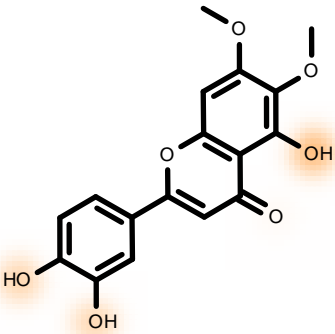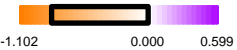

57%

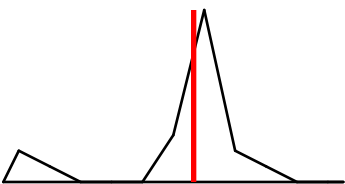

Protein Desolvation 3.65

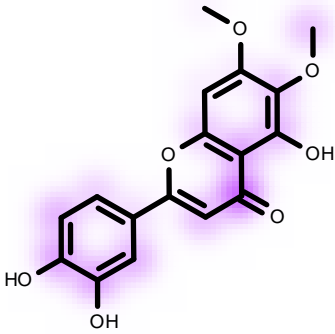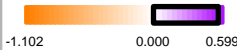

18%

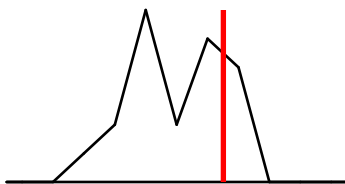

Ligand Desolvation 2.69

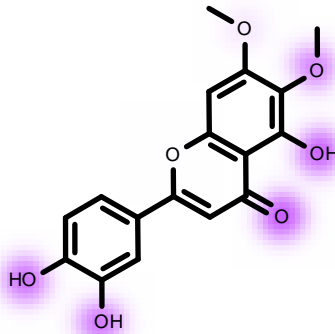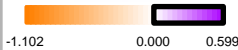

38%

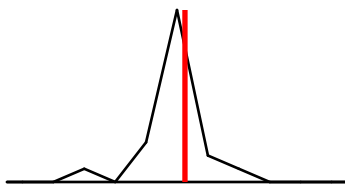

Acceptor  
Metal

Donor  
Contact

Molecule Name      omega\_1\_12  
Molecular Weight    330.3  
XLogP                1.2  
PSA                  109.4  
Heavy Atoms        24  
Acceptor Count     7  
Donor Count        3  
Chelator Count     3  
Pose Index          6

Total Score    -10.75

Score compared to other molecules

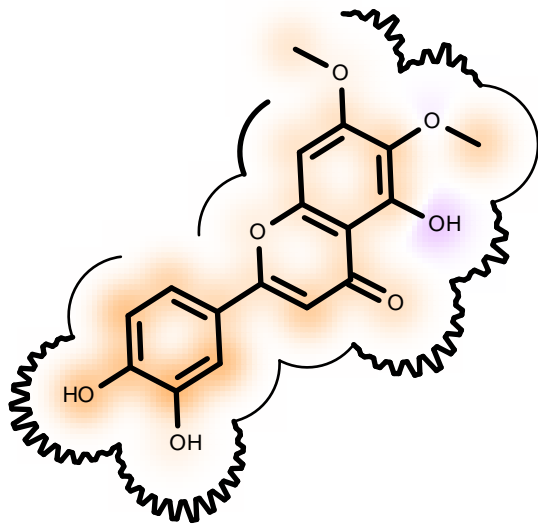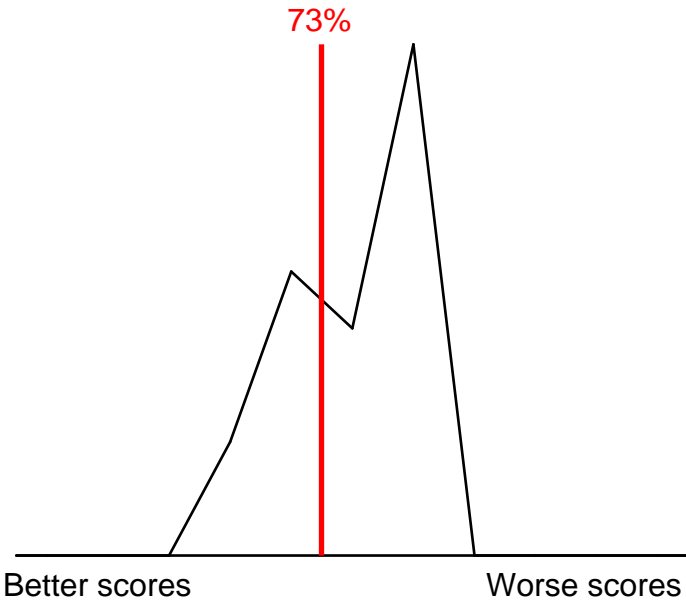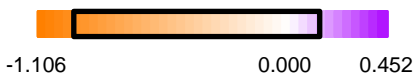

Protein Contact      Protein Cavity

Residue Fingerprint

|         |                |
|---------|----------------|
| ALA256G | ALA278E        |
| ALA278F | ALA293B        |
| ALA293C | ALA336B        |
| ARG252G | ARG291B        |
| ASP316F | ASP333B        |
| GLN255G | GLU264G        |
| GLU292B | GLU292C        |
| GLY290B | ILE263G        |
| LYS260G | <b>THR259G</b> |
| VAL279E | <b>VAL279F</b> |

Shape    -14.16

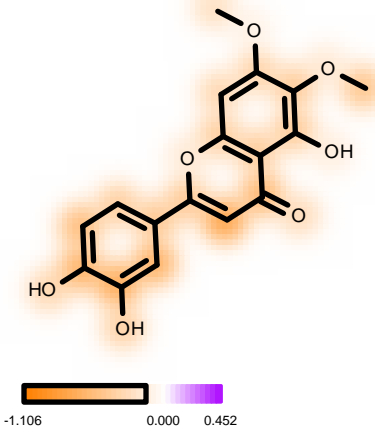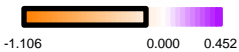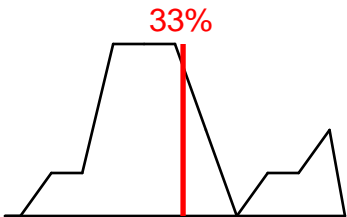

Hydrogen Bond    -1.56

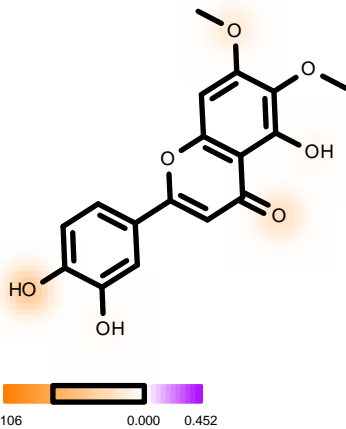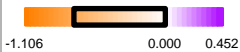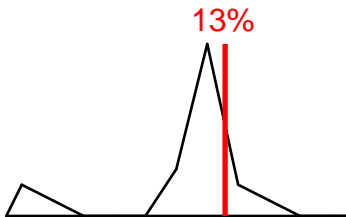

Protein Desolvation    2.62

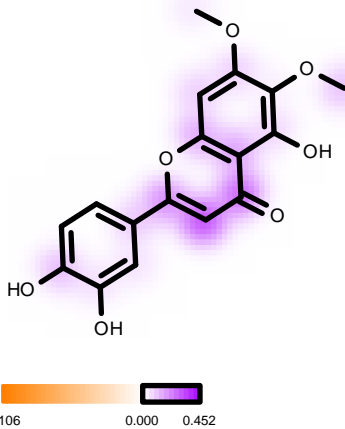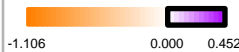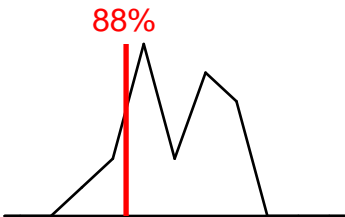

Ligand Desolvation    2.34

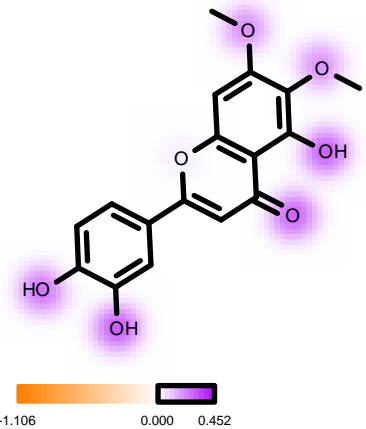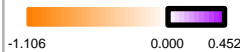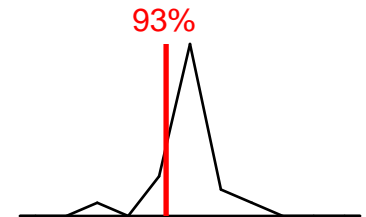

Acceptor      Donor  
Metal        Contact

Molecule Name omega\_1\_12  
Molecular Weight 330.3  
XLogP 1.2  
PSA 109.4  
Heavy Atoms 24  
Acceptor Count 7  
Donor Count 3  
Chelator Count 3  
Pose Index 7

Total Score -10.75

Score compared to other molecules

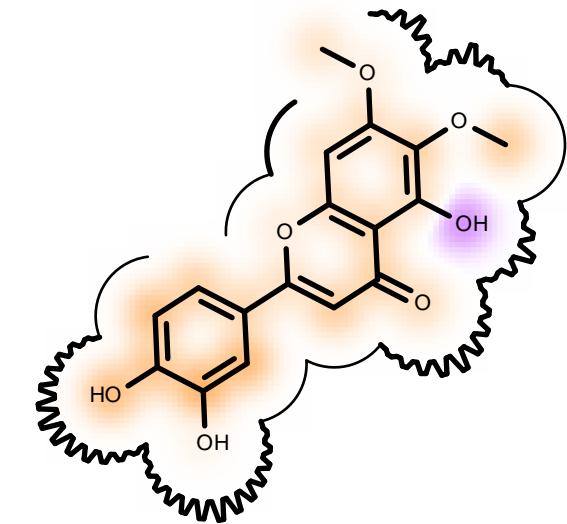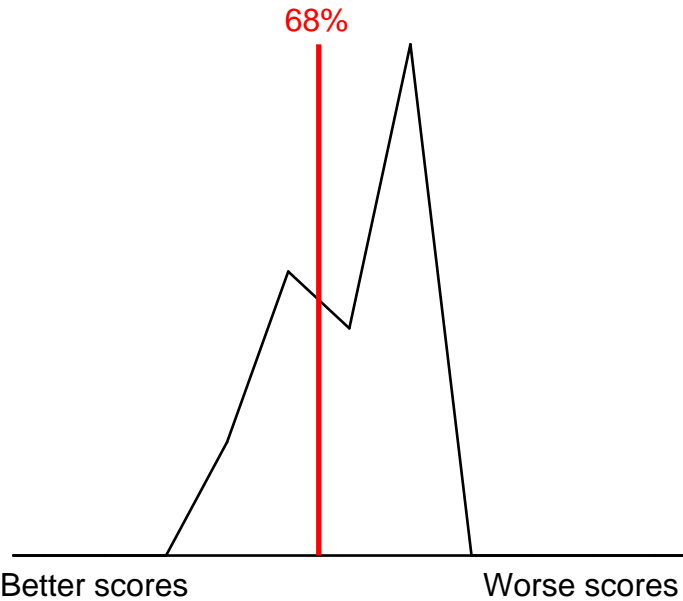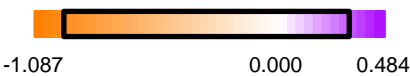

Protein Contact Protein Cavity

Residue Fingerprint

|         |         |
|---------|---------|
| ALA256G | ALA278E |
| ALA278F | ALA293B |
| ALA293C | ALA336B |
| ARG252G | ARG291B |
| ASP316F | ASP333B |
| GLN255G | GLU264G |
| GLU292B | GLU292C |
| GLY290B | ILE263G |
| LYS260G | THR259G |
| VAL279E | VAL279F |

Shape -14.38

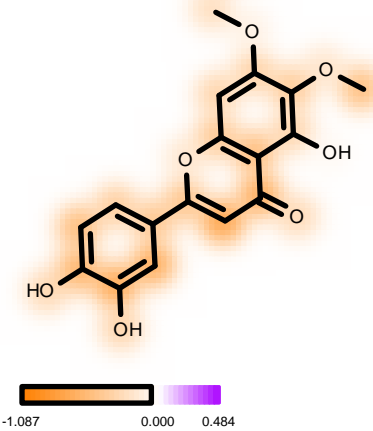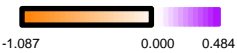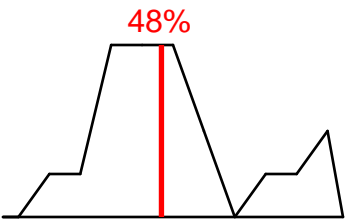

Hydrogen Bond -1.60

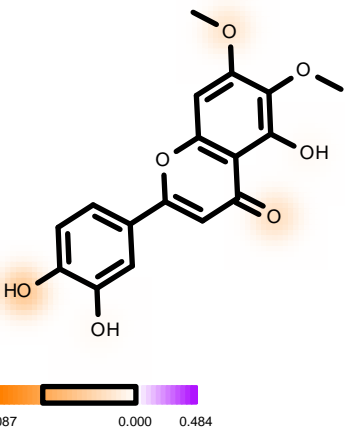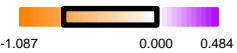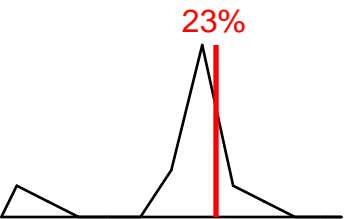

Protein Desolvation 2.82

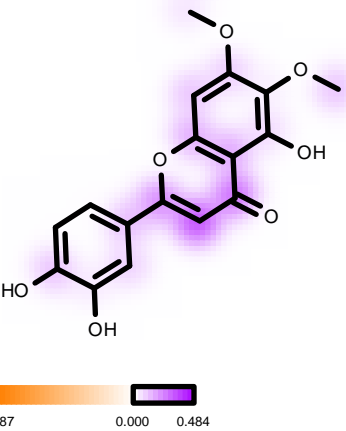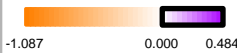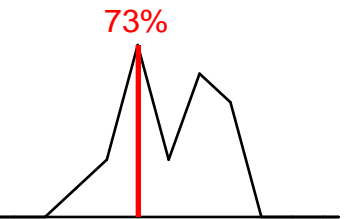

Ligand Desolvation 2.41

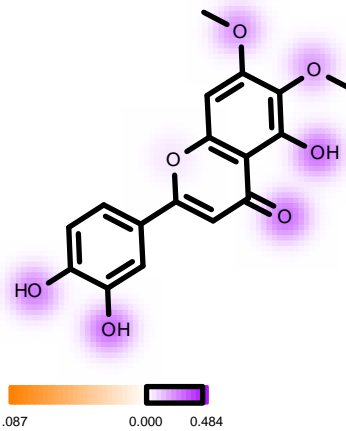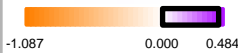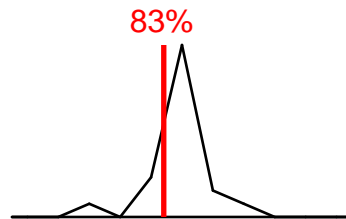

Acceptor Donor  
Metal Contact

Molecule Name omega\_1\_16  
Molecular Weight 330.3  
XLogP 1.2  
PSA 109.4  
Heavy Atoms 24  
Acceptor Count 7  
Donor Count 3  
Chelator Count 3  
Pose Index 8

Total Score -10.74

Score compared to other molecules

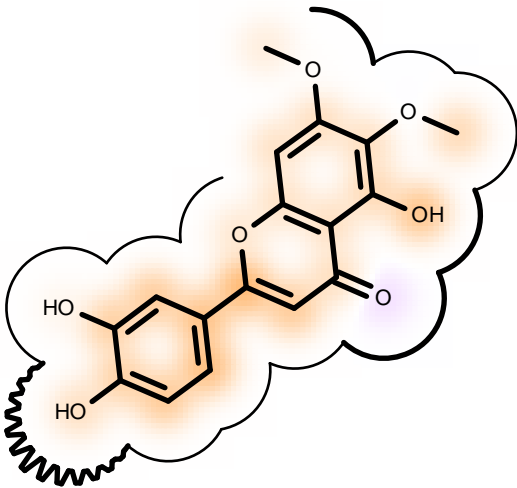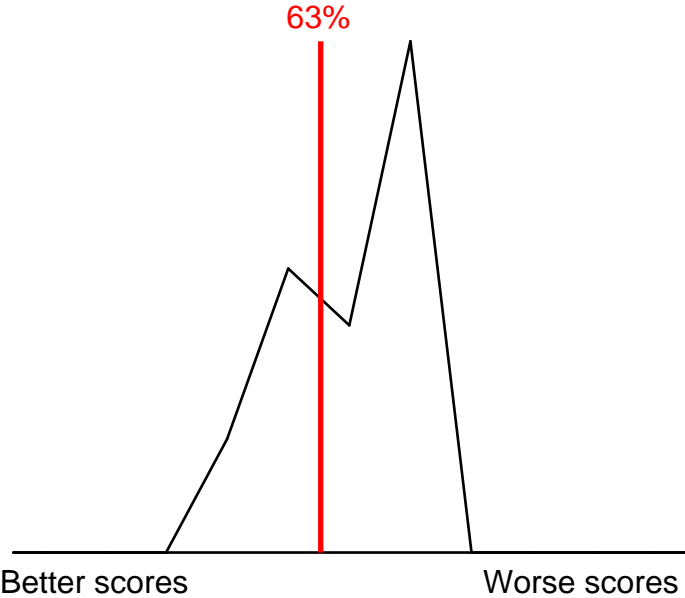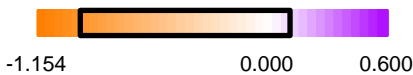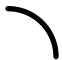

Protein Contact

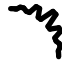

Protein Cavity

Residue Fingerprint

|                |                |
|----------------|----------------|
| ALA256G        | ALA278E        |
| ALA278F        | <b>ALA293B</b> |
| ALA293C        | ALA336B        |
| ARG252G        | ARG291B        |
| ASP316F        | ASP333B        |
| GLN255G        | GLU264G        |
| <b>GLU292B</b> | GLU292C        |
| GLY290B        | ILE263G        |
| LYS260G        | THR259G        |
| VAL279E        | VAL279F        |

Shape -15.55

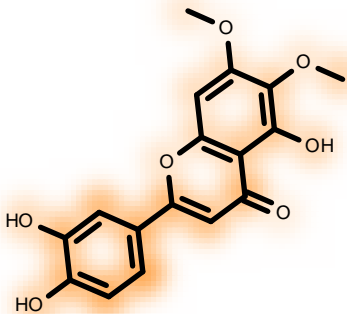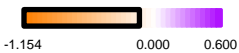

95%

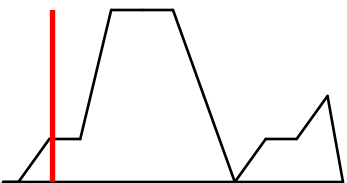

Hydrogen Bond -1.65

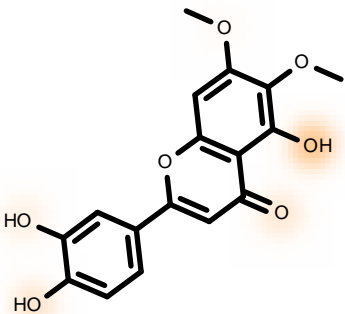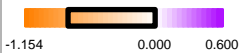

33%

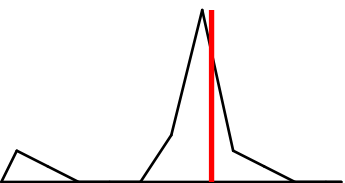

Protein Desolvation 3.74

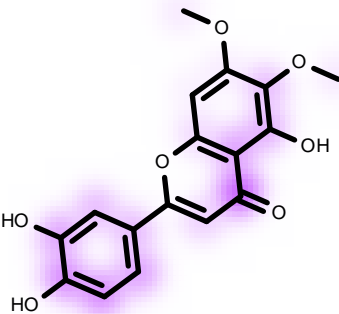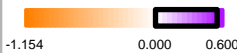

13%

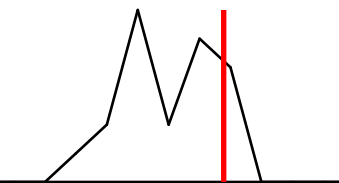

Ligand Desolvation 2.72

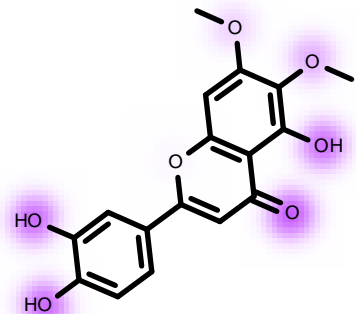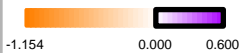

33%

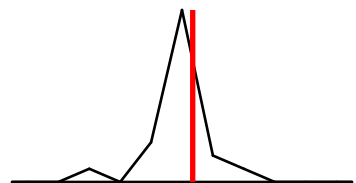

Acceptor  
Metal

Donor  
Contact



Molecule Name omega\_1\_16  
Molecular Weight 330.3  
XLogP 1.2  
PSA 109.4  
Heavy Atoms 24  
Acceptor Count 7  
Donor Count 3  
Chelator Count 3  
Pose Index 9

Total Score -10.70

Score compared to other molecules

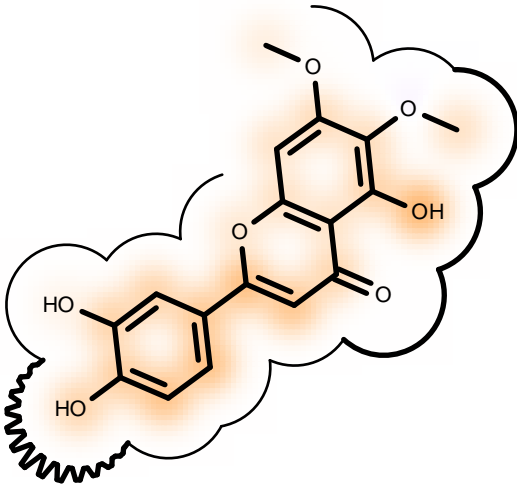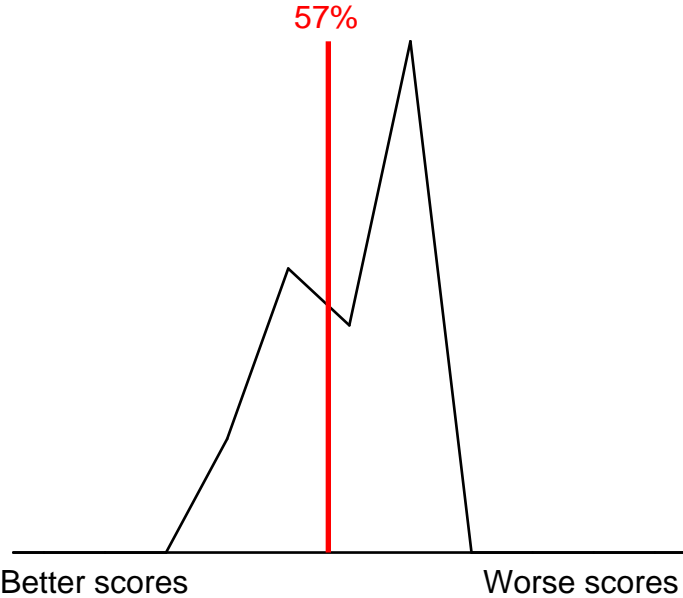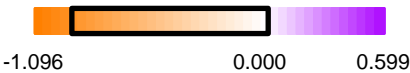

Protein Contact Protein Cavity

Residue Fingerprint

|         |         |
|---------|---------|
| ALA256G | ALA278E |
| ALA278F | ALA293B |
| ALA293C | ALA336B |
| ARG252G | ARG291B |
| ASP316F | ASP333B |
| GLN255G | GLU264G |
| GLU292B | GLU292C |
| GLY290B | ILE263G |
| LYS260G | THR259G |
| VAL279E | VAL279F |

Shape -14.83

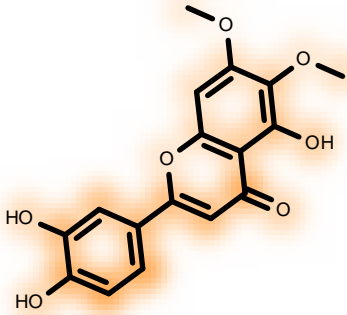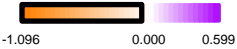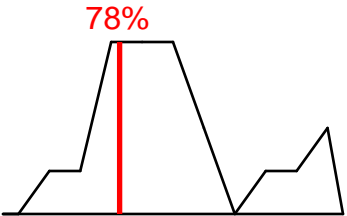

Hydrogen Bond -1.82

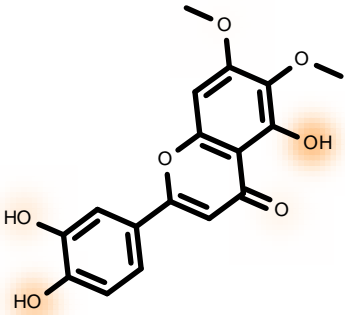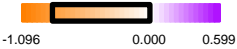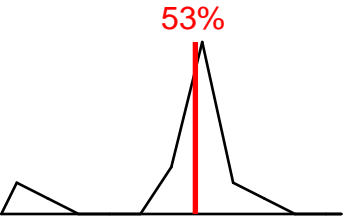

Protein Desolvation 3.35

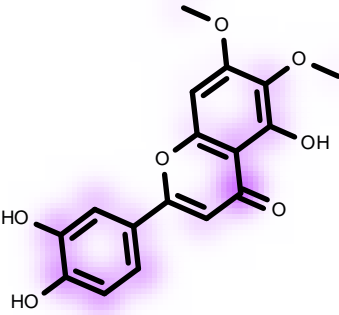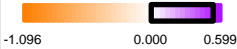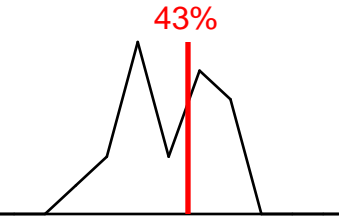

Ligand Desolvation 2.60

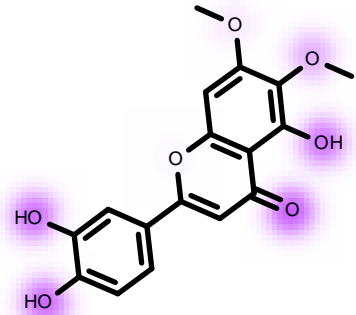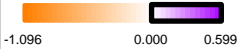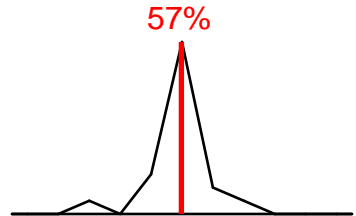

Acceptor Metal Donor Contact

Molecule Name      omega\_1\_14  
Molecular Weight    330.3  
XLogP                1.2  
PSA                  109.4  
Heavy Atoms        24  
Acceptor Count     7  
Donor Count        3  
Chelator Count     3  
Pose Index          10

Total Score    -10.64

Score compared to other molecules

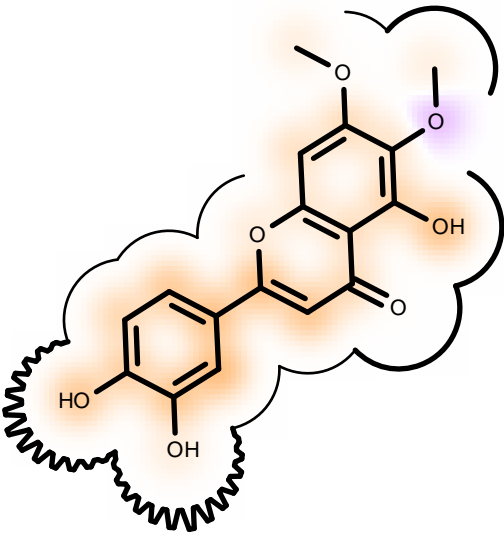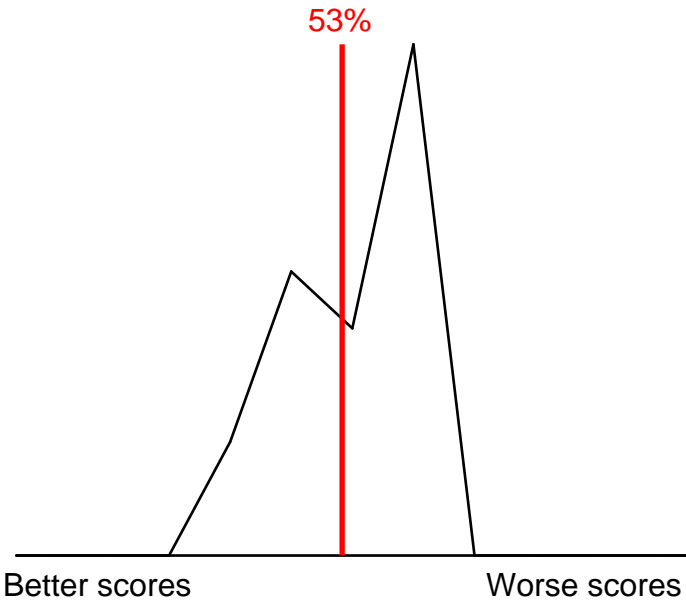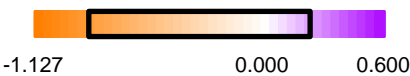

Protein Contact

Protein Cavity

Residue Fingerprint

|                |                |
|----------------|----------------|
| ALA256G        | ALA278E        |
| ALA278F        | <b>ALA293B</b> |
| ALA293C        | ALA336B        |
| ARG252G        | ARG291B        |
| ASP316F        | ASP333B        |
| GLN255G        | <b>GLU264G</b> |
| <b>GLU292B</b> | GLU292C        |
| GLY290B        | ILE263G        |
| <b>LYS260G</b> | THR259G        |
| VAL279E        | VAL279F        |

Shape    -14.85

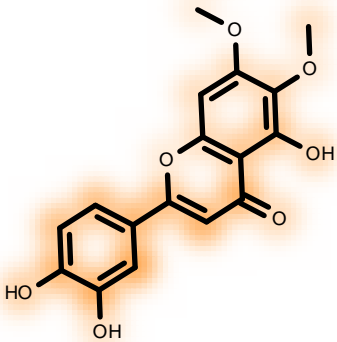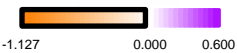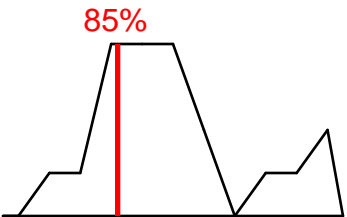

Hydrogen Bond    -1.89

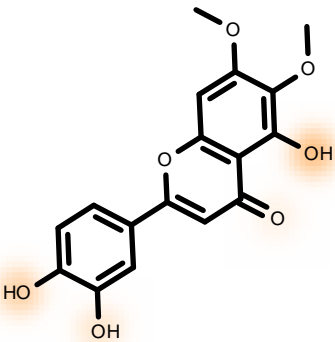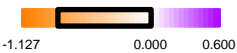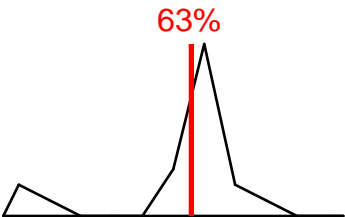

Protein Desolvation    3.48

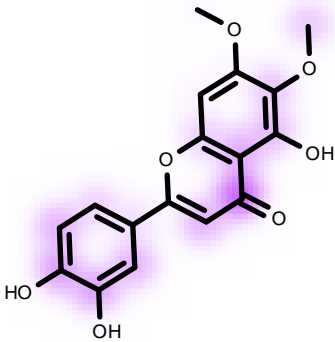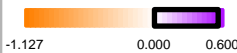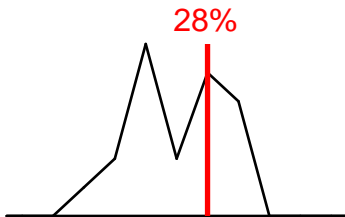

Ligand Desolvation    2.62

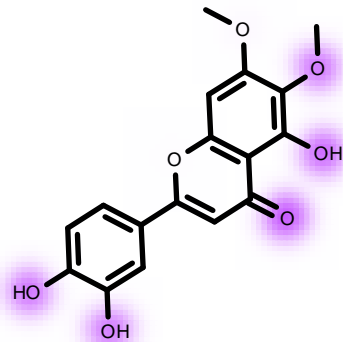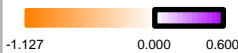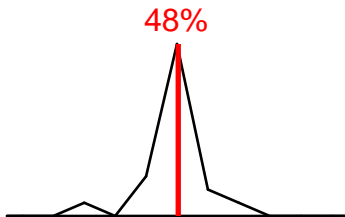

Acceptor      Donor  
Metal        Contact

Molecule Name      omega\_1\_16  
Molecular Weight    330.3  
XLogP                1.2  
PSA                  109.4  
Heavy Atoms         24  
Acceptor Count      7  
Donor Count         3  
Chelator Count      3  
Pose Index           11

Total Score    -10.62

Score compared to other molecules

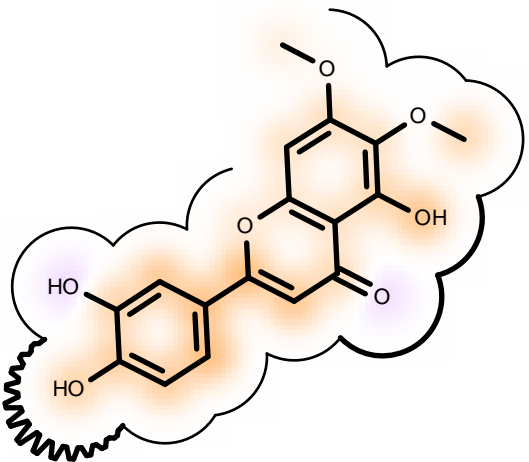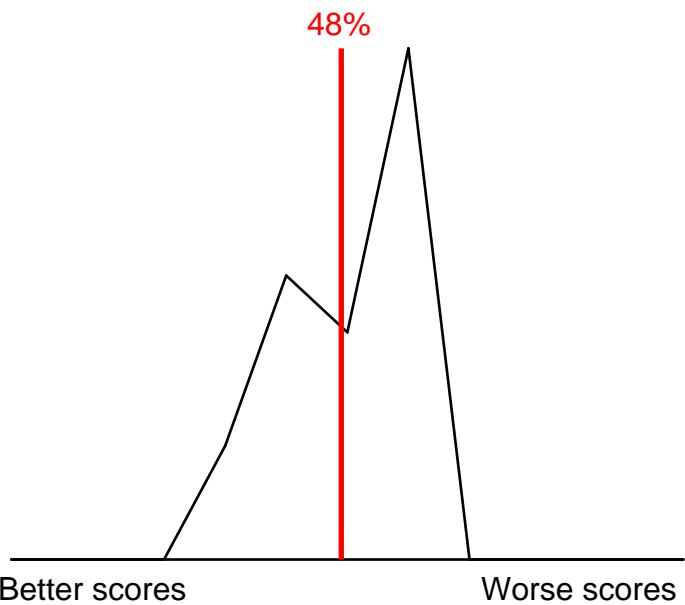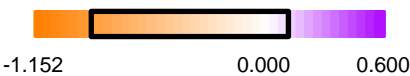

 Protein Contact       Protein Cavity

Residue Fingerprint

|                |                |
|----------------|----------------|
| ALA256G        | ALA278E        |
| ALA278F        | <b>ALA293B</b> |
| ALA293C        | ALA336B        |
| ARG252G        | ARG291B        |
| ASP316F        | ASP333B        |
| GLN255G        | <b>GLU264G</b> |
| <b>GLU292B</b> | GLU292C        |
| GLY290B        | ILE263G        |
| LYS260G        | THR259G        |
| VAL279E        | VAL279F        |

Shape    -15.04

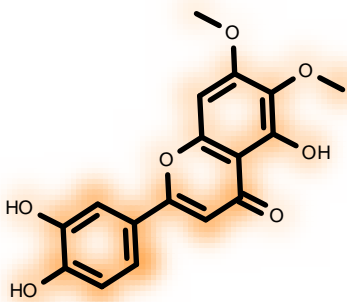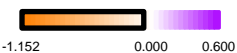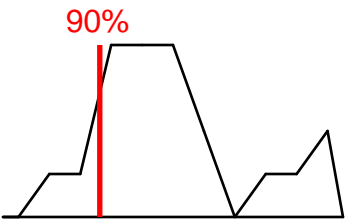

Hydrogen Bond    -1.72

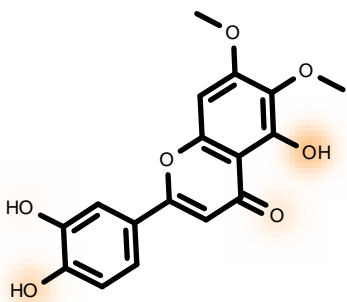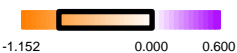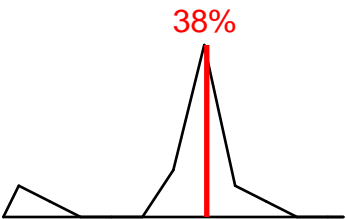

Protein Desolvation    3.59

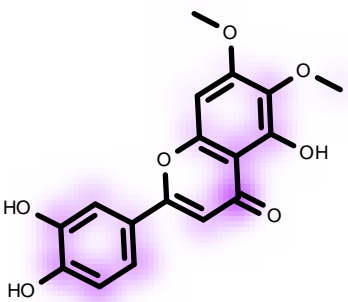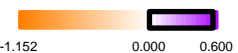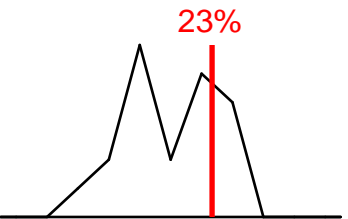

Ligand Desolvation    2.55

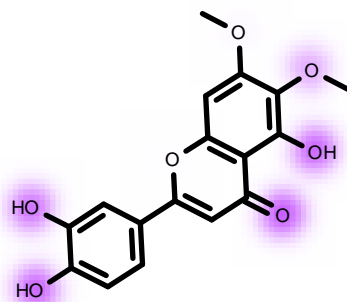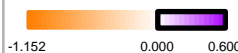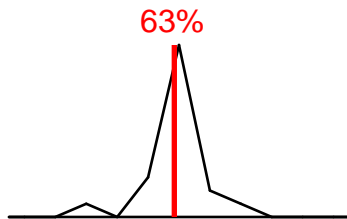

**Acceptor**      **Donor**  
**Metal**      Contact

Molecule Name      omega\_1\_16  
Molecular Weight    330.3  
XLogP                1.2  
PSA                  109.4  
Heavy Atoms        24  
Acceptor Count     7  
Donor Count        3  
Chelator Count     3  
Pose Index          12

Total Score    -10.36

Score compared to other molecules

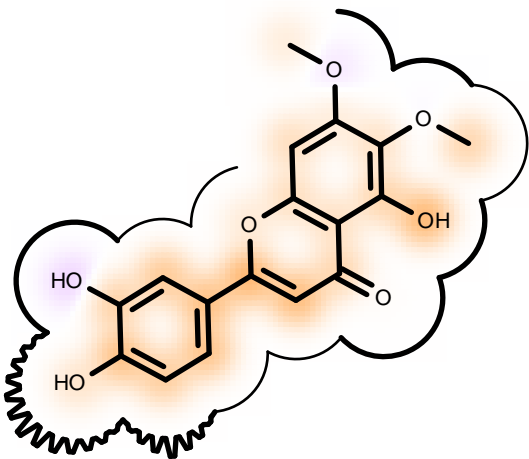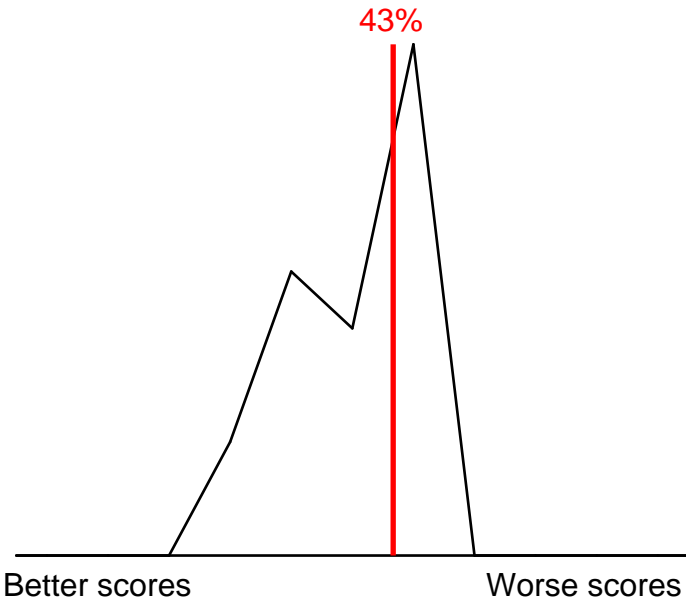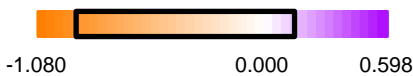

 Protein Contact       Protein Cavity

Residue Fingerprint

|                |                |
|----------------|----------------|
| ALA256G        | ALA278E        |
| ALA278F        | ALA293B        |
| ALA293C        | ALA336B        |
| ARG252G        | ARG291B        |
| ASP316F        | ASP333B        |
| GLN255G        | <b>GLU264G</b> |
| <b>GLU292B</b> | GLU292C        |
| GLY290B        | ILE263G        |
| LYS260G        | THR259G        |
| VAL279E        | VAL279F        |

Shape    -14.82

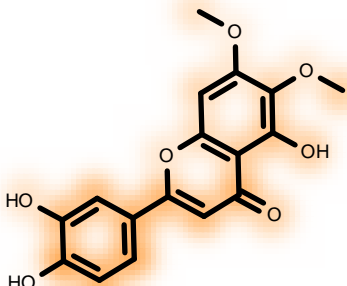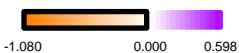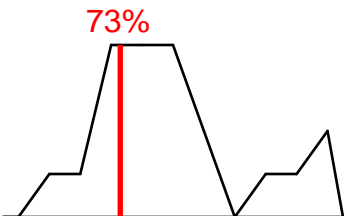

Hydrogen Bond    -1.89

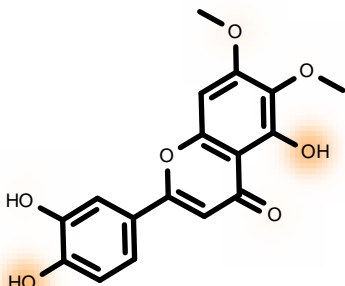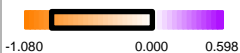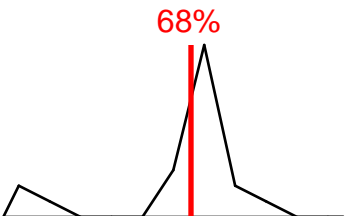

Protein Desolvation    3.38

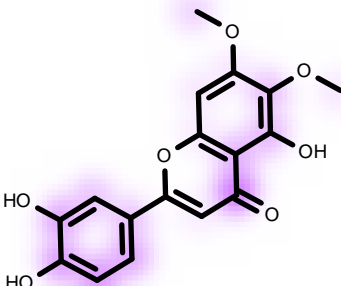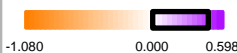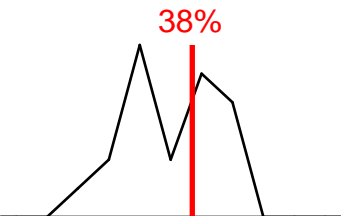

Ligand Desolvation    2.97

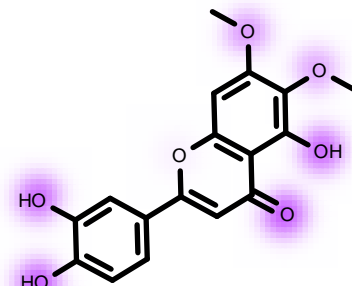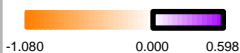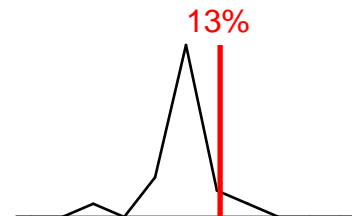

**Acceptor**      **Donor**  
**Metal**      Contact

Molecule Name      omega\_1\_2  
Molecular Weight    330.3  
XLogP                1.2  
PSA                  109.4  
Heavy Atoms        24  
Acceptor Count     7  
Donor Count        3  
Chelator Count     3  
Pose Index          13

Total Score    -10.35

Score compared to other molecules

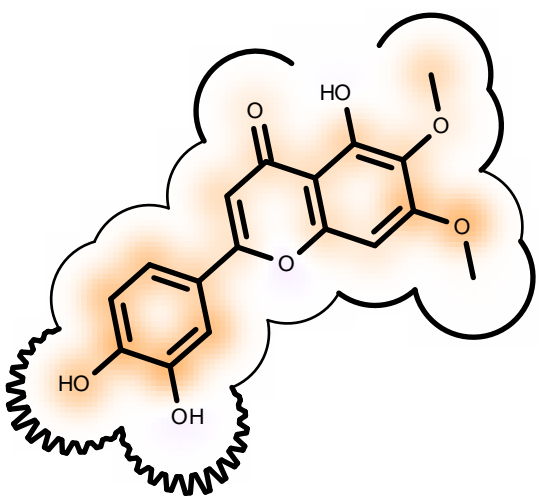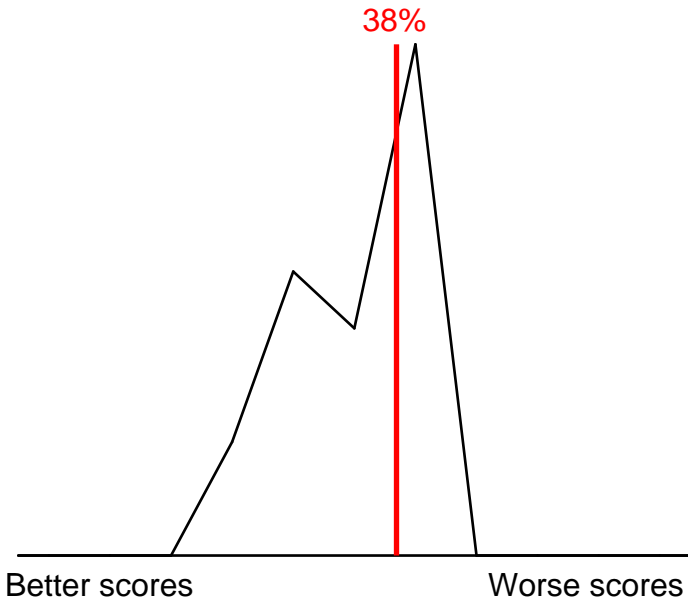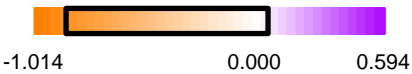

Protein Contact      Protein Cavity

Residue Fingerprint

|         |                |
|---------|----------------|
| ALA256G | ALA278E        |
| ALA278F | ALA293B        |
| ALA293C | ALA336B        |
| ARG252G | ARG291B        |
| ASP316F | ASP333B        |
| GLN255G | GLU264G        |
| GLU292B | GLU292C        |
| GLY290B | ILE263G        |
| LYS260G | <b>THR259G</b> |
| VAL279E | <b>VAL279F</b> |

Shape    -14.17

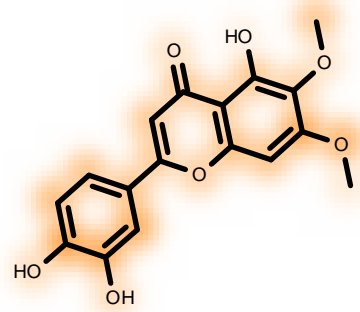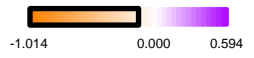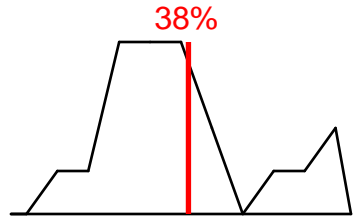

Hydrogen Bond    -1.61

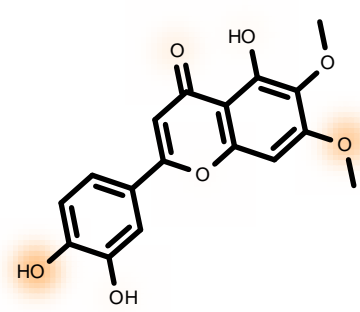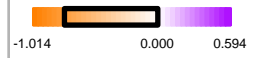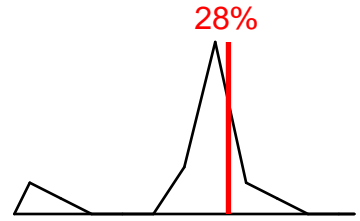

Protein Desolvation    2.78

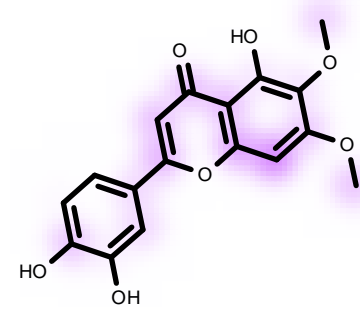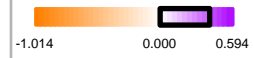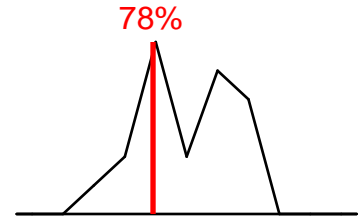

Ligand Desolvation    2.64

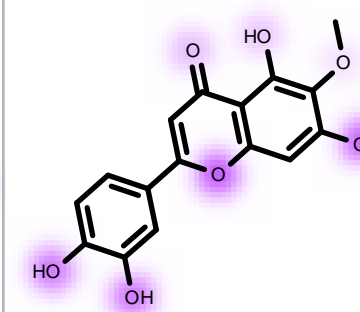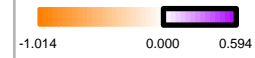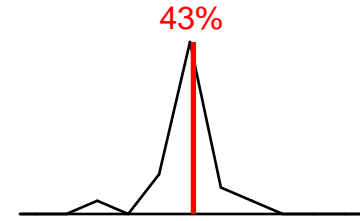

Acceptor      Donor  
Metal        Contact

Molecule Name      omega\_1\_16  
Molecular Weight    330.3  
XLogP                1.2  
PSA                  109.4  
Heavy Atoms        24  
Acceptor Count     7  
Donor Count        3  
Chelator Count     3  
Pose Index          14

Total Score    -10.32

Score compared to other molecules

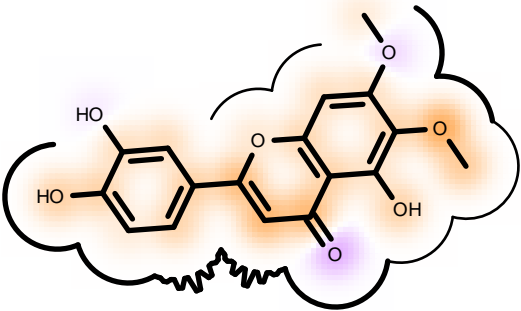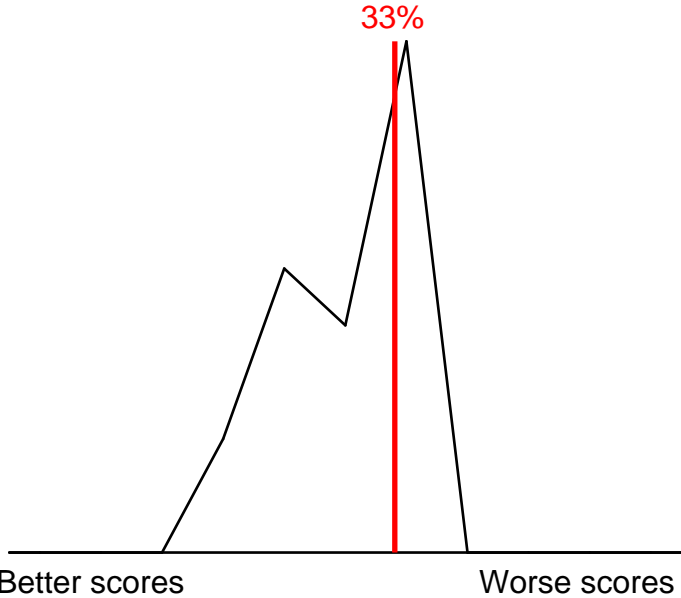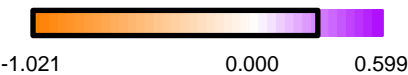

 Protein Contact       Protein Cavity

Residue Fingerprint

|                |                |
|----------------|----------------|
| ALA256G        | ALA278E        |
| ALA278F        | ALA293B        |
| ALA293C        | ALA336B        |
| ARG252G        | ARG291B        |
| ASP316F        | ASP333B        |
| GLN255G        | GLU264G        |
| <b>GLU292B</b> | <b>GLU292C</b> |
| <b>GLY290B</b> | ILE263G        |
| LYS260G        | THR259G        |
| VAL279E        | VAL279F        |

Shape    -12.78

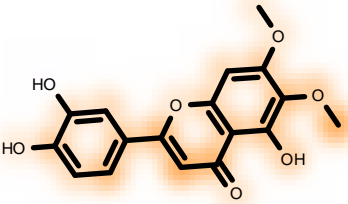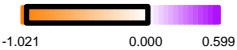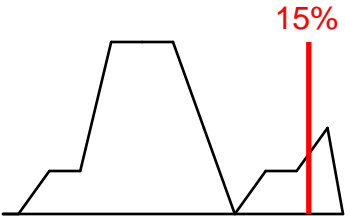

Hydrogen Bond    -2.07

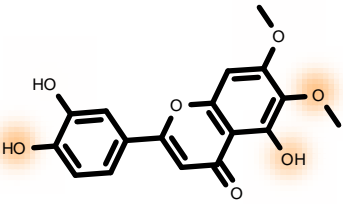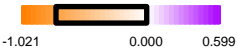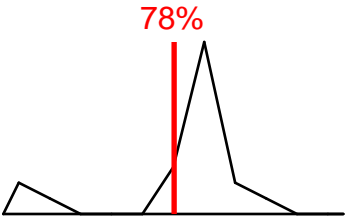

Protein Desolvation    2.18

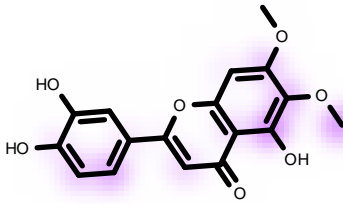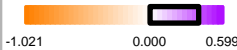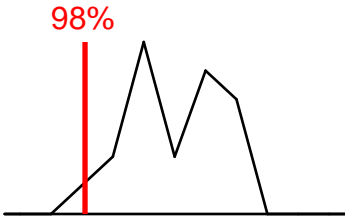

Ligand Desolvation    2.37

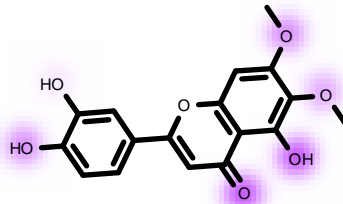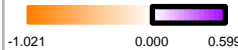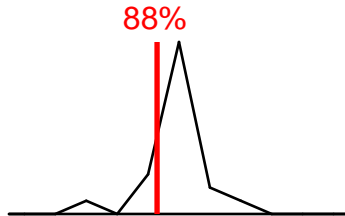

**Acceptor**      **Donor**  
**Metal**      Contact

Molecule Name omega\_1\_13  
Molecular Weight 330.3  
XLogP 1.2  
PSA 109.4  
Heavy Atoms 24  
Acceptor Count 7  
Donor Count 3  
Chelator Count 3  
Pose Index 15

Total Score -10.30

Score compared to other molecules

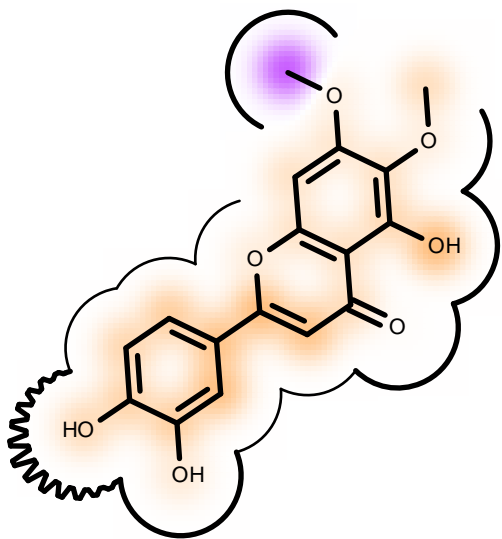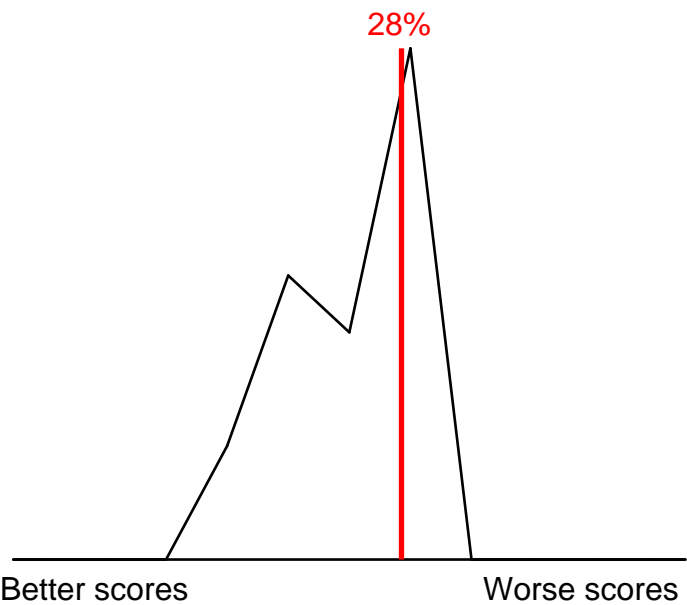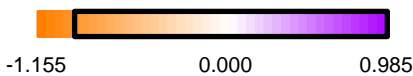

Protein Contact

Protein Cavity

Residue Fingerprint

|         |         |
|---------|---------|
| ALA256G | ALA278E |
| ALA278F | ALA293B |
| ALA293C | ALA336B |
| ARG252G | ARG291B |
| ASP316F | ASP333B |
| GLN255G | GLU264G |
| GLU292B | GLU292C |
| GLY290B | ILE263G |
| LYS260G | THR259G |
| VAL279E | VAL279F |

Shape -14.74

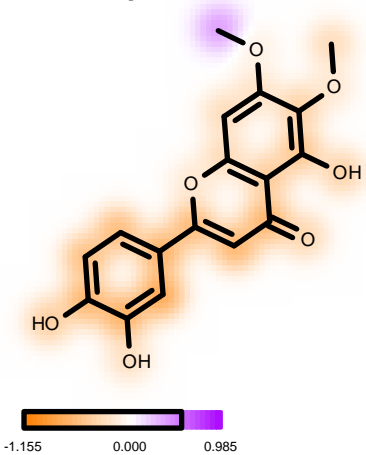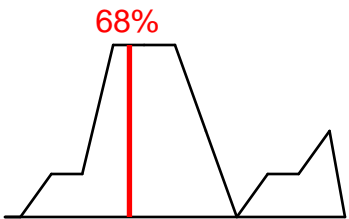

Hydrogen Bond -2.13

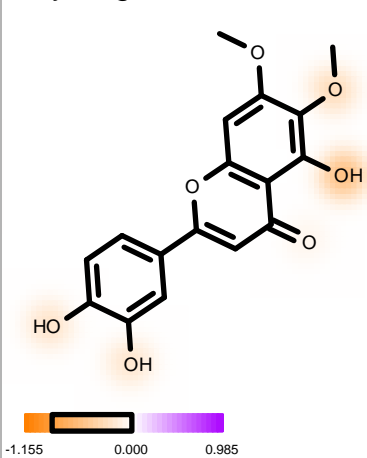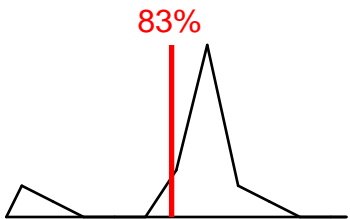

Protein Desolvation 3.86

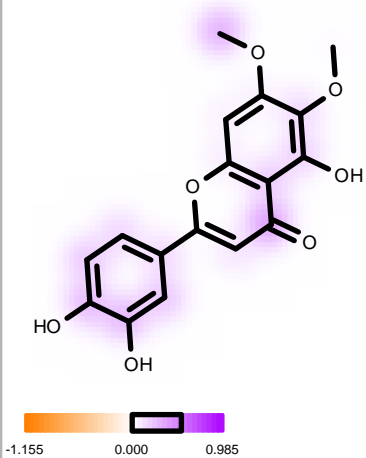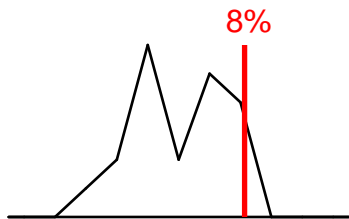

Ligand Desolvation 2.72

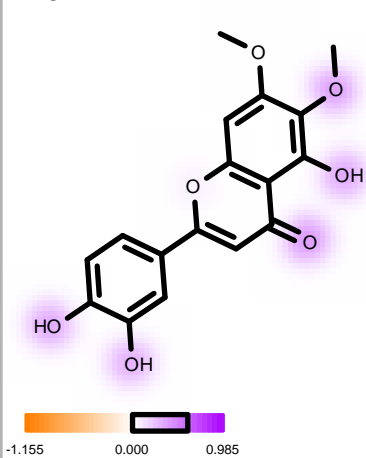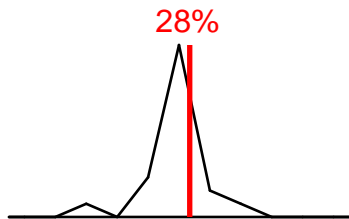

Acceptor  
Metal

Donor  
Contact

Molecule Name omega\_1\_10  
Molecular Weight 330.3  
XLogP 1.2  
PSA 109.4  
Heavy Atoms 24  
Acceptor Count 7  
Donor Count 3  
Chelator Count 3  
Pose Index 16

Total Score -10.24

Score compared to other molecules

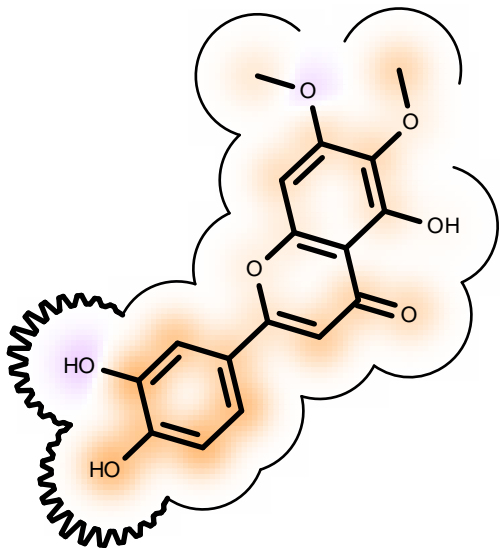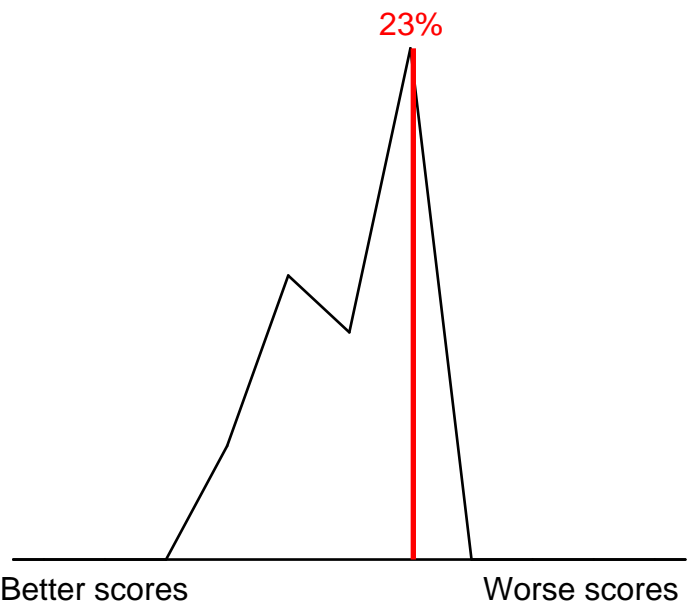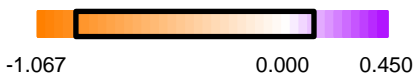

Protein Contact Protein Cavity

Residue Fingerprint

|         |         |
|---------|---------|
| ALA256G | ALA278E |
| ALA278F | ALA293B |
| ALA293C | ALA336B |
| ARG252G | ARG291B |
| ASP316F | ASP333B |
| GLN255G | GLU264G |
| GLU292B | GLU292C |
| GLY290B | ILE263G |
| LYS260G | THR259G |
| VAL279E | VAL279F |

Shape -13.29

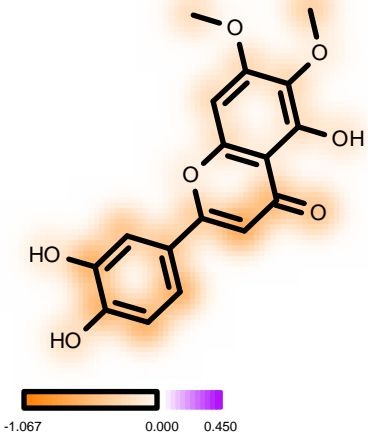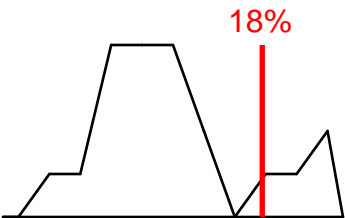

Hydrogen Bond -1.18

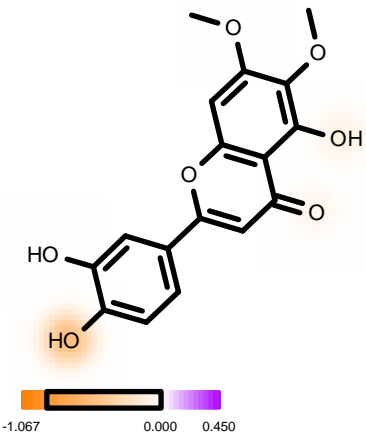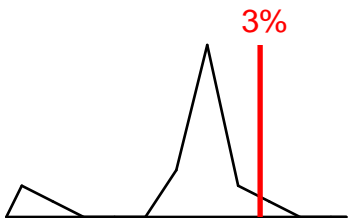

Protein Desolvation 2.47

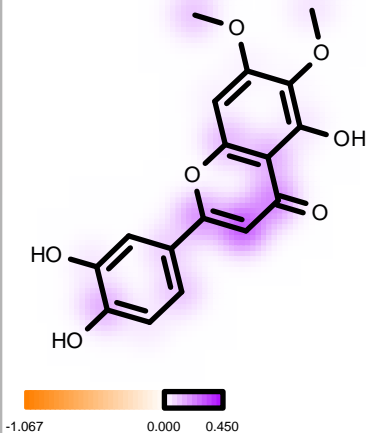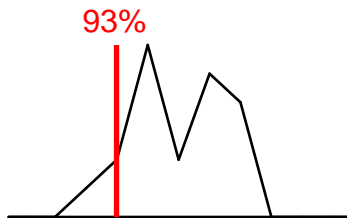

Ligand Desolvation 1.75

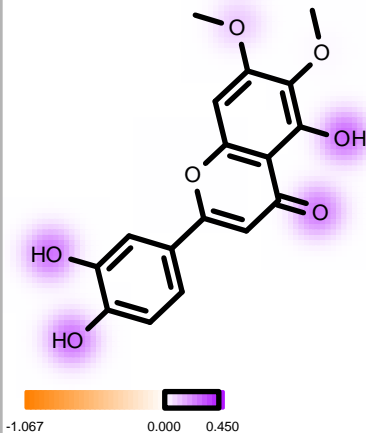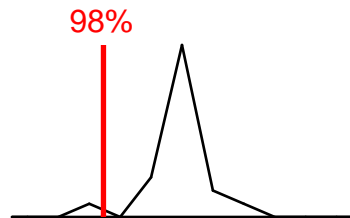

Acceptor Donor  
Metal Contact



Molecule Name      omega\_1\_4  
Molecular Weight    330.3  
XLogP                1.2  
PSA                  109.4  
Heavy Atoms        24  
Acceptor Count     7  
Donor Count        3  
Chelator Count     3  
Pose Index          17

Total Score    -10.23

Score compared to other molecules

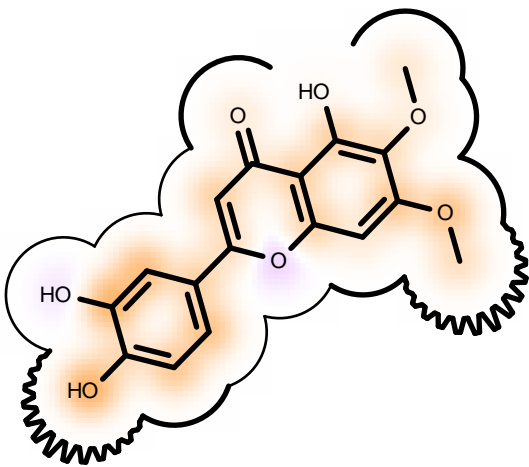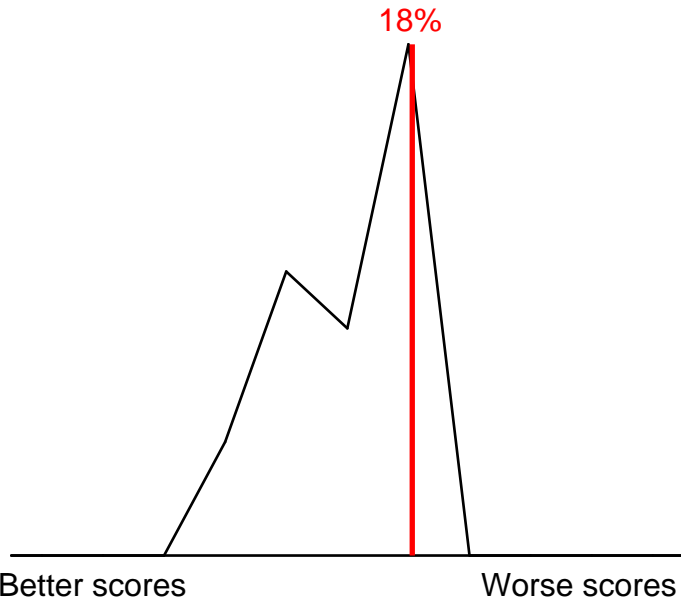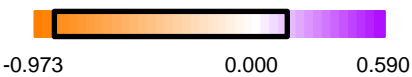

Protein Contact      Protein Cavity

Residue Fingerprint

|         |                |
|---------|----------------|
| ALA256G | ALA278E        |
| ALA278F | ALA293B        |
| ALA293C | ALA336B        |
| ARG252G | ARG291B        |
| ASP316F | ASP333B        |
| GLN255G | GLU264G        |
| GLU292B | GLU292C        |
| GLY290B | ILE263G        |
| LYS260G | <b>THR259G</b> |
| VAL279E | <b>VAL279F</b> |

Shape    -13.95

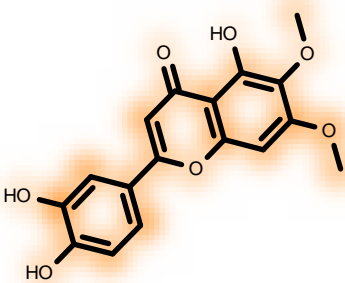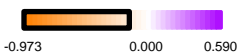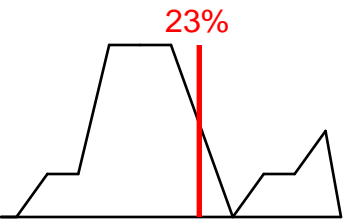

Hydrogen Bond    -1.93

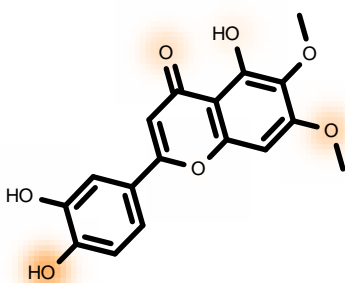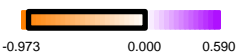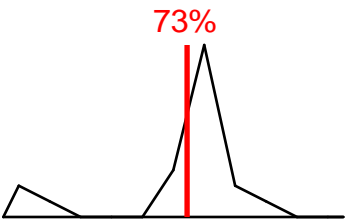

Protein Desolvation    3.04

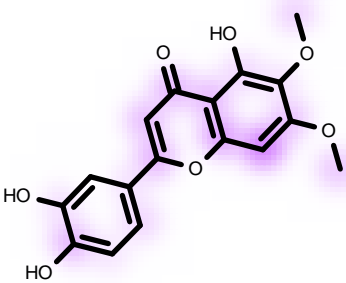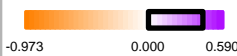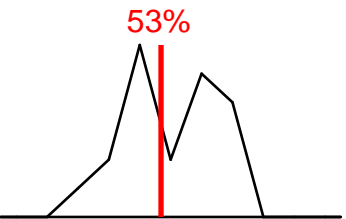

Ligand Desolvation    2.61

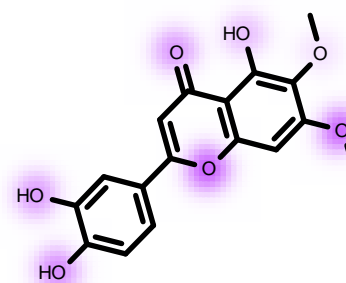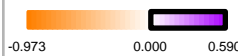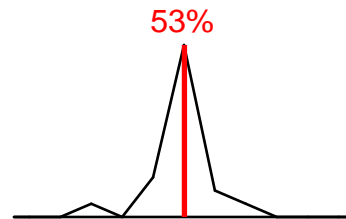

Acceptor      Donor  
Metal        Contact

Molecule Name      omega\_1\_14  
Molecular Weight    330.3  
XLogP                1.2  
PSA                  109.4  
Heavy Atoms        24  
Acceptor Count     7  
Donor Count        3  
Chelator Count     3  
Pose Index          18

Total Score    -10.22

Score compared to other molecules

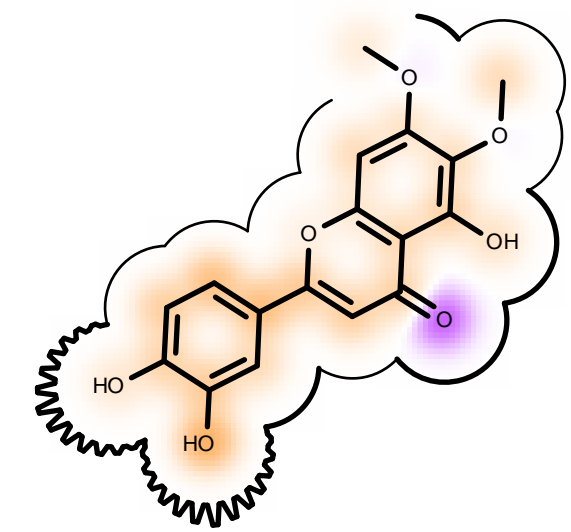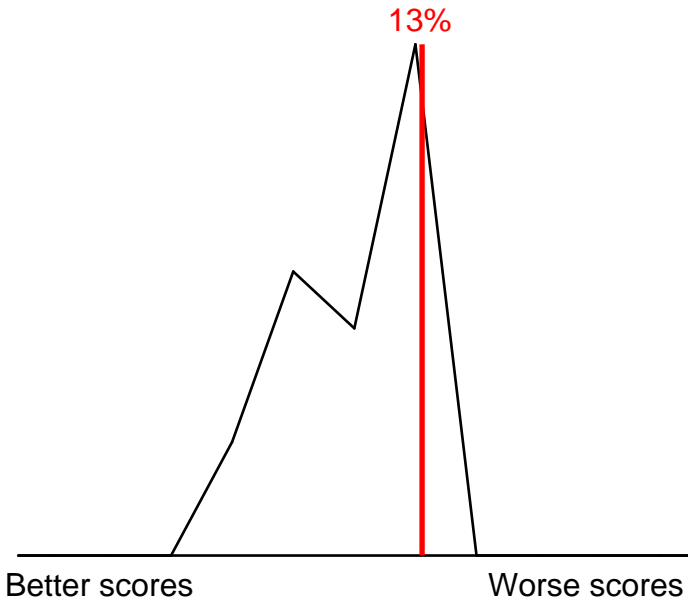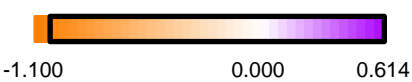

Protein Contact      Protein Cavity

Residue Fingerprint

|                |         |
|----------------|---------|
| ALA256G        | ALA278E |
| ALA278F        | ALA293B |
| ALA293C        | ALA336B |
| ARG252G        | ARG291B |
| ASP316F        | ASP333B |
| GLN255G        | GLU264G |
| <b>GLU292B</b> | GLU292C |
| GLY290B        | ILE263G |
| <b>LYS260G</b> | THR259G |
| VAL279E        | VAL279F |

Shape    -14.66

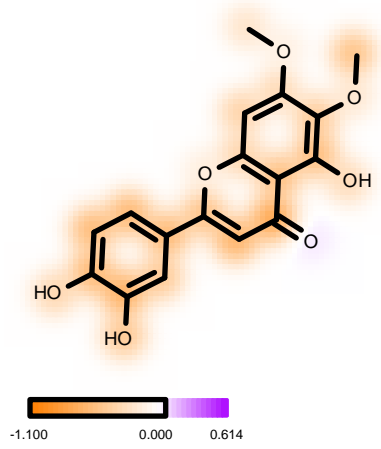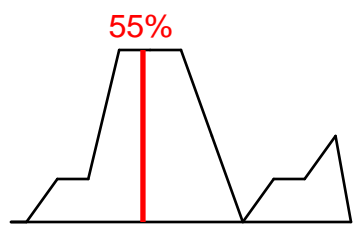

Hydrogen Bond    -1.73

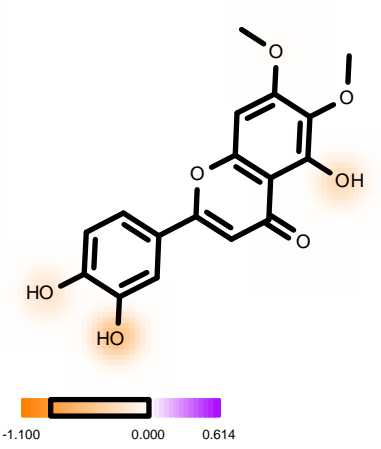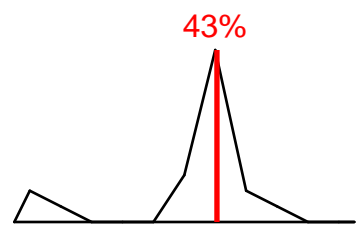

Protein Desolvation    3.43

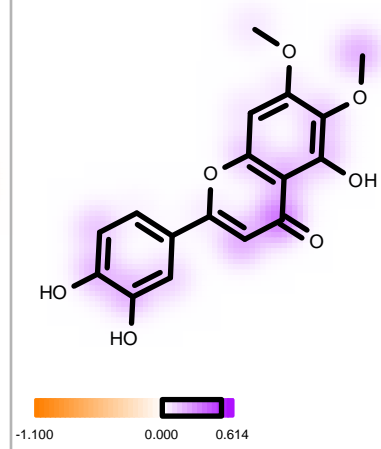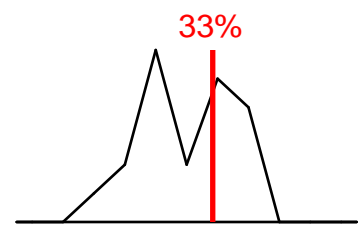

Ligand Desolvation    2.75

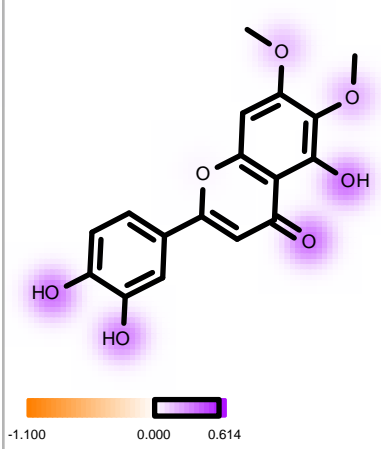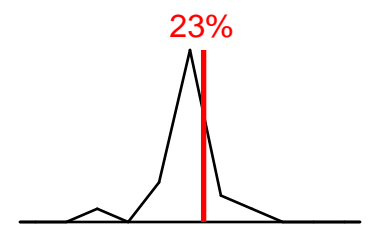

Acceptor      Donor  
Metal      Contact

Molecule Name omega\_1\_12  
Molecular Weight 330.3  
XLogP 1.2  
PSA 109.4  
Heavy Atoms 24  
Acceptor Count 7  
Donor Count 3  
Chelator Count 3  
Pose Index 19

Total Score -10.20

Score compared to other molecules

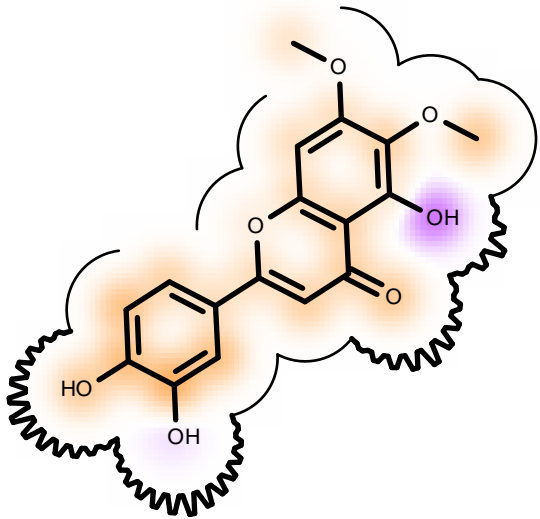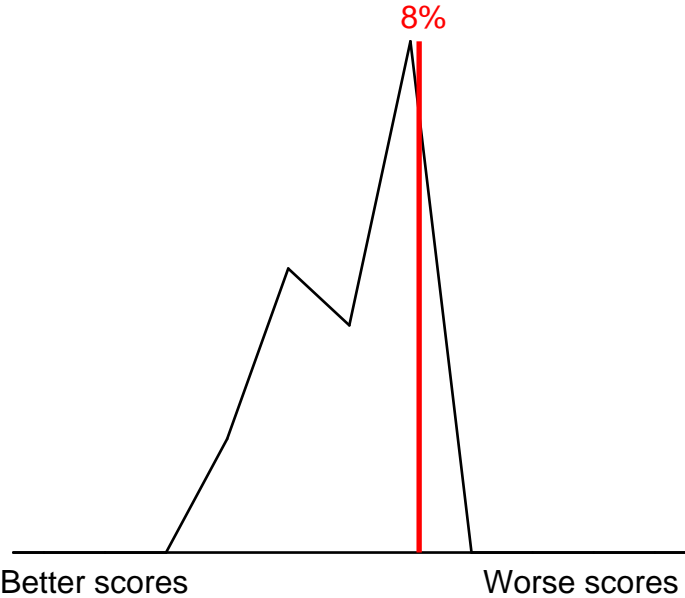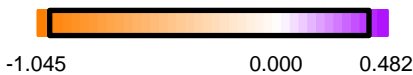

Protein Contact Protein Cavity

Residue Fingerprint

|         |         |
|---------|---------|
| ALA256G | ALA278E |
| ALA278F | ALA293B |
| ALA293C | ALA336B |
| ARG252G | ARG291B |
| ASP316F | ASP333B |
| GLN255G | GLU264G |
| GLU292B | GLU292C |
| GLY290B | ILE263G |
| LYS260G | THR259G |
| VAL279E | VAL279F |

Shape -14.23

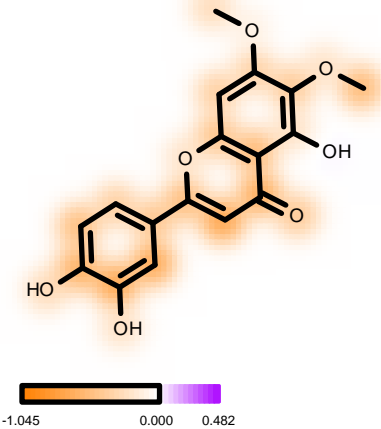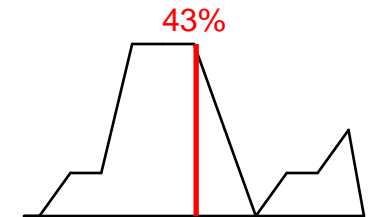

Hydrogen Bond -1.40

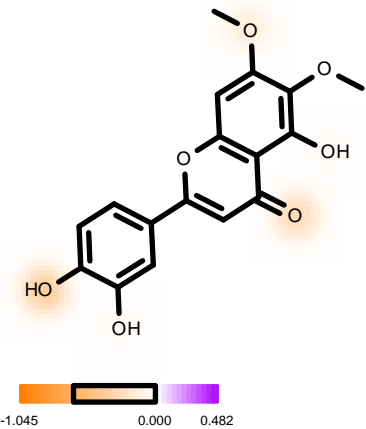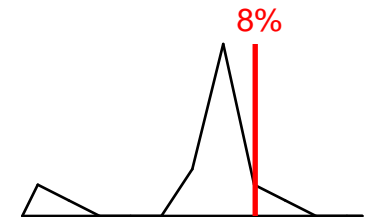

Protein Desolvation 2.92

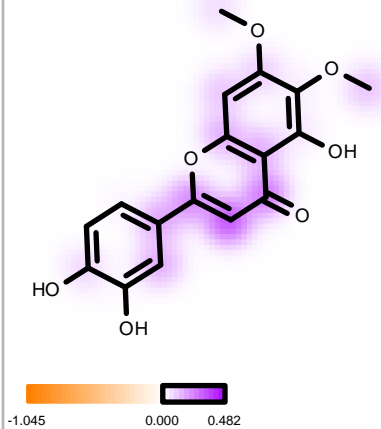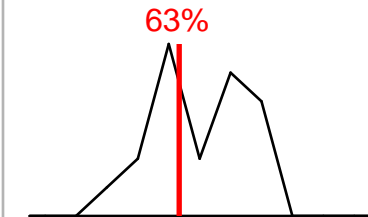

Ligand Desolvation 2.50

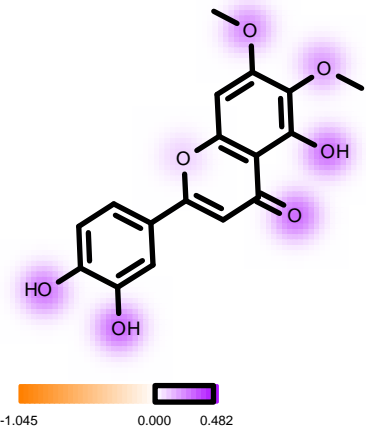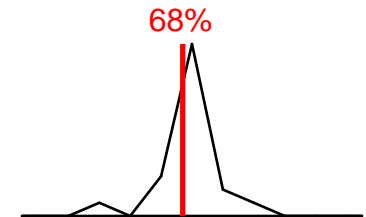

Acceptor Metal Donor Contact

Molecule Name      omega\_1\_12  
Molecular Weight    330.3  
XLogP                1.2  
PSA                  109.4  
Heavy Atoms        24  
Acceptor Count     7  
Donor Count        3  
Chelator Count     3  
Pose Index          20

Total Score    -10.14

Score compared to other molecules

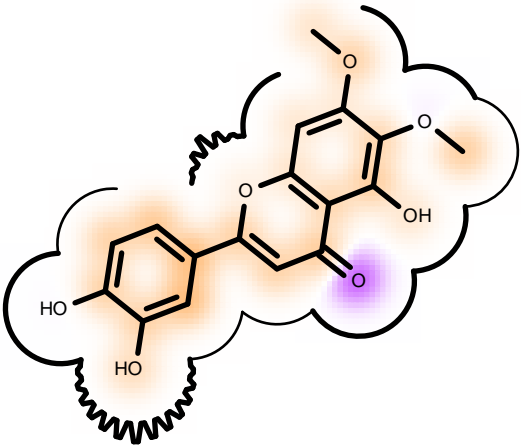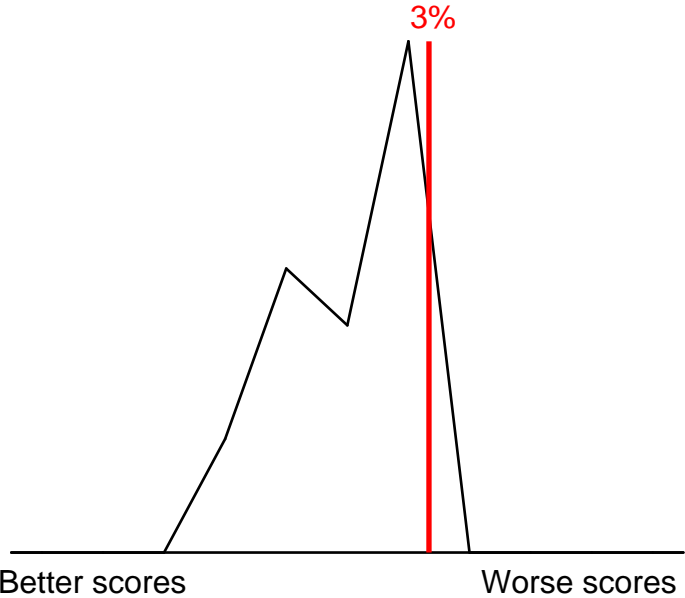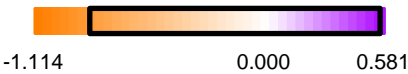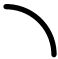

Protein Contact

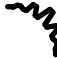

Protein Cavity

Residue Fingerprint

|                |                |
|----------------|----------------|
| ALA256G        | ALA278E        |
| ALA278F        | ALA293B        |
| ALA293C        | ALA336B        |
| ARG252G        | ARG291B        |
| ASP316F        | ASP333B        |
| GLN255G        | GLU264G        |
| <b>GLU292B</b> | GLU292C        |
| GLY290B        | ILE263G        |
| LYS260G        | THR259G        |
| VAL279E        | <b>VAL279F</b> |

Shape    -14.00

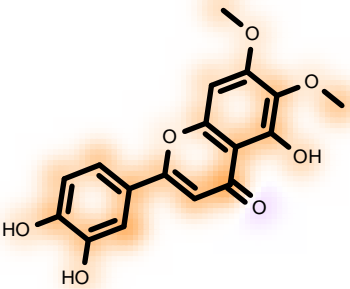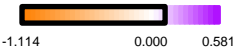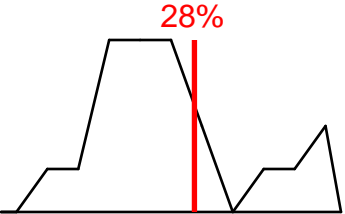

Hydrogen Bond    -1.81

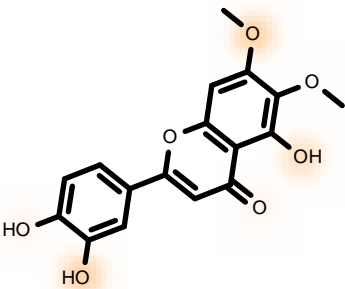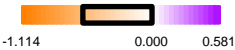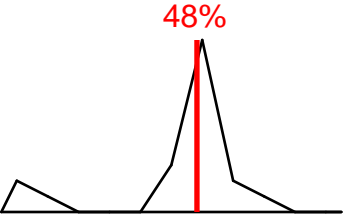

Protein Desolvation    2.91

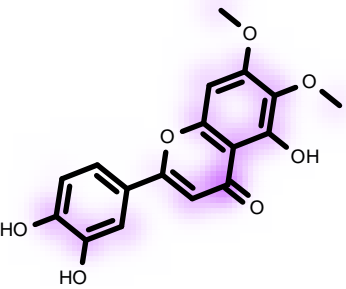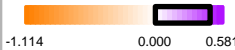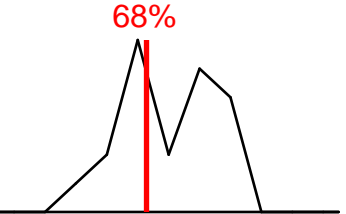

Ligand Desolvation    2.76

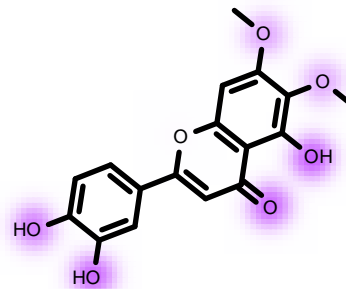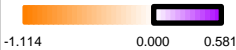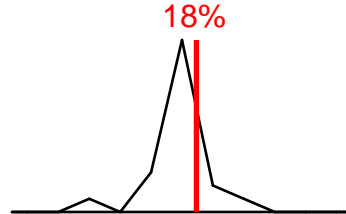

Acceptor  
Metal

Donor  
Contact
