# Supplementary material for: The Flavone Cirsiliol from Salvia x jamensis Binds the F1 Moiety of ATP Synthase, Modulating Free Radical Production
Source: MDPI journal article supplement (doi:10.3390/cells11193169), 2022-10-09
Supplement: s1 [file s1]

Molecule Name omega\_1\_4  
Molecular Weight 330.3  
XLogP 1.2  
PSA 109.4  
Heavy Atoms 24  
Acceptor Count 7  
Donor Count 3  
Chelator Count 3  
Pose Index 1

Total Score -10.70

Score compared to other molecules

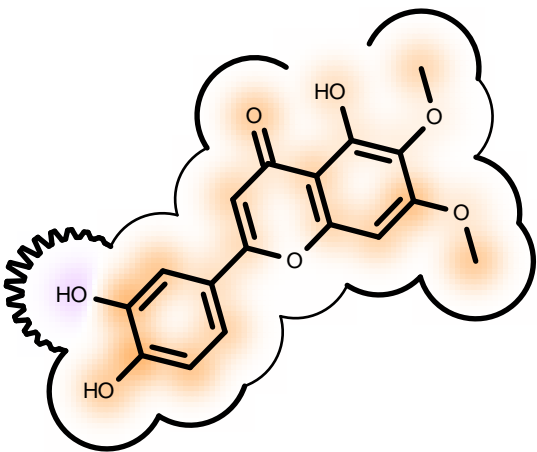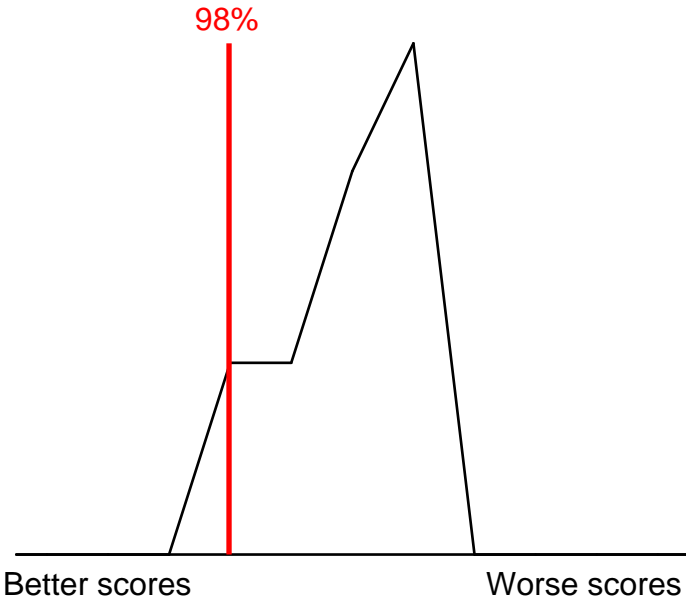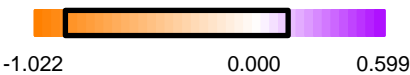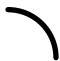

Protein Contact

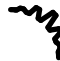

Protein Cavity

Residue Fingerprint

|                |                |
|----------------|----------------|
| ALA256G        | ALA278E        |
| ALA278F        | ALA293B        |
| ALA293C        | ALA336B        |
| ARG252G        | ARG279C        |
| <b>ARG291B</b> | ASP316F        |
| ASP333B        | GLN255G        |
| GLU264G        | GLU292B        |
| GLU292C        | GLY290B        |
| GLY290C        | ILE263G        |
| ILE338C        | LYS260G        |
| PRO276F        | PRO289C        |
| SER267G        | SER277F        |
| <b>THR259G</b> | TYR294C        |
| VAL279E        | <b>VAL279F</b> |

Shape -14.75

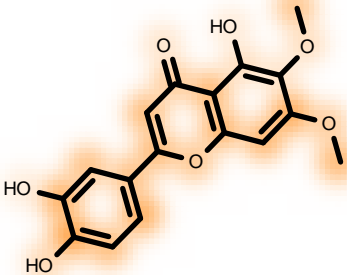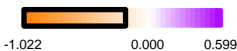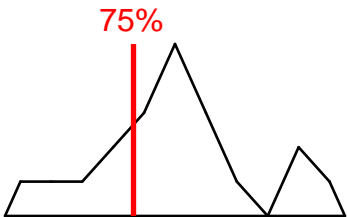

Hydrogen Bond -1.97

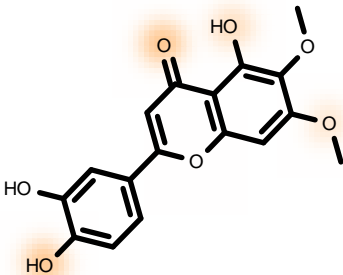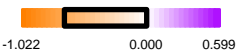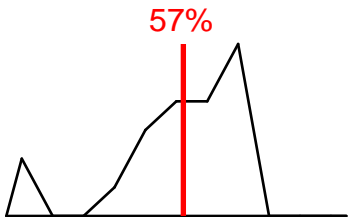

Protein Desolvation 3.33

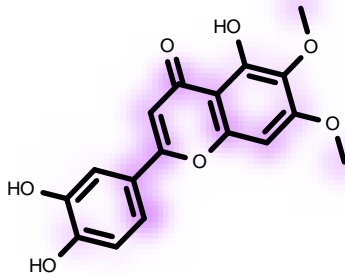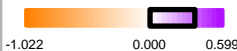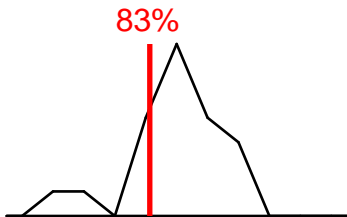

Ligand Desolvation 2.69

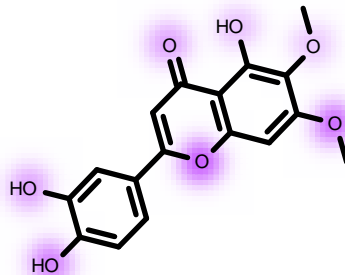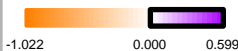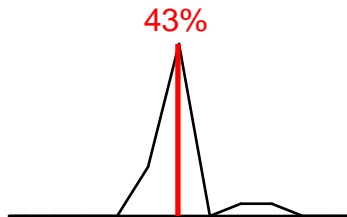

Acceptor

Metal

Donor

Contact

Molecule Name      omega\_1\_10  
Molecular Weight    330.3  
XLogP                1.2  
PSA                  109.4  
Heavy Atoms        24  
Acceptor Count     7  
Donor Count        3  
Chelator Count     3  
Pose Index          2

Total Score    -10.65

Score compared to other molecules

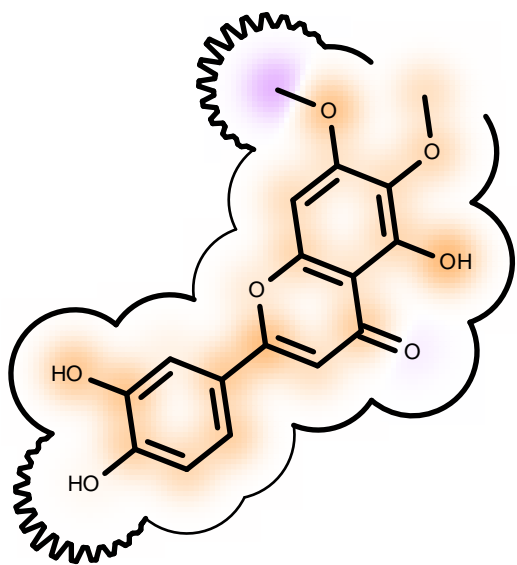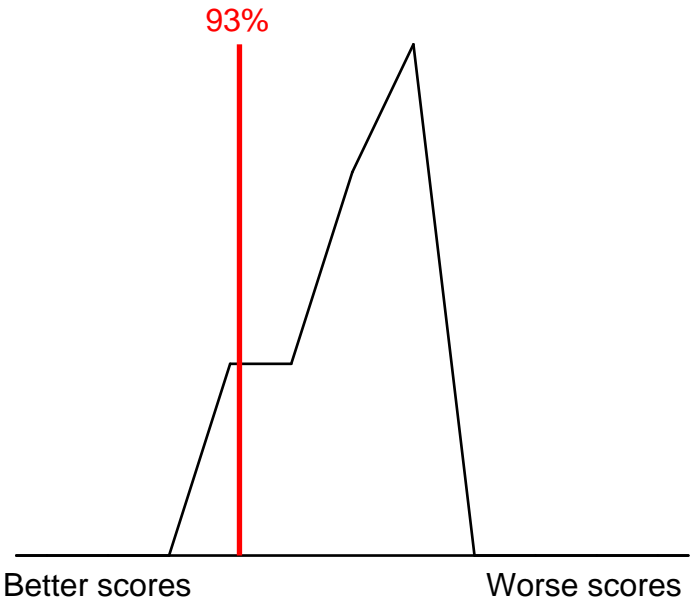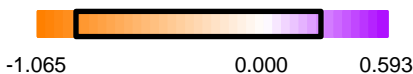

Protein Contact                      Protein Cavity

Residue Fingerprint

|                |                |
|----------------|----------------|
| ALA256G        | ALA278E        |
| ALA278F        | ALA293B        |
| ALA293C        | ALA336B        |
| ARG252G        | ARG279C        |
| <b>ARG291B</b> | ASP316F        |
| ASP333B        | GLN255G        |
| <b>GLU264G</b> | <b>GLU292B</b> |
| GLU292C        | GLY290B        |
| GLY290C        | ILE263G        |
| ILE338C        | LYS260G        |
| PRO276F        | PRO289C        |
| SER267G        | SER277F        |
| THR259G        | TYR294C        |
| VAL279E        | VAL279F        |

Shape    -14.44

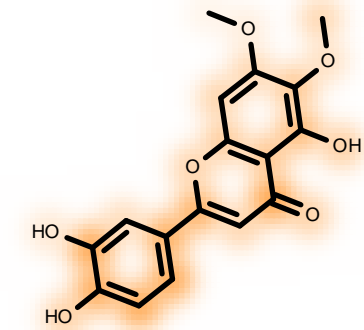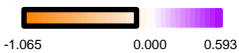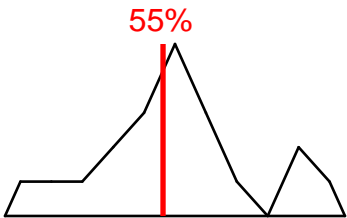

Hydrogen Bond    -3.58

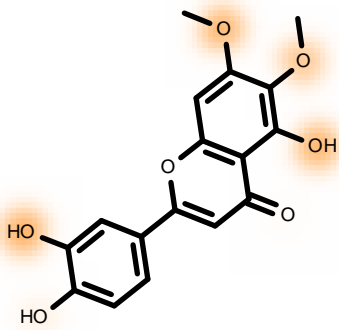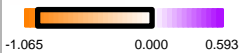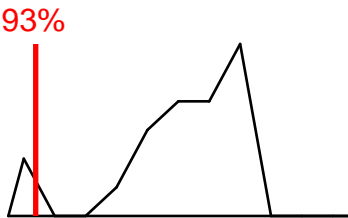

Protein Desolvation    4.10

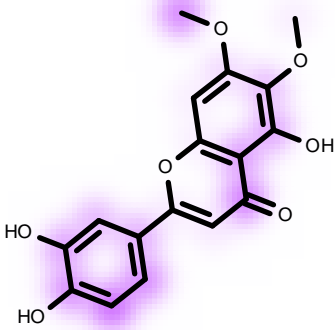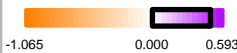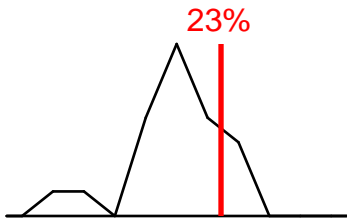

Ligand Desolvation    3.27

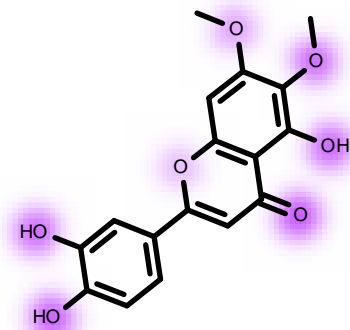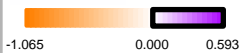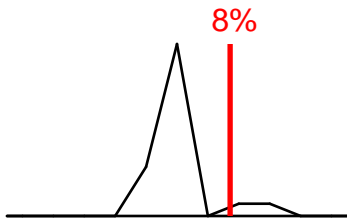

**Acceptor**                      **Donor**  
**Metal**                          Contact

Molecule Name      omega\_1\_4  
Molecular Weight    330.3  
XLogP                1.2  
PSA                  109.4  
Heavy Atoms        24  
Acceptor Count      7  
Donor Count        3  
Chelator Count      3  
Pose Index          3

Total Score    -10.61

Score compared to other molecules

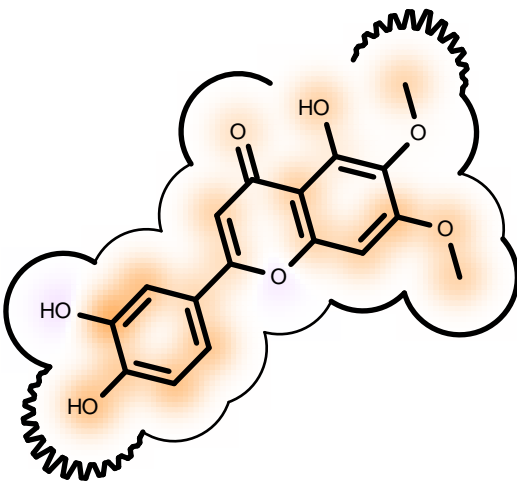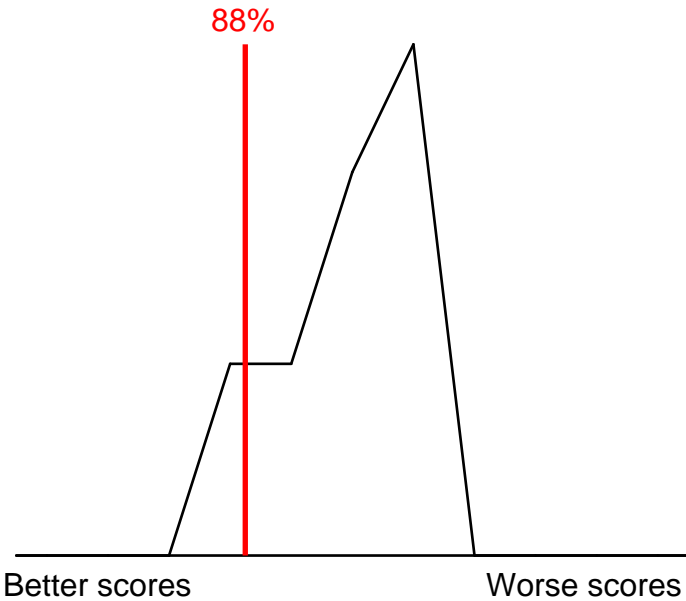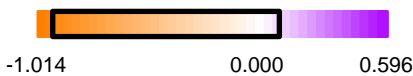

Protein Contact      Protein Cavity

Residue Fingerprint

|                |                |
|----------------|----------------|
| ALA256G        | ALA278E        |
| ALA278F        | ALA293B        |
| ALA293C        | ALA336B        |
| ARG252G        | ARG279C        |
| <b>ARG291B</b> | ASP316F        |
| ASP333B        | GLN255G        |
| GLU264G        | <b>GLU292B</b> |
| GLU292C        | GLY290B        |
| GLY290C        | ILE263G        |
| ILE338C        | LYS260G        |
| PRO276F        | PRO289C        |
| SER267G        | SER277F        |
| <b>THR259G</b> | TYR294C        |
| VAL279E        | <b>VAL279F</b> |

Shape    -14.34

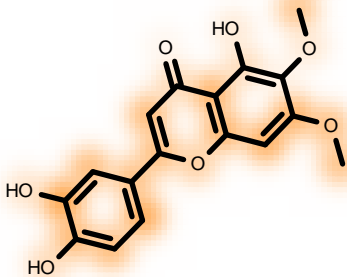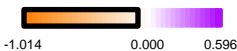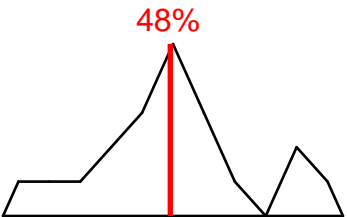

Hydrogen Bond    -2.40

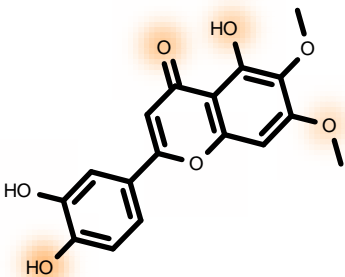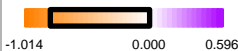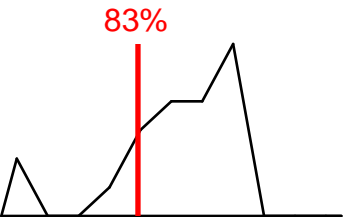

Protein Desolvation    3.36

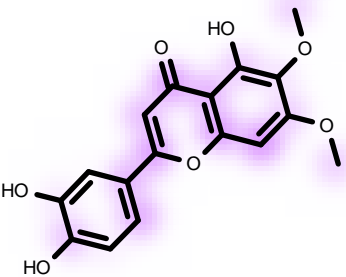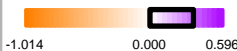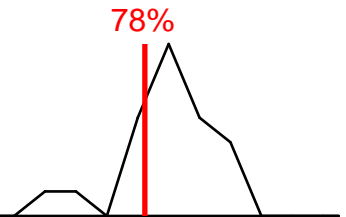

Ligand Desolvation    2.76

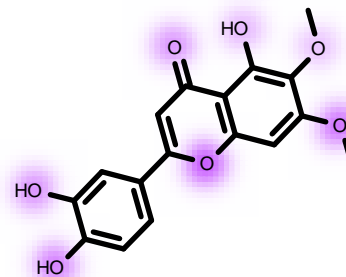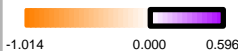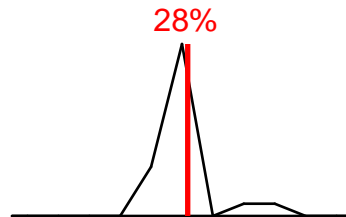

Acceptor      Donor  
Metal      Contact

Molecule Name      omega\_1\_13  
Molecular Weight    330.3  
XLogP                1.2  
PSA                  109.4  
Heavy Atoms        24  
Acceptor Count     7  
Donor Count        3  
Chelator Count     3  
Pose Index          4

Total Score    -10.41

Score compared to other molecules

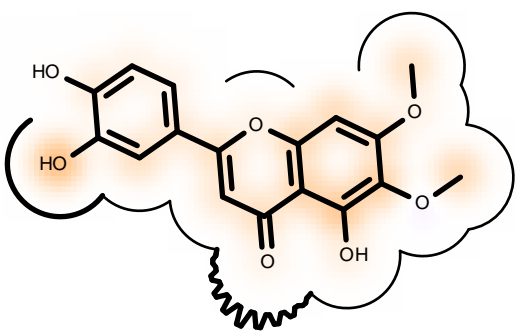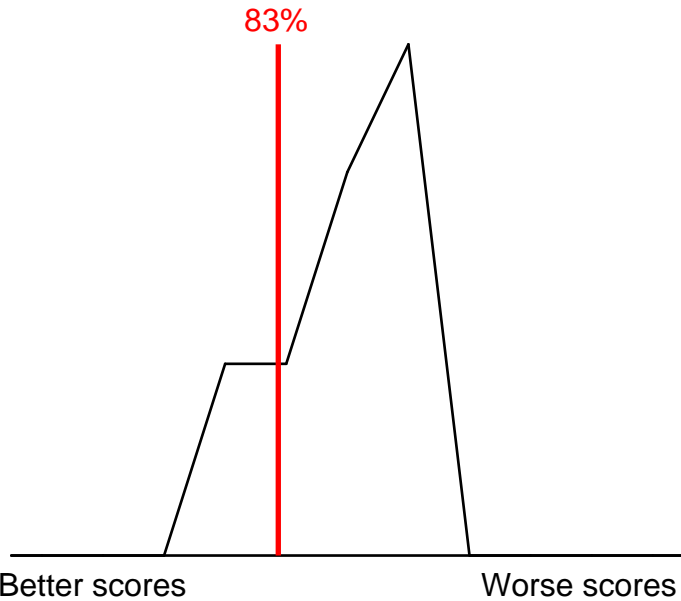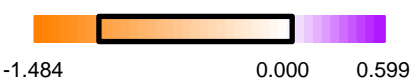

Protein Contact      Protein Cavity

Residue Fingerprint

|                |         |
|----------------|---------|
| ALA256G        | ALA278E |
| ALA278F        | ALA293B |
| ALA293C        | ALA336B |
| ARG252G        | ARG279C |
| ARG291B        | ASP316F |
| ASP333B        | GLN255G |
| GLU264G        | GLU292B |
| <b>GLU292C</b> | GLY290B |
| GLY290C        | ILE263G |
| ILE338C        | LYS260G |
| PRO276F        | PRO289C |
| SER267G        | SER277F |
| THR259G        | TYR294C |
| VAL279E        | VAL279F |

Shape    -12.97

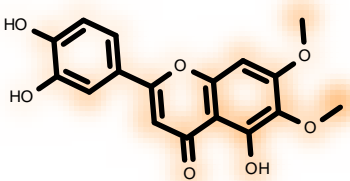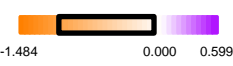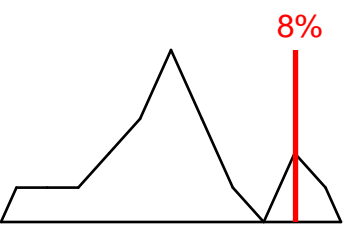

Hydrogen Bond    -1.90

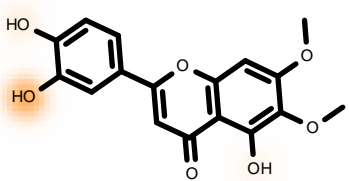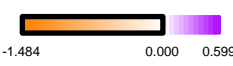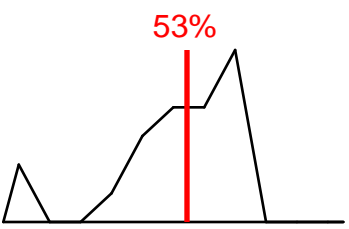

Protein Desolvation    2.14

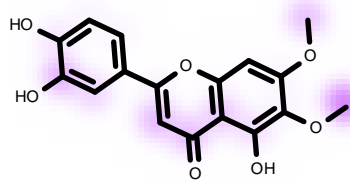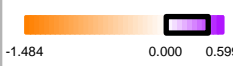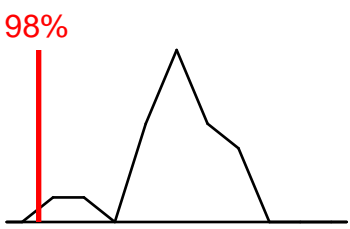

Ligand Desolvation    2.32

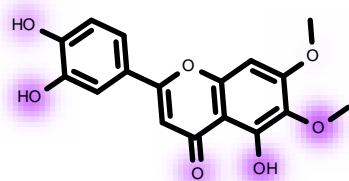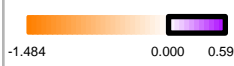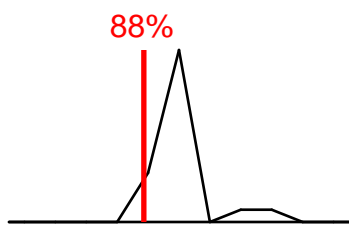

Acceptor      Donor  
Metal        Contact

Molecule Name      omega\_1\_1  
Molecular Weight    330.3  
XLogP                1.2  
PSA                  109.4  
Heavy Atoms         24  
Acceptor Count      7  
Donor Count         3  
Chelator Count      3  
Pose Index           5

Total Score    -10.38

Score compared to other molecules

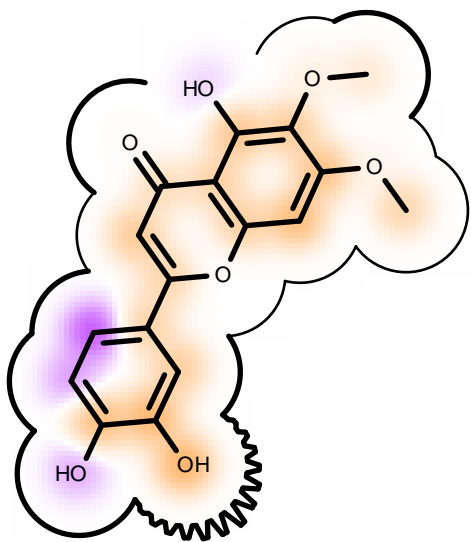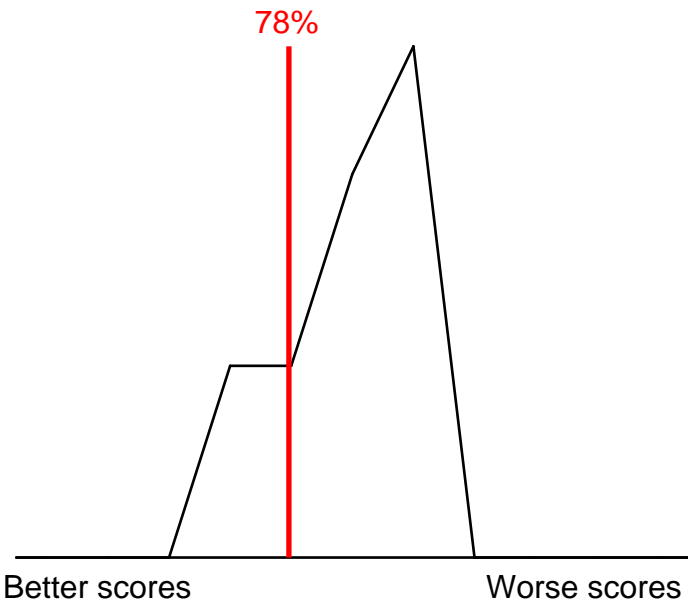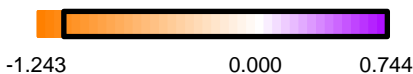

Protein Contact                      Protein Cavity

Residue Fingerprint

|                |         |
|----------------|---------|
| ALA256G        | ALA278E |
| ALA278F        | ALA293B |
| ALA293C        | ALA336B |
| ARG252G        | ARG279C |
| ARG291B        | ASP316F |
| ASP333B        | GLN255G |
| <b>GLU264G</b> | GLU292B |
| GLU292C        | GLY290B |
| GLY290C        | ILE263G |
| ILE338C        | LYS260G |
| PRO276F        | PRO289C |
| <b>SER267G</b> | SER277F |
| THR259G        | TYR294C |
| VAL279E        | VAL279F |

Shape    -15.83

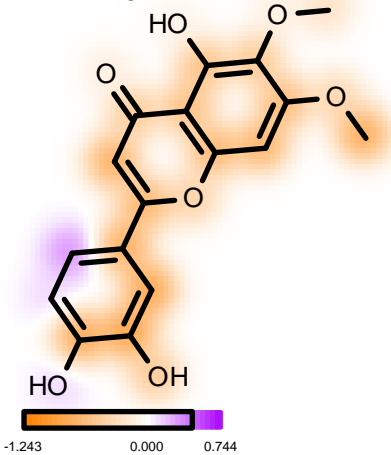

98%

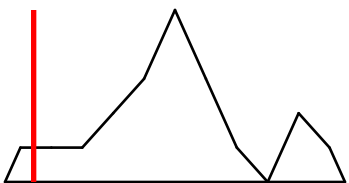

Hydrogen Bond    -1.32

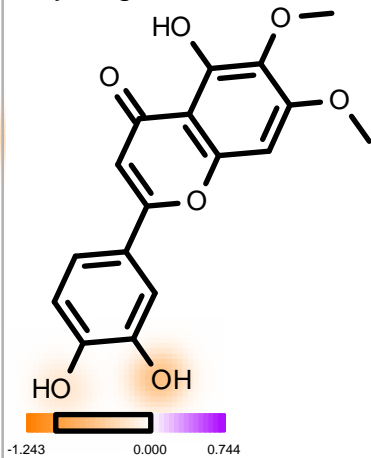

13%

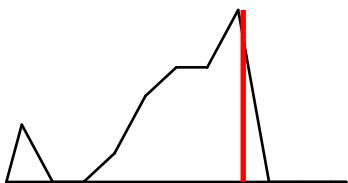

Protein Desolvation    4.11

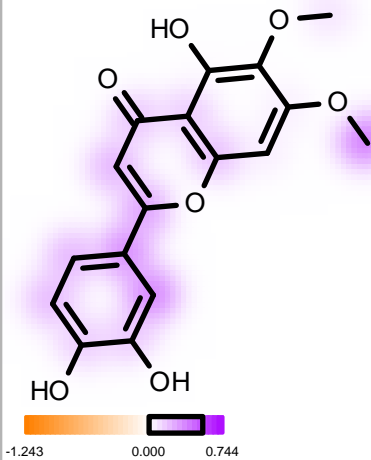

18%

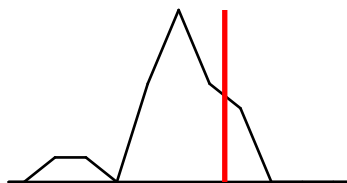

Ligand Desolvation    2.66

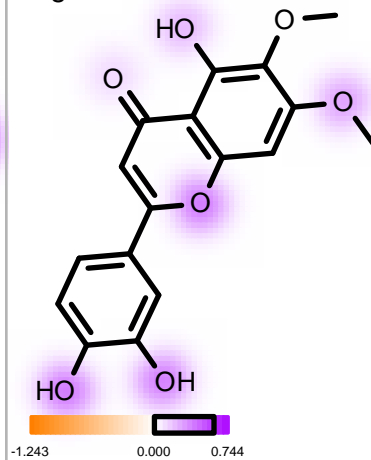

63%

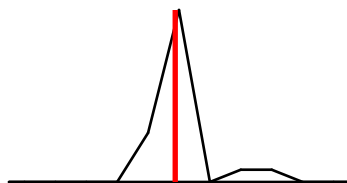

Acceptor                      Donor  
Metal                      Contact

Molecule Name omega\_1\_1  
Molecular Weight 330.3  
XLogP 1.2  
PSA 109.4  
Heavy Atoms 24  
Acceptor Count 7  
Donor Count 3  
Chelator Count 3  
Pose Index 6

Total Score -10.23

Score compared to other molecules

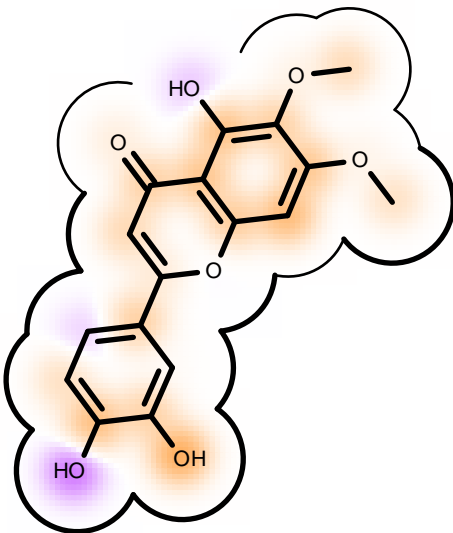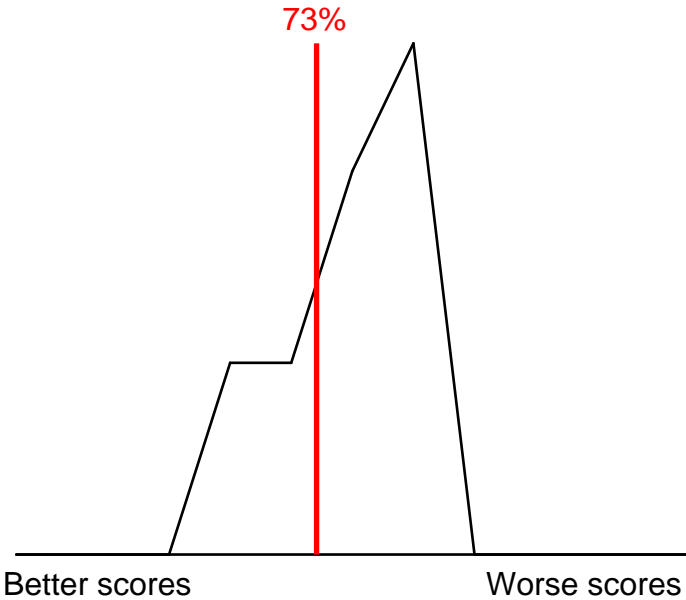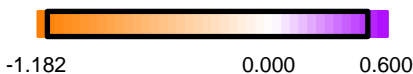

Protein Contact

Protein Cavity

Residue Fingerprint

|                |         |
|----------------|---------|
| ALA256G        | ALA278E |
| ALA278F        | ALA293B |
| ALA293C        | ALA336B |
| ARG252G        | ARG279C |
| ARG291B        | ASP316F |
| ASP333B        | GLN255G |
| GLU264G        | GLU292B |
| GLU292C        | GLY290B |
| GLY290C        | ILE263G |
| ILE338C        | LYS260G |
| PRO276F        | PRO289C |
| <b>SER267G</b> | SER277F |
| THR259G        | TYR294C |
| VAL279E        | VAL279F |

Shape -15.78

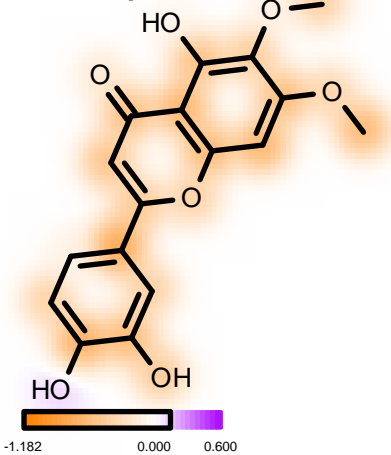

93%

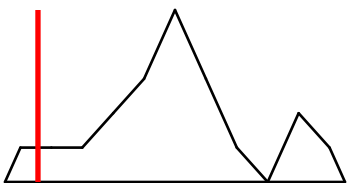

Hydrogen Bond -1.26

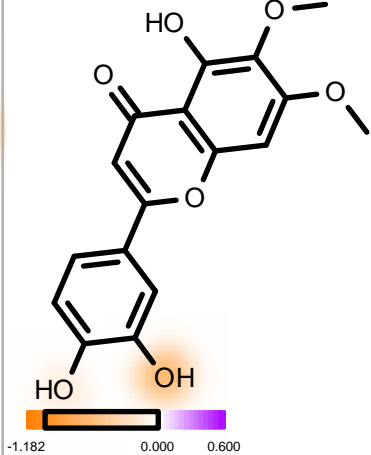

3%

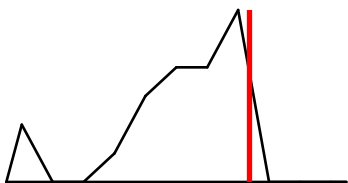

Protein Desolvation 4.27

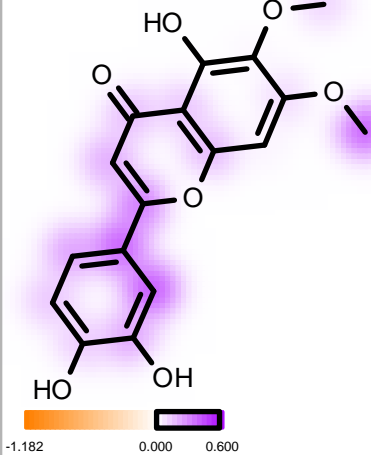

3%

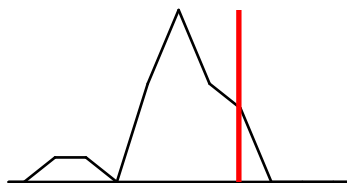

Ligand Desolvation 2.55

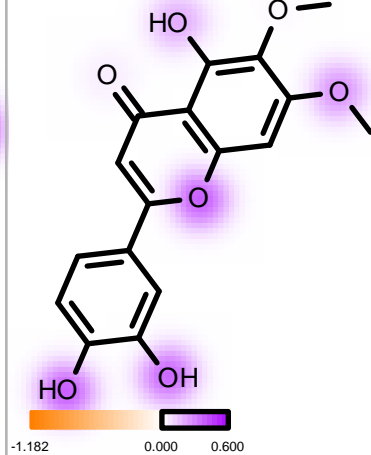

78%

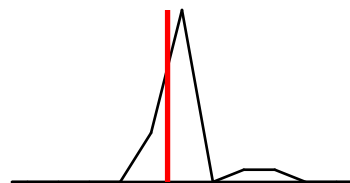

Acceptor  
Metal

Donor  
Contact

Molecule Name omega\_1\_16  
Molecular Weight 330.3  
XLogP 1.2  
PSA 109.4  
Heavy Atoms 24  
Acceptor Count 7  
Donor Count 3  
Chelator Count 3  
Pose Index 7

Total Score -10.11

Score compared to other molecules

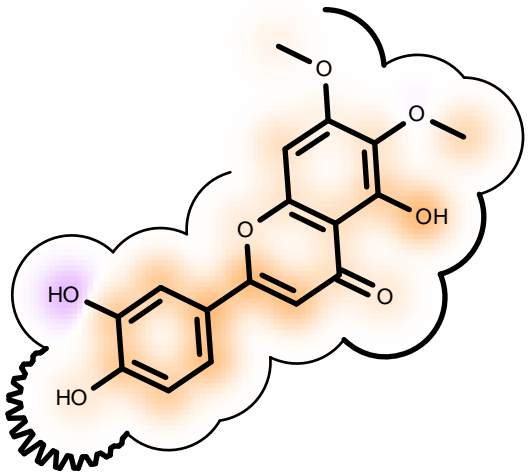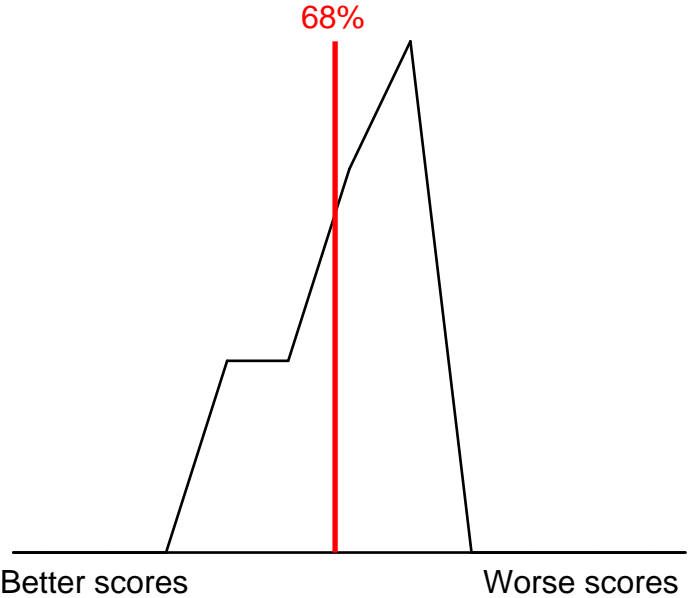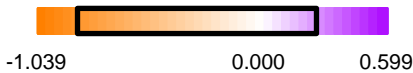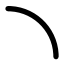

Protein Contact

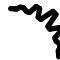

Protein Cavity

Residue Fingerprint

|         |                |
|---------|----------------|
| ALA256G | ALA278E        |
| ALA278F | ALA293B        |
| ALA293C | ALA336B        |
| ARG252G | ARG279C        |
| ARG291B | ASP316F        |
| ASP333B | GLN255G        |
| GLU264G | <b>GLU292B</b> |
| GLU292C | GLY290B        |
| GLY290C | ILE263G        |
| ILE338C | LYS260G        |
| PRO276F | PRO289C        |
| SER267G | SER277F        |
| THR259G | TYR294C        |
| VAL279E | VAL279F        |

Shape -14.92

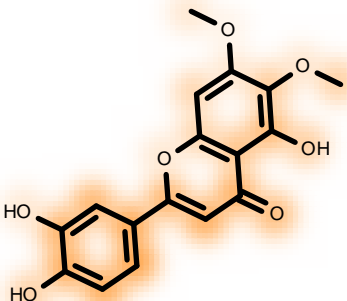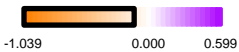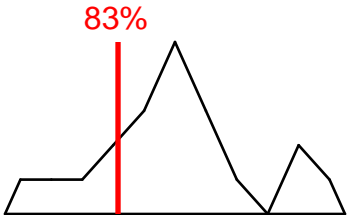

Hydrogen Bond -1.26

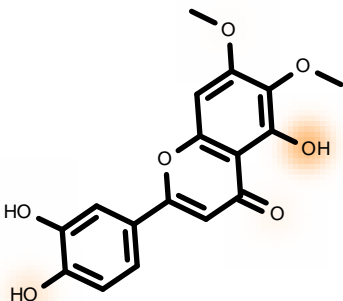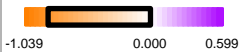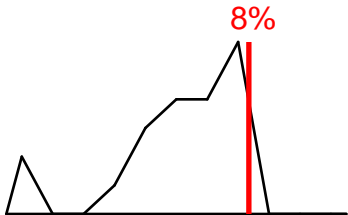

Protein Desolvation 3.41

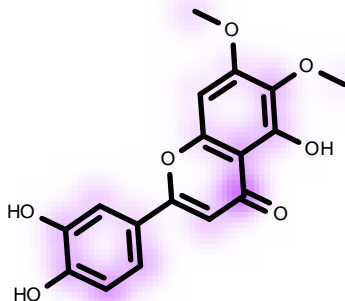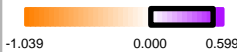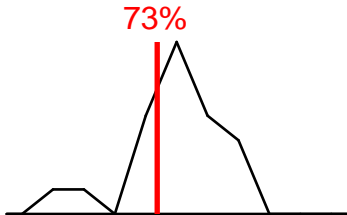

Ligand Desolvation 2.67

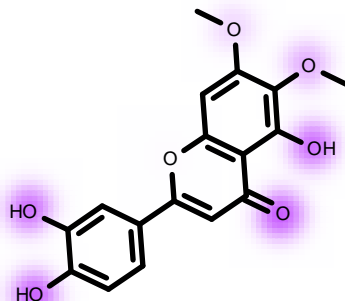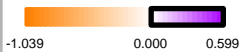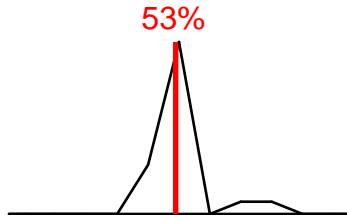

Acceptor  
Metal

Donor  
Contact

Molecule Name omega\_1\_14  
Molecular Weight 330.3  
XLogP 1.2  
PSA 109.4  
Heavy Atoms 24  
Acceptor Count 7  
Donor Count 3  
Chelator Count 3  
Pose Index 8

Total Score -10.05

Score compared to other molecules

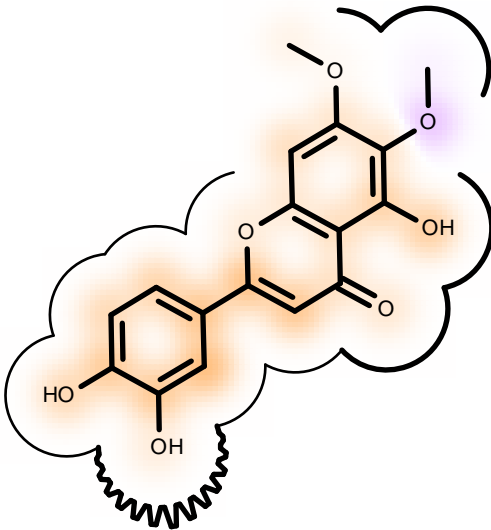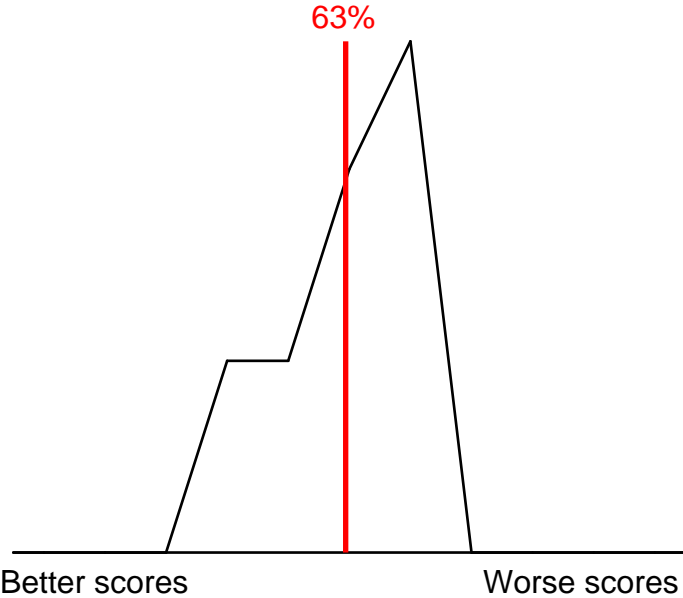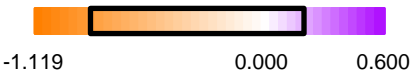

Protein Contact

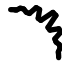

Protein Cavity

Residue Fingerprint

|         |         |
|---------|---------|
| ALA256G | ALA278E |
| ALA278F | ALA293B |
| ALA293C | ALA336B |
| ARG252G | ARG279C |
| ARG291B | ASP316F |
| ASP333B | GLN255G |
| GLU264G | GLU292B |
| GLU292C | GLY290B |
| GLY290C | ILE263G |
| ILE338C | LYS260G |
| PRO276F | PRO289C |
| SER267G | SER277F |
| THR259G | TYR294C |
| VAL279E | VAL279F |

Shape -14.55

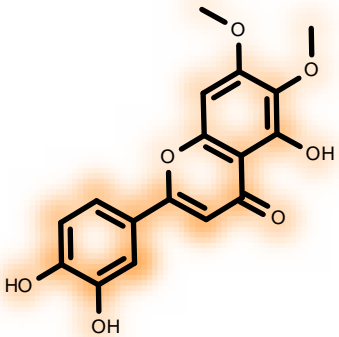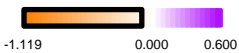

68%

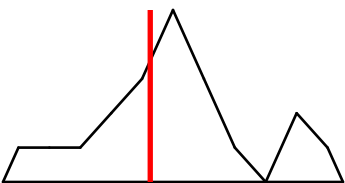

Hydrogen Bond -1.87

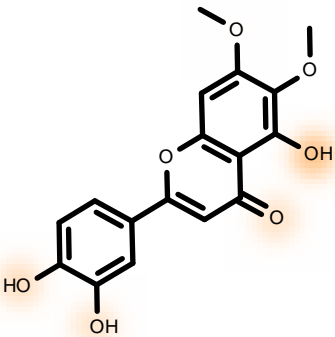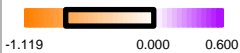

48%

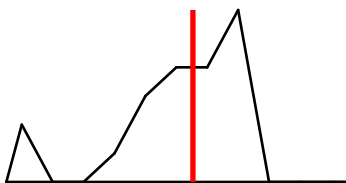

Protein Desolvation 3.69

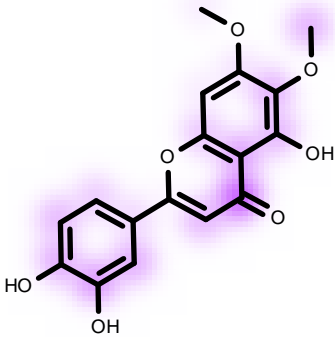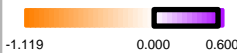

43%

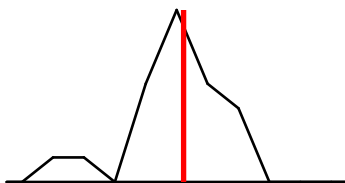

Ligand Desolvation 2.67

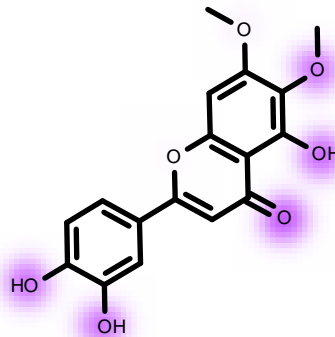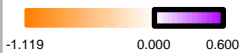

48%

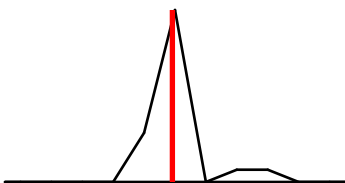

Acceptor  
Metal

Donor  
Contact



Molecule Name omega\_1\_3  
Molecular Weight 330.3  
XLogP 1.2  
PSA 109.4  
Heavy Atoms 24  
Acceptor Count 7  
Donor Count 3  
Chelator Count 3  
Pose Index 9

Total Score -10.01

Score compared to other molecules

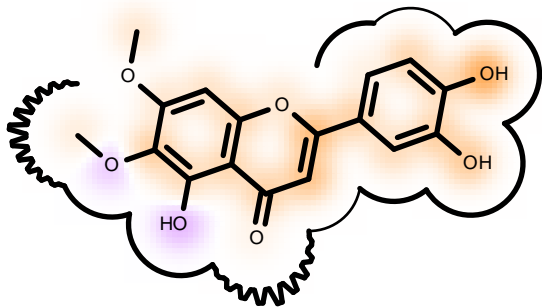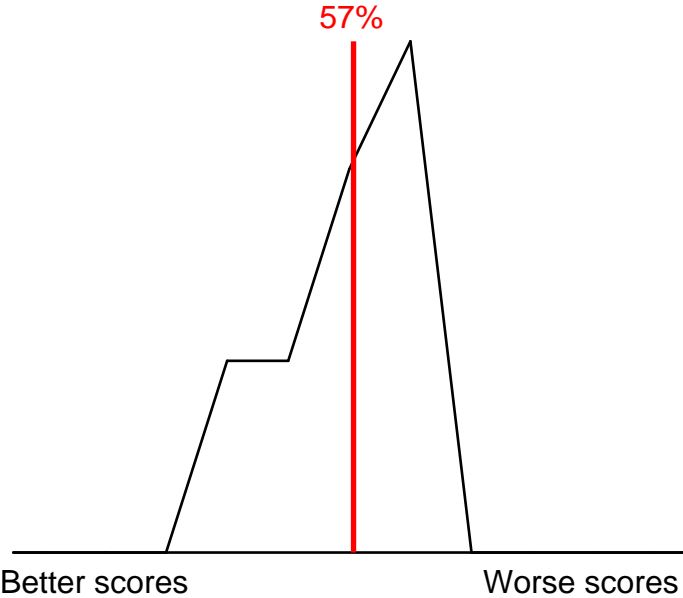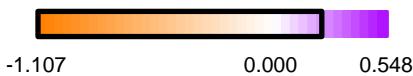

Protein Contact Protein Cavity

Residue Fingerprint

|         |         |
|---------|---------|
| ALA256G | ALA278E |
| ALA278F | ALA293B |
| ALA293C | ALA336B |
| ARG252G | ARG279C |
| ARG291B | ASP316F |
| ASP333B | GLN255G |
| GLU264G | GLU292B |
| GLU292C | GLY290B |
| GLY290C | ILE263G |
| ILE338C | LYS260G |
| PRO276F | PRO289C |
| SER267G | SER277F |
| THR259G | TYR294C |
| VAL279E | VAL279F |

Shape -12.50

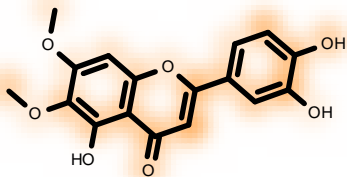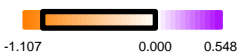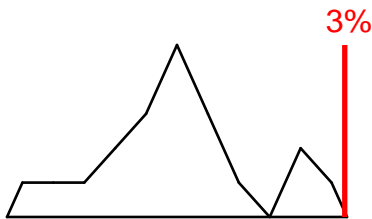

Hydrogen Bond -2.22

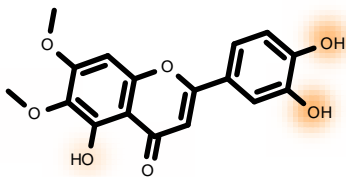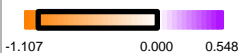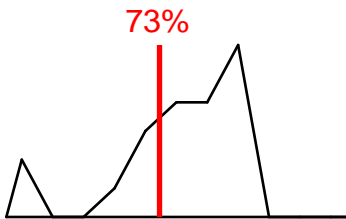

Protein Desolvation 2.50

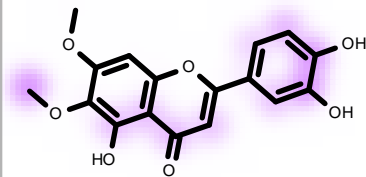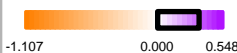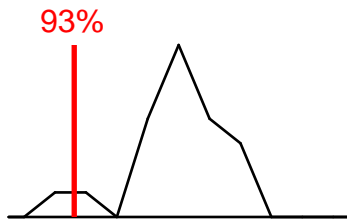

Ligand Desolvation 2.22

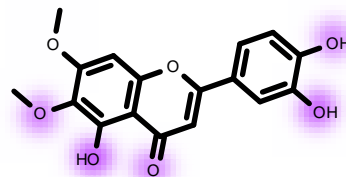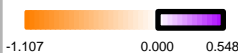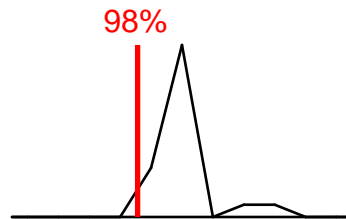

Acceptor Metal Donor Contact

Molecule Name      omega\_1\_13  
Molecular Weight    330.3  
XLogP                1.2  
PSA                  109.4  
Heavy Atoms        24  
Acceptor Count     7  
Donor Count        3  
Chelator Count     3  
Pose Index          10

Total Score      -9.99

Score compared to other molecules

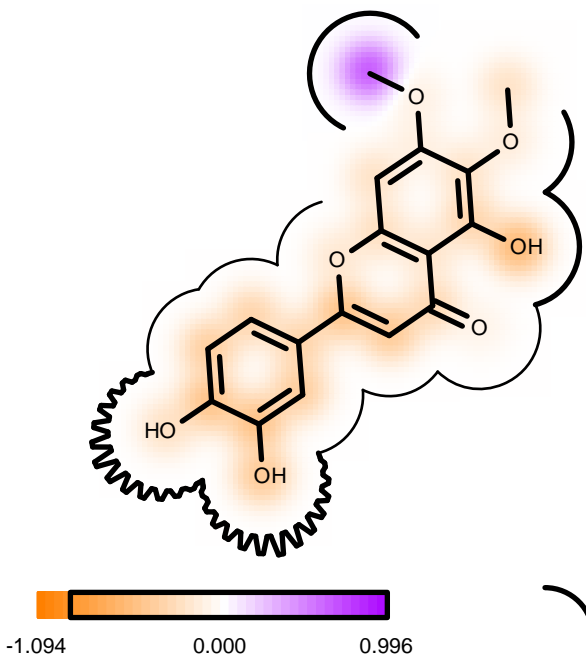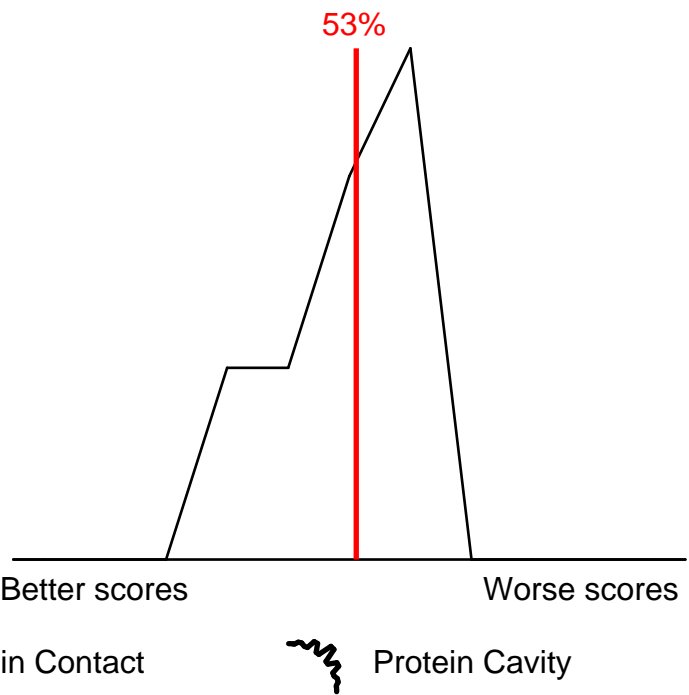

Residue Fingerprint

|                |                |
|----------------|----------------|
| ALA256G        | ALA278E        |
| ALA278F        | ALA293B        |
| ALA293C        | ALA336B        |
| ARG252G        | ARG279C        |
| ARG291B        | ASP316F        |
| ASP333B        | GLN255G        |
| <b>GLU264G</b> | <b>GLU292B</b> |
| GLU292C        | GLY290B        |
| GLY290C        | ILE263G        |
| ILE338C        | <b>LYS260G</b> |
| PRO276F        | PRO289C        |
| SER267G        | SER277F        |
| THR259G        | TYR294C        |
| VAL279E        | VAL279F        |

Shape      -13.89

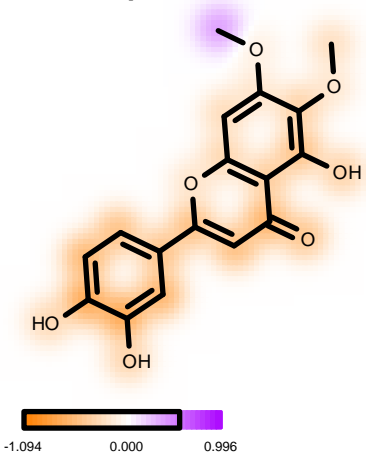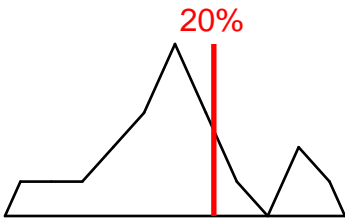

Hydrogen Bond      -2.58

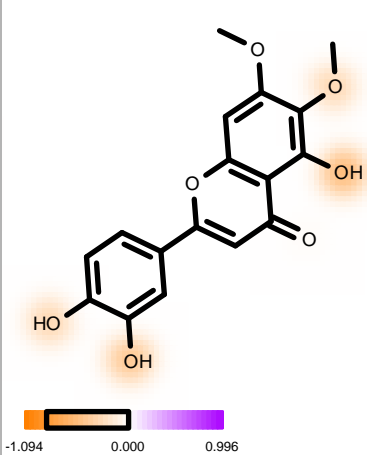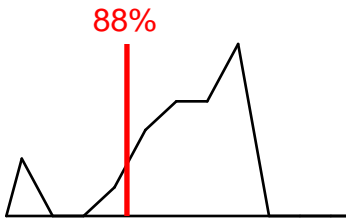

Protein Desolvation      3.67

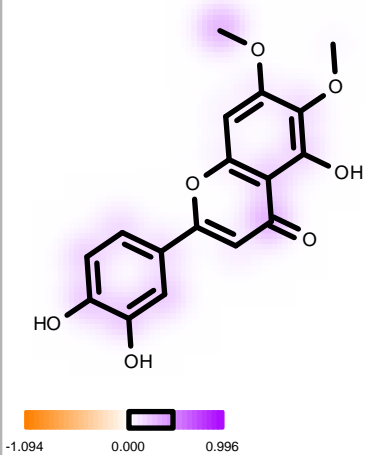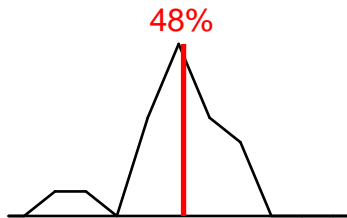

Ligand Desolvation      2.80

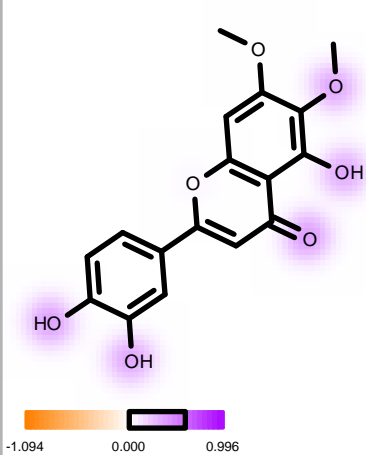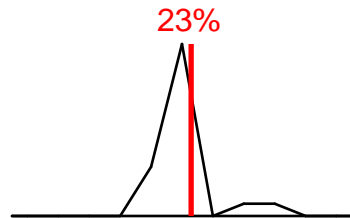

Acceptor      Donor  
Metal        Contact

Molecule Name omega\_1\_14  
Molecular Weight 330.3  
XLogP 1.2  
PSA 109.4  
Heavy Atoms 24  
Acceptor Count 7  
Donor Count 3  
Chelator Count 3  
Pose Index 11

Total Score -9.95

Score compared to other molecules

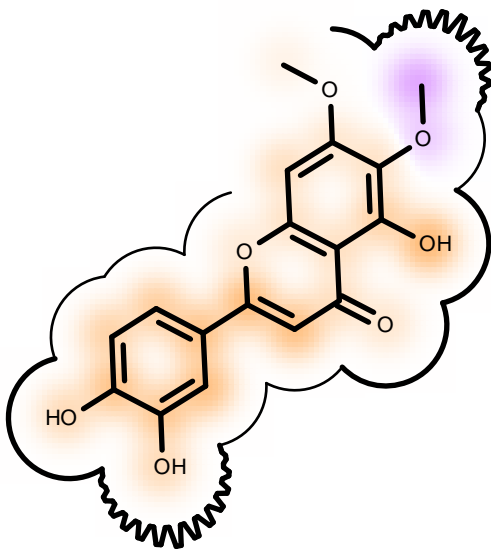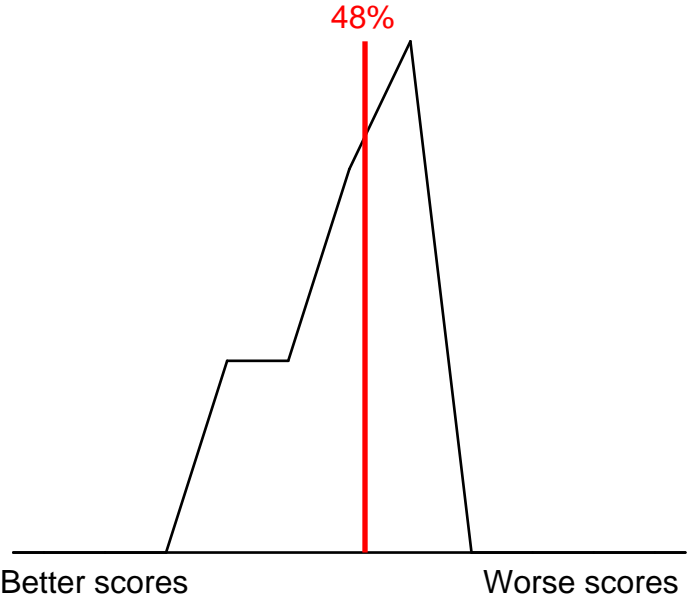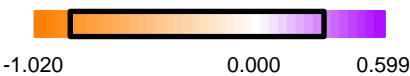

Protein Contact

Protein Cavity

Residue Fingerprint

|                |                |
|----------------|----------------|
| ALA256G        | ALA278E        |
| ALA278F        | ALA293B        |
| ALA293C        | ALA336B        |
| ARG252G        | ARG279C        |
| ARG291B        | ASP316F        |
| ASP333B        | GLN255G        |
| <b>GLU264G</b> | <b>GLU292B</b> |
| GLU292C        | GLY290B        |
| GLY290C        | ILE263G        |
| ILE338C        | <b>LYS260G</b> |
| PRO276F        | PRO289C        |
| SER267G        | SER277F        |
| THR259G        | TYR294C        |
| VAL279E        | VAL279F        |

Shape -14.31

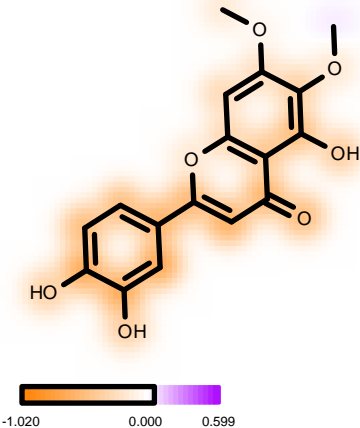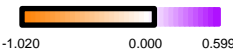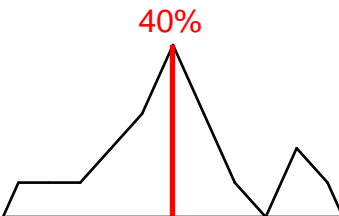

Hydrogen Bond -1.77

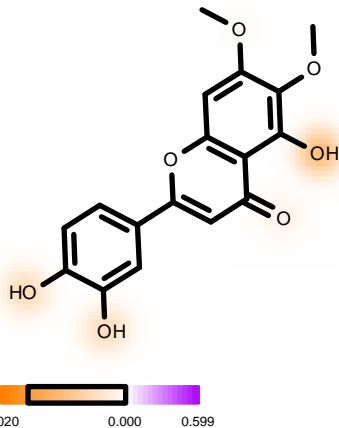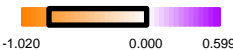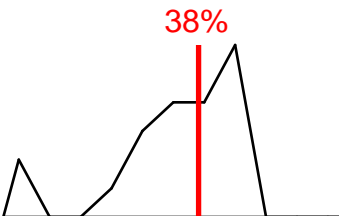

Protein Desolvation 3.48

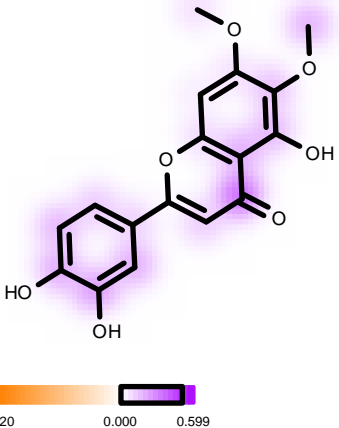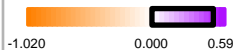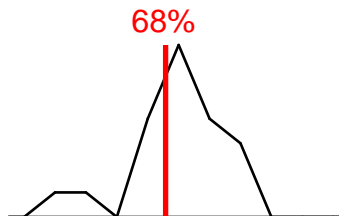

Ligand Desolvation 2.66

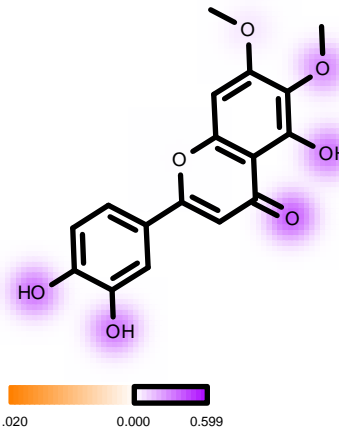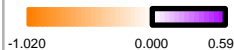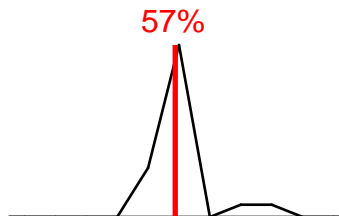

Acceptor  
Metal

Donor  
Contact

Molecule Name omega\_1\_13  
Molecular Weight 330.3  
XLogP 1.2  
PSA 109.4  
Heavy Atoms 24  
Acceptor Count 7  
Donor Count 3  
Chelator Count 3  
Pose Index 12

Total Score -9.87

Score compared to other molecules

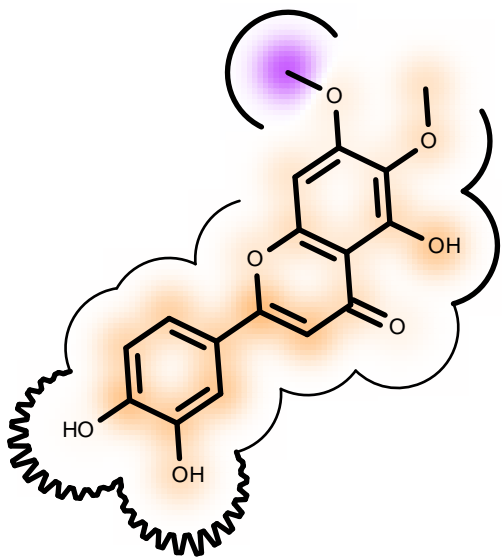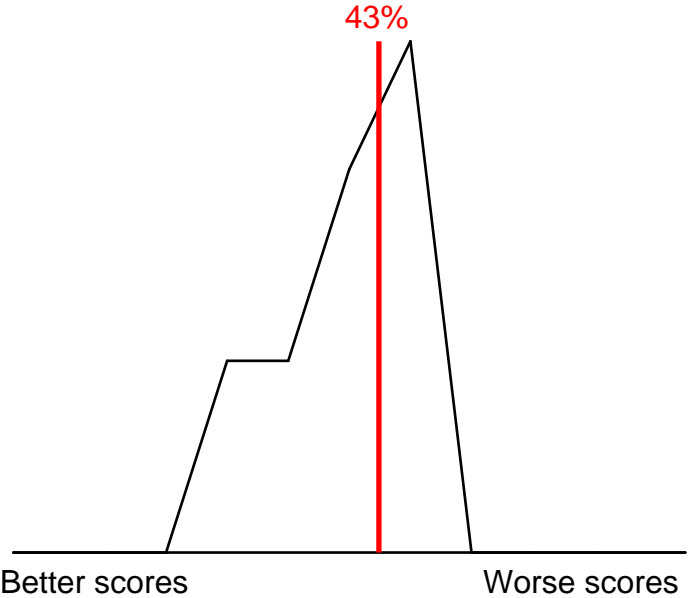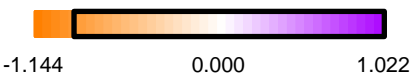

Protein Contact Protein Cavity

Residue Fingerprint

|                |                |
|----------------|----------------|
| ALA256G        | ALA278E        |
| ALA278F        | ALA293B        |
| ALA293C        | ALA336B        |
| ARG252G        | ARG279C        |
| ARG291B        | ASP316F        |
| ASP333B        | GLN255G        |
| <b>GLU264G</b> | <b>GLU292B</b> |
| GLU292C        | GLY290B        |
| GLY290C        | ILE263G        |
| ILE338C        | <b>LYS260G</b> |
| PRO276F        | PRO289C        |
| SER267G        | SER277F        |
| THR259G        | TYR294C        |
| VAL279E        | VAL279F        |

Shape -13.93

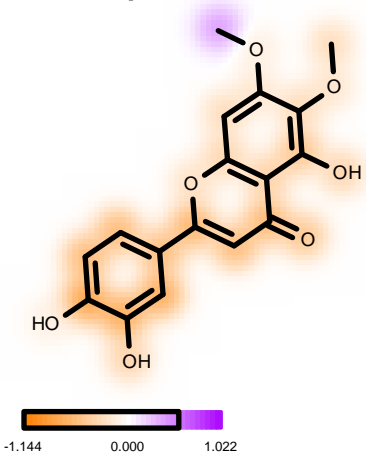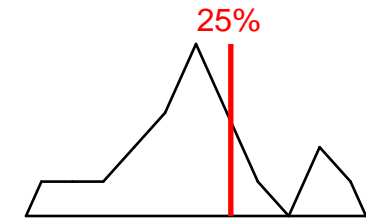

Hydrogen Bond -2.32

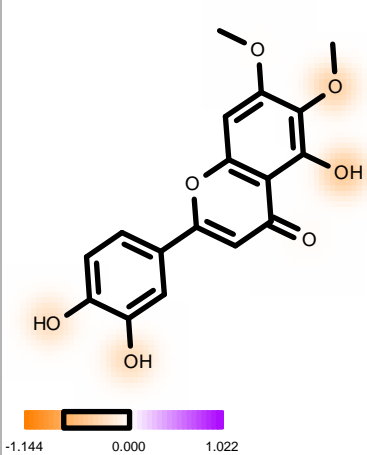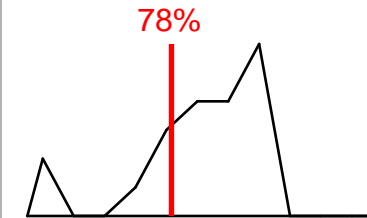

Protein Desolvation 3.64

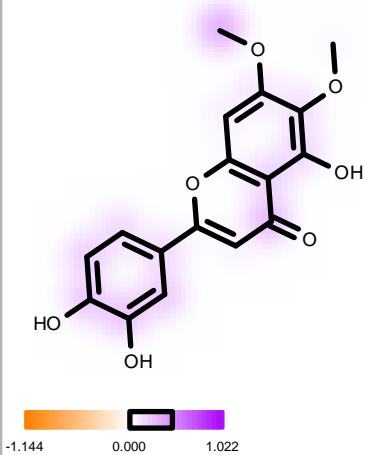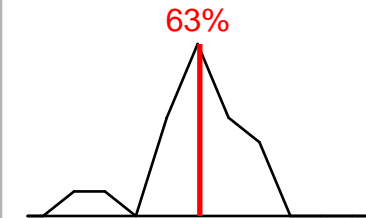

Ligand Desolvation 2.74

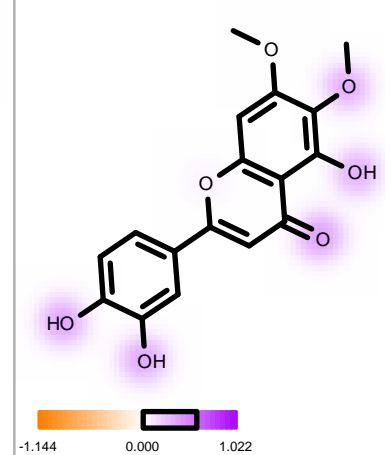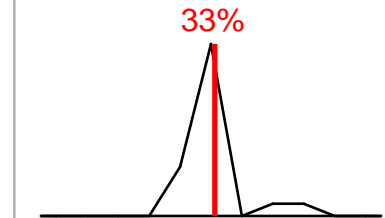

Acceptor Donor  
Metal Contact

Molecule Name      omega\_1\_1  
Molecular Weight    330.3  
XLogP                1.2  
PSA                  109.4  
Heavy Atoms        24  
Acceptor Count     7  
Donor Count        3  
Chelator Count     3  
Pose Index          13

Total Score      -9.86

Score compared to other molecules

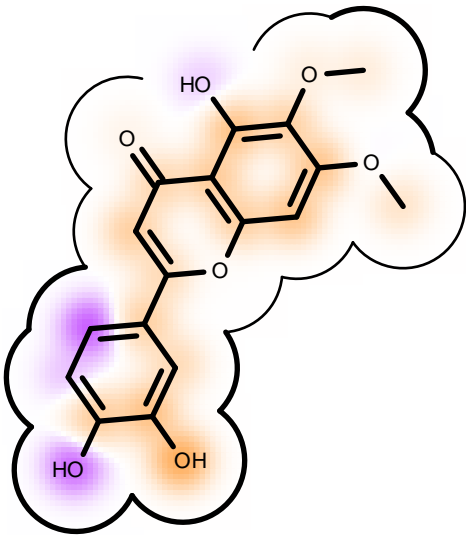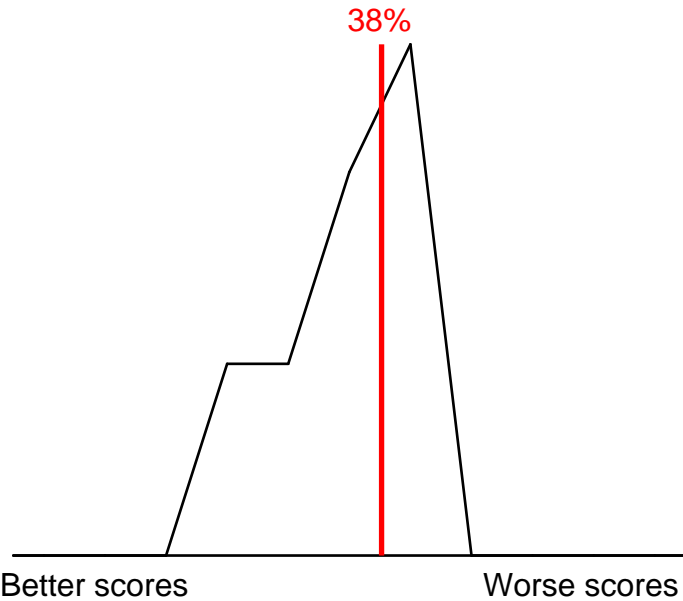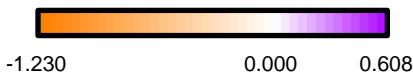

Protein Contact

Protein Cavity

Residue Fingerprint

|                |         |
|----------------|---------|
| ALA256G        | ALA278E |
| ALA278F        | ALA293B |
| ALA293C        | ALA336B |
| ARG252G        | ARG279C |
| ARG291B        | ASP316F |
| ASP333B        | GLN255G |
| <b>GLU264G</b> | GLU292B |
| GLU292C        | GLY290B |
| GLY290C        | ILE263G |
| ILE338C        | LYS260G |
| PRO276F        | PRO289C |
| <b>SER267G</b> | SER277F |
| THR259G        | TYR294C |
| VAL279E        | VAL279F |

Shape      -15.44

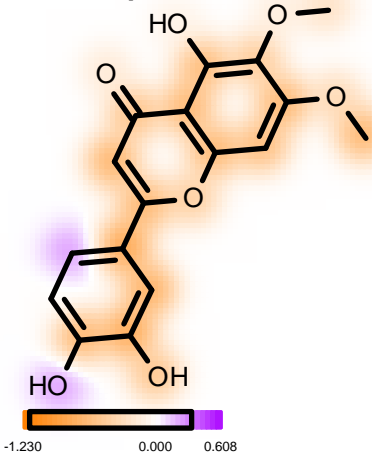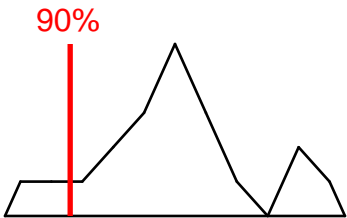

Hydrogen Bond      -1.39

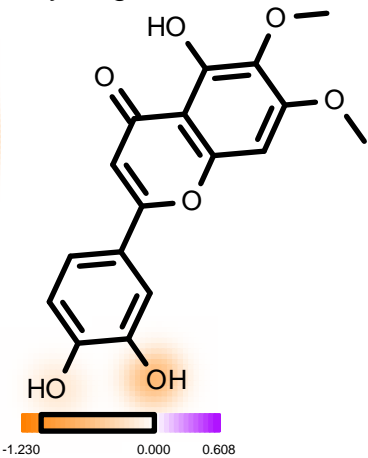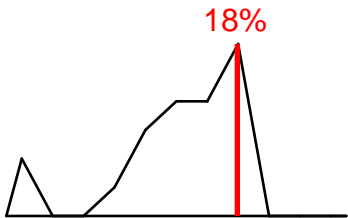

Protein Desolvation      4.26

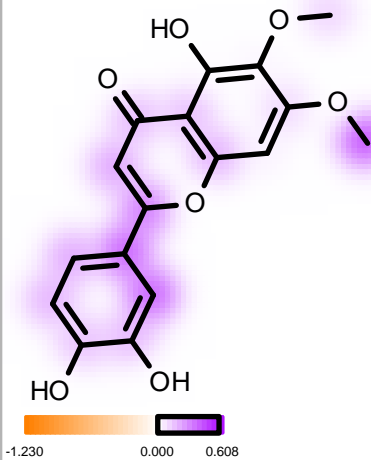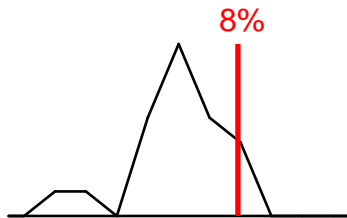

Ligand Desolvation      2.71

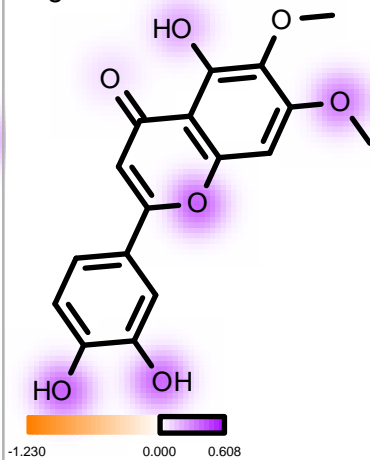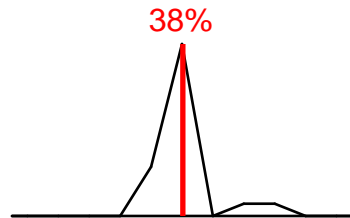

Acceptor      Donor  
Metal      Contact

Molecule Name      omega\_1\_16  
Molecular Weight    330.3  
XLogP                1.2  
PSA                  109.4  
Heavy Atoms        24  
Acceptor Count     7  
Donor Count        3  
Chelator Count     3  
Pose Index          14

Total Score      -9.84      Score compared to other molecules

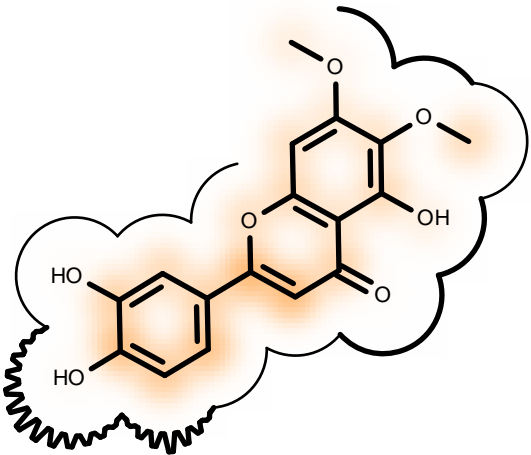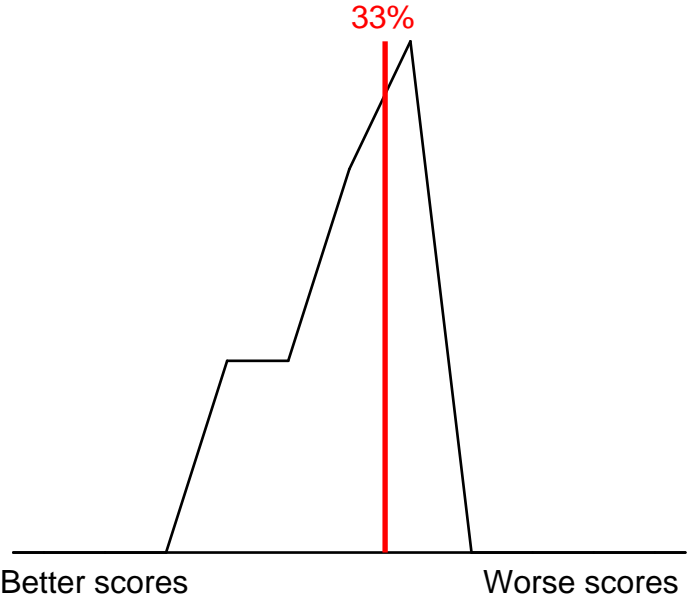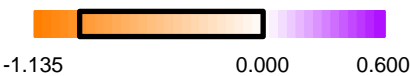

Protein Contact      Protein Cavity

Residue Fingerprint

|                |                |
|----------------|----------------|
| ALA256G        | ALA278E        |
| ALA278F        | ALA293B        |
| ALA293C        | ALA336B        |
| ARG252G        | ARG279C        |
| ARG291B        | ASP316F        |
| ASP333B        | GLN255G        |
| <b>GLU264G</b> | <b>GLU292B</b> |
| GLU292C        | GLY290B        |
| GLY290C        | ILE263G        |
| ILE338C        | LYS260G        |
| PRO276F        | PRO289C        |
| SER267G        | SER277F        |
| THR259G        | TYR294C        |
| VAL279E        | VAL279F        |

Shape      -14.49

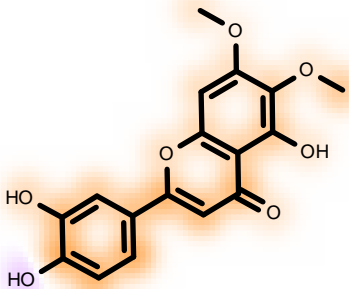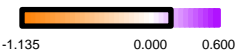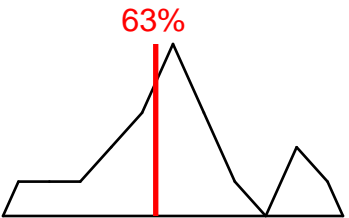

Hydrogen Bond      -1.86

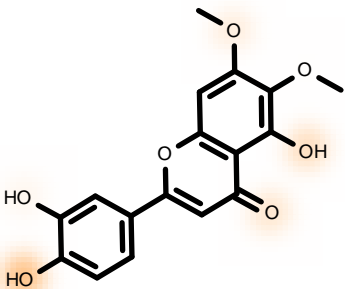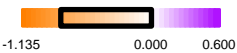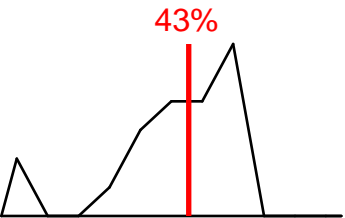

Protein Desolvation      3.65

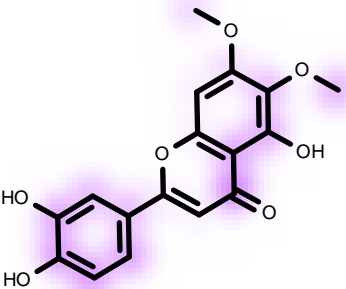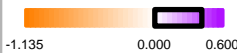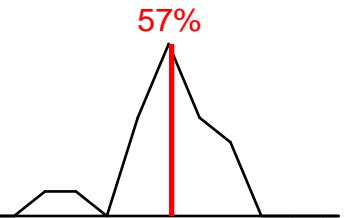

Ligand Desolvation      2.86

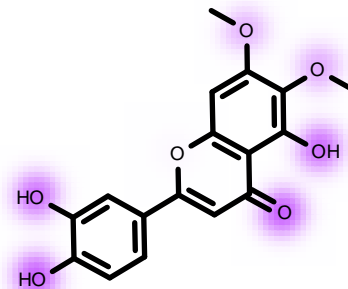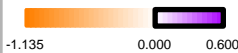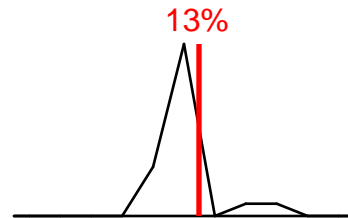

Acceptor      Donor  
Metal      Contact

Molecule Name      omega\_1\_16  
Molecular Weight    330.3  
XLogP                1.2  
PSA                  109.4  
Heavy Atoms        24  
Acceptor Count     7  
Donor Count        3  
Chelator Count     3  
Pose Index          15

Total Score      -9.75      Score compared to other molecules

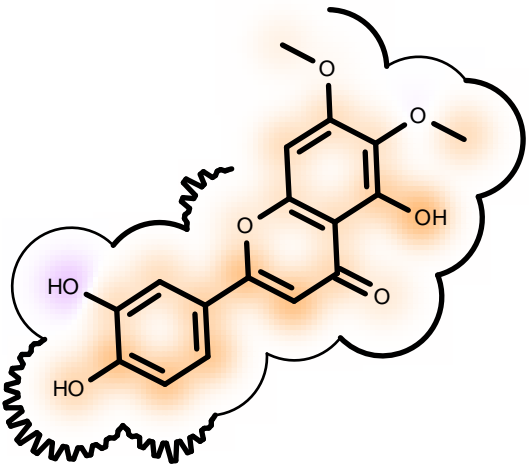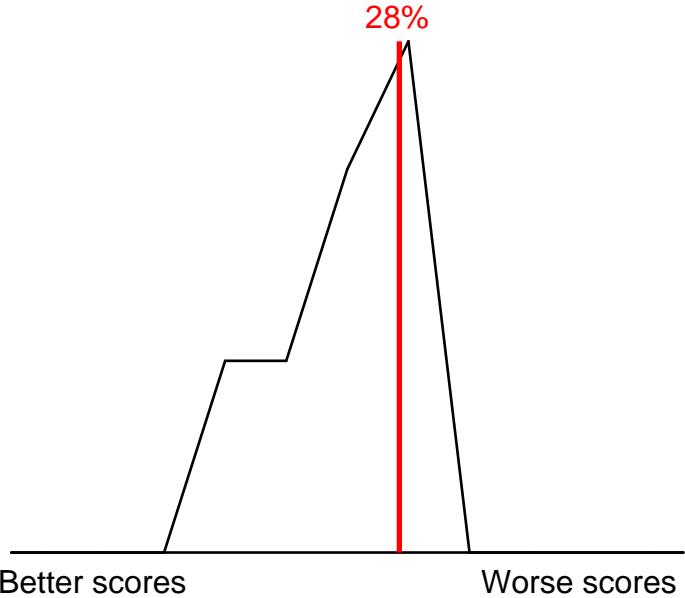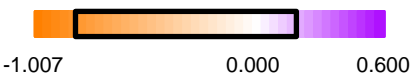

Protein Contact      Protein Cavity

Residue Fingerprint

|                |                |
|----------------|----------------|
| ALA256G        | ALA278E        |
| ALA278F        | ALA293B        |
| ALA293C        | ALA336B        |
| ARG252G        | ARG279C        |
| ARG291B        | ASP316F        |
| ASP333B        | GLN255G        |
| <b>GLU264G</b> | <b>GLU292B</b> |
| GLU292C        | GLY290B        |
| GLY290C        | ILE263G        |
| ILE338C        | LYS260G        |
| PRO276F        | PRO289C        |
| SER267G        | SER277F        |
| THR259G        | TYR294C        |
| VAL279E        | VAL279F        |

Shape      -14.01

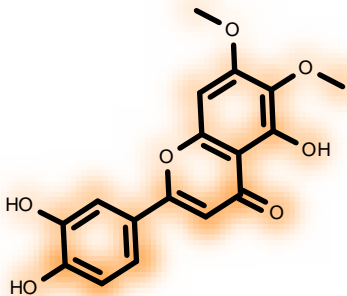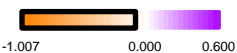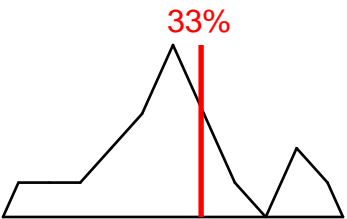

Hydrogen Bond      -1.58

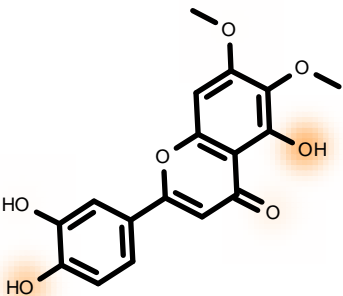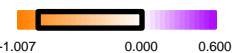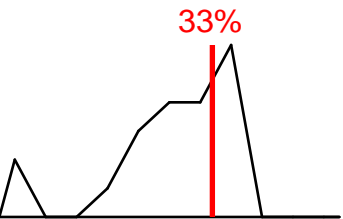

Protein Desolvation      3.28

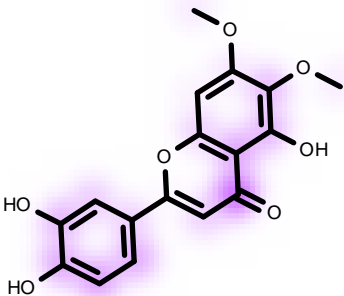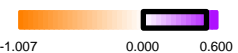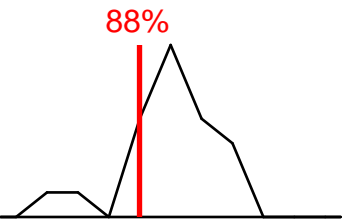

Ligand Desolvation      2.55

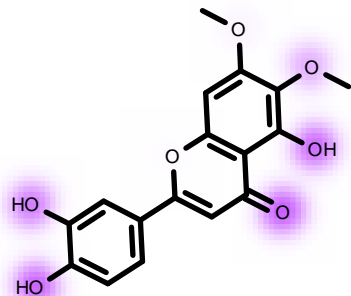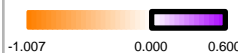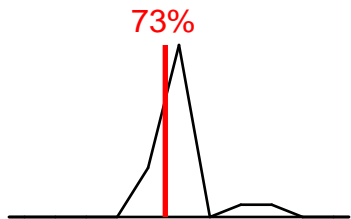

Acceptor      Donor  
Metal      Contact

Molecule Name omega\_1\_15  
Molecular Weight 330.3  
XLogP 1.2  
PSA 109.4  
Heavy Atoms 24  
Acceptor Count 7  
Donor Count 3  
Chelator Count 3  
Pose Index 16

Total Score -9.74

Score compared to other molecules

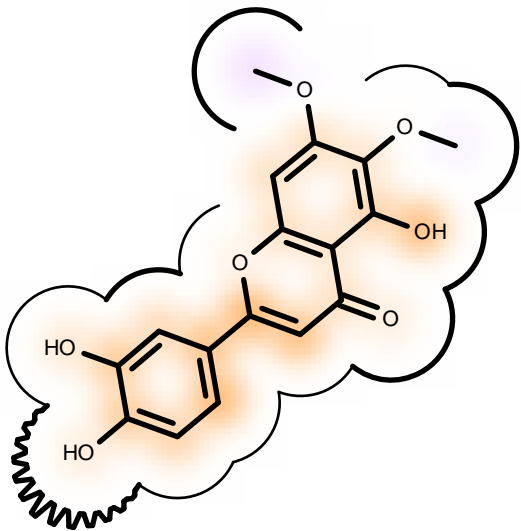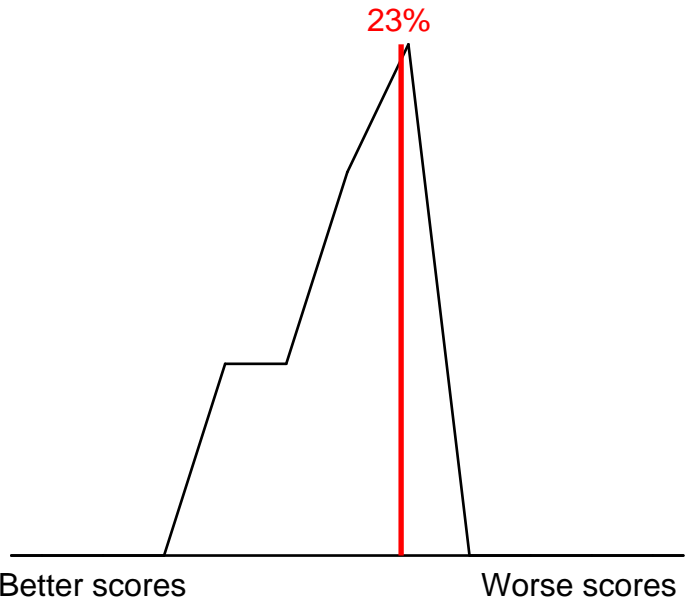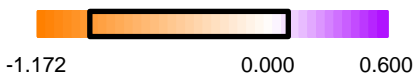

Protein Contact

Protein Cavity

Residue Fingerprint

|         |         |
|---------|---------|
| ALA256G | ALA278E |
| ALA278F | ALA293B |
| ALA293C | ALA336B |
| ARG252G | ARG279C |
| ARG291B | ASP316F |
| ASP333B | GLN255G |
| GLU264G | GLU292B |
| GLU292C | GLY290B |
| GLY290C | ILE263G |
| ILE338C | LYS260G |
| PRO276F | PRO289C |
| SER267G | SER277F |
| THR259G | TYR294C |
| VAL279E | VAL279F |

Shape -14.82

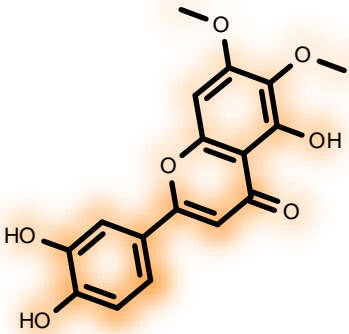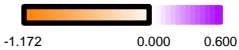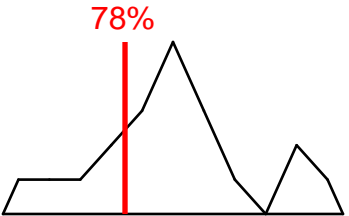

Hydrogen Bond -1.53

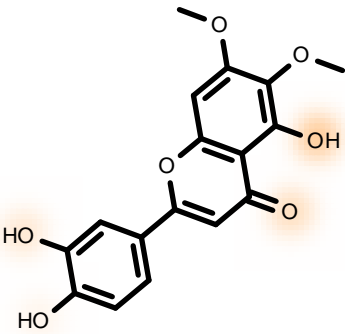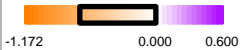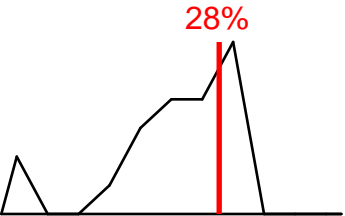

Protein Desolvation 3.98

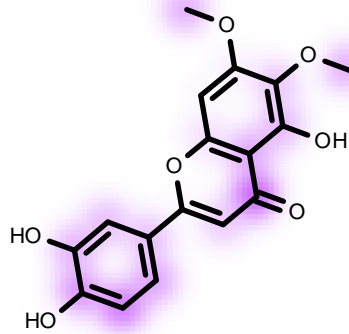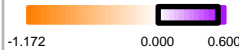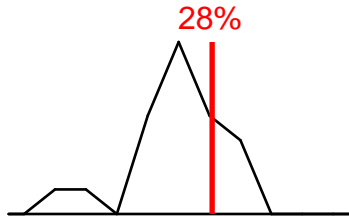

Ligand Desolvation 2.64

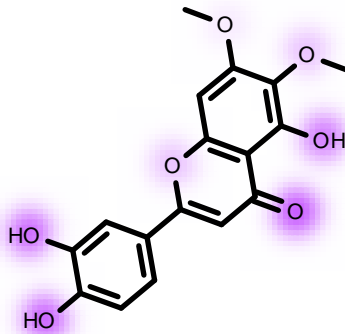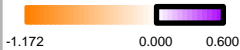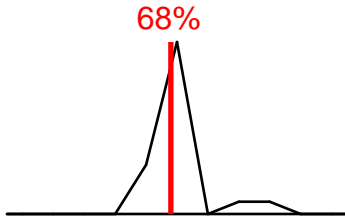

Acceptor  
Metal

Donor  
Contact



Molecule Name omega\_1\_13  
Molecular Weight 330.3  
XLogP 1.2  
PSA 109.4  
Heavy Atoms 24  
Acceptor Count 7  
Donor Count 3  
Chelator Count 3  
Pose Index 17

Total Score -9.72

Score compared to other molecules

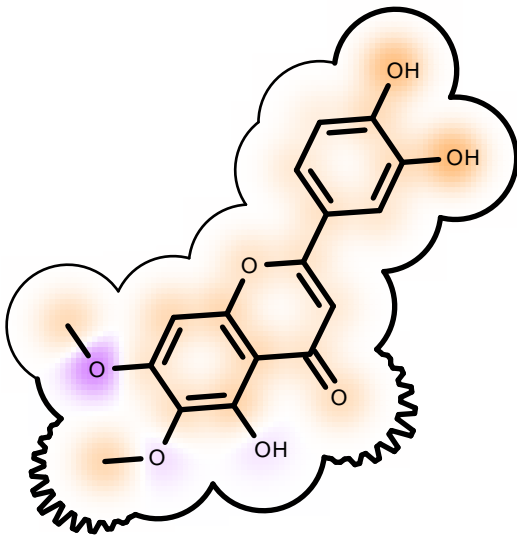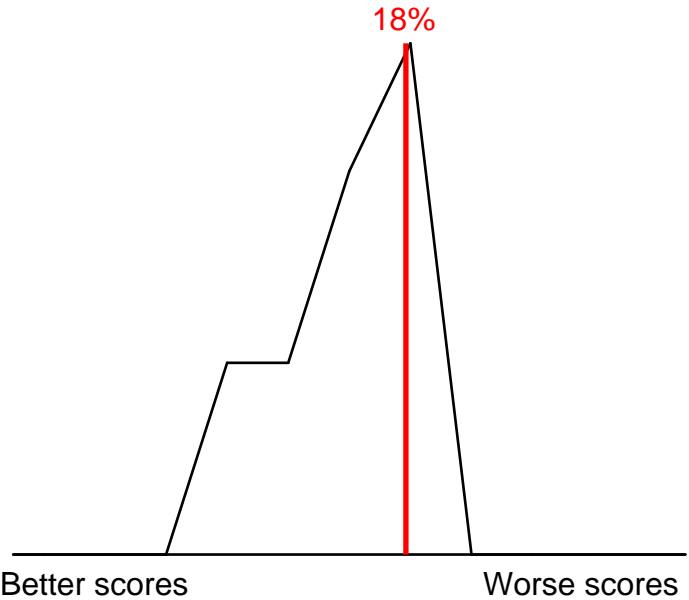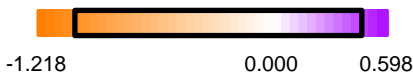

Protein Contact  Protein Cavity

Residue Fingerprint

|         |         |
|---------|---------|
| ALA256G | ALA278E |
| ALA278F | ALA293B |
| ALA293C | ALA336B |
| ARG252G | ARG279C |
| ARG291B | ASP316F |
| ASP333B | GLN255G |
| GLU264G | GLU292B |
| GLU292C | GLY290B |
| GLY290C | ILE263G |
| ILE338C | LYS260G |
| PRO276F | PRO289C |
| SER267G | SER277F |
| THR259G | TYR294C |
| VAL279E | VAL279F |

Shape -13.07

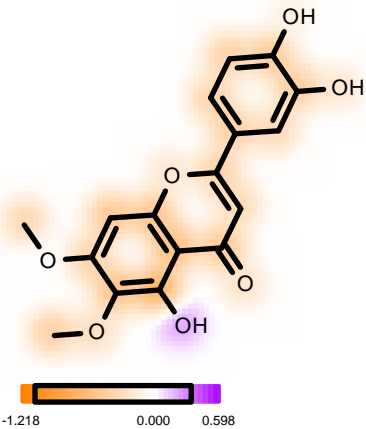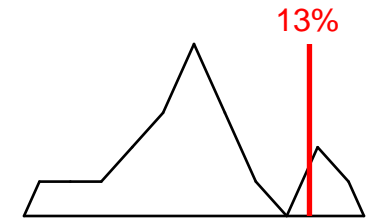

Hydrogen Bond -4.57

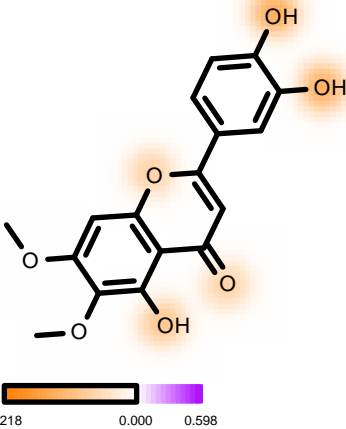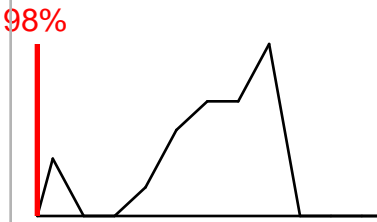

Protein Desolvation 4.24

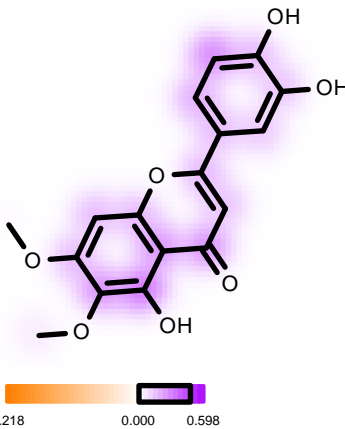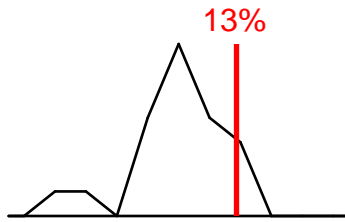

Ligand Desolvation 3.67

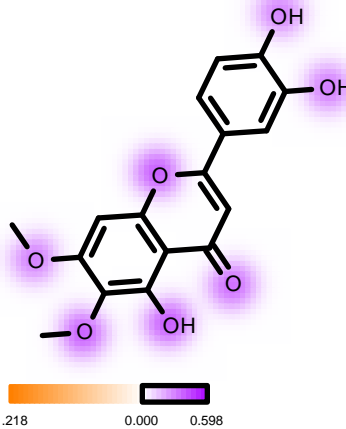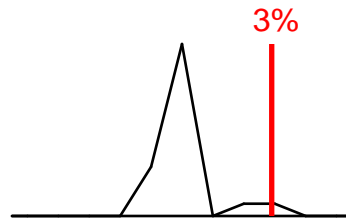

Acceptor Metal Donor Contact

Molecule Name omega\_1\_4  
Molecular Weight 330.3  
XLogP 1.2  
PSA 109.4  
Heavy Atoms 24  
Acceptor Count 7  
Donor Count 3  
Chelator Count 3  
Pose Index 18

Total Score -9.67

Score compared to other molecules

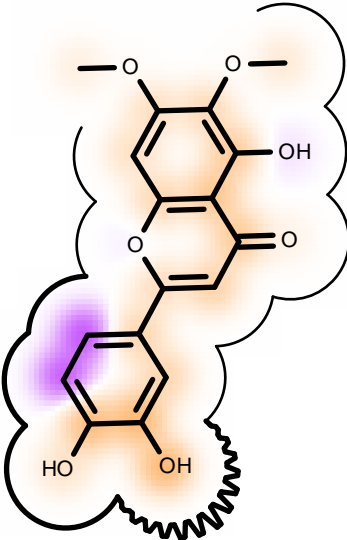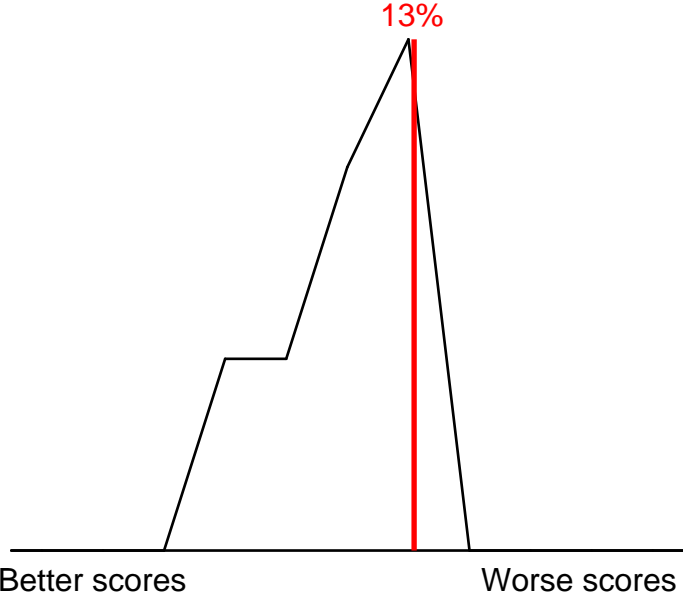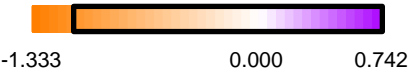

Protein Contact

Protein Cavity

Residue Fingerprint

|         |         |
|---------|---------|
| ALA256G | ALA278E |
| ALA278F | ALA293B |
| ALA293C | ALA336B |
| ARG252G | ARG279C |
| ARG291B | ASP316F |
| ASP333B | GLN255G |
| GLU264G | GLU292B |
| GLU292C | GLY290B |
| GLY290C | ILE263G |
| ILE338C | LYS260G |
| PRO276F | PRO289C |
| SER267G | SER277F |
| THR259G | TYR294C |
| VAL279E | VAL279F |

Shape -14.46

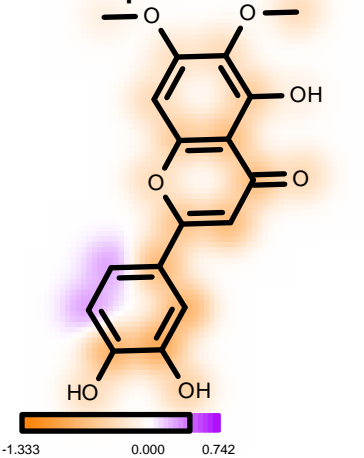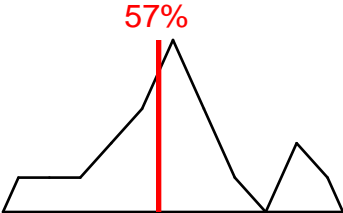

Hydrogen Bond -1.45

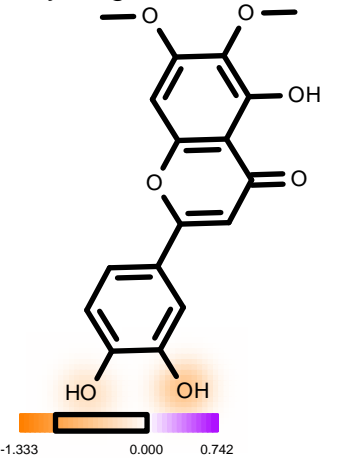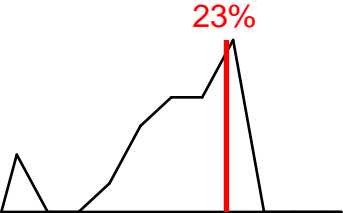

Protein Desolvation 3.75

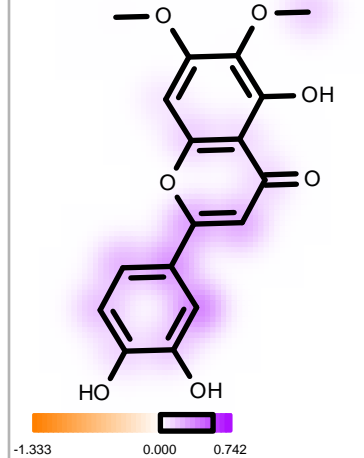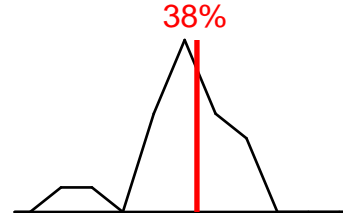

Ligand Desolvation 2.49

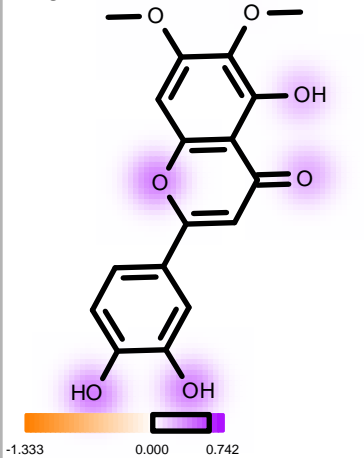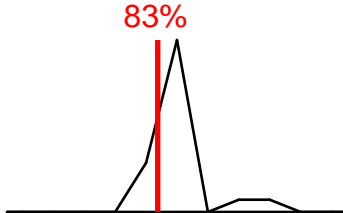

Acceptor  
Metal

Donor  
Contact

Molecule Name      omega\_1\_13  
Molecular Weight    330.3  
XLogP                1.2  
PSA                  109.4  
Heavy Atoms        24  
Acceptor Count     7  
Donor Count        3  
Chelator Count     3  
Pose Index          19

Total Score      -9.57      Score compared to other molecules

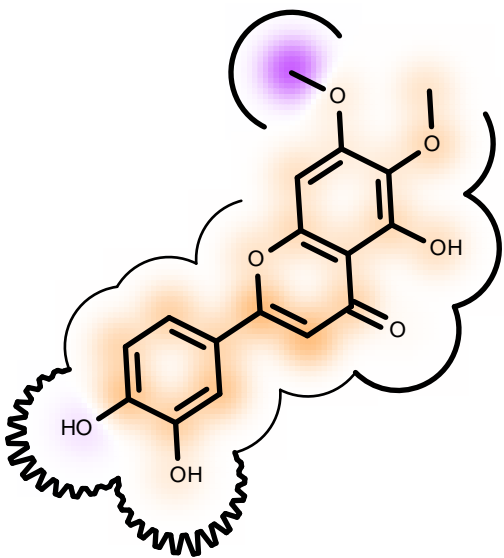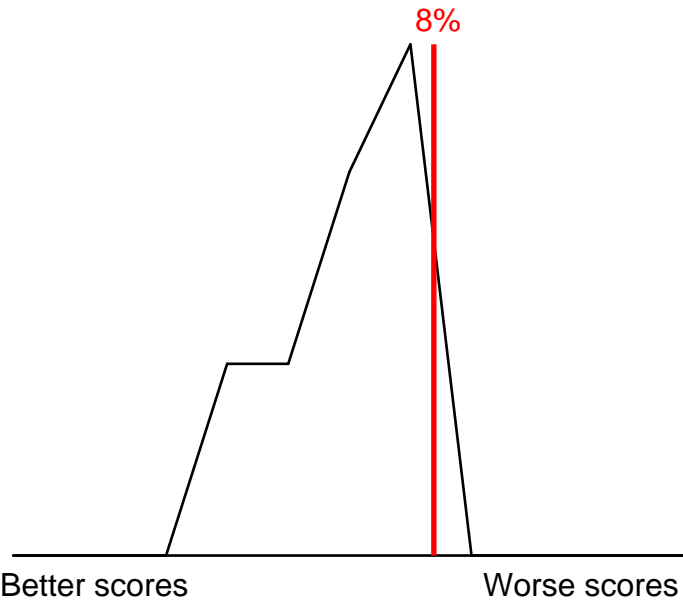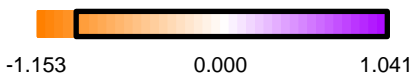

Protein Contact      Protein Cavity

Residue Fingerprint

|         |                |
|---------|----------------|
| ALA256G | ALA278E        |
| ALA278F | ALA293B        |
| ALA293C | ALA336B        |
| ARG252G | ARG279C        |
| ARG291B | ASP316F        |
| ASP333B | GLN255G        |
| GLU264G | <b>GLU292B</b> |
| GLU292C | GLY290B        |
| GLY290C | ILE263G        |
| ILE338C | <b>LYS260G</b> |
| PRO276F | PRO289C        |
| SER267G | SER277F        |
| THR259G | TYR294C        |
| VAL279E | VAL279F        |

Shape      -14.15

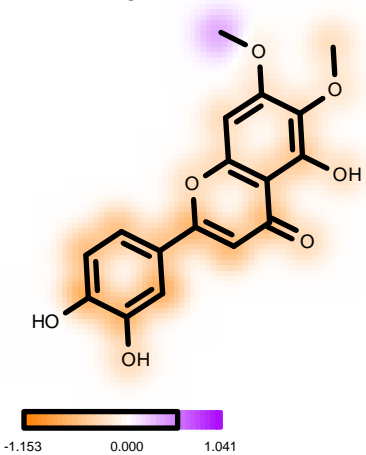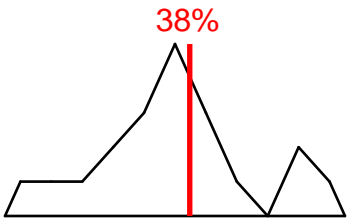

Hydrogen Bond      -2.09

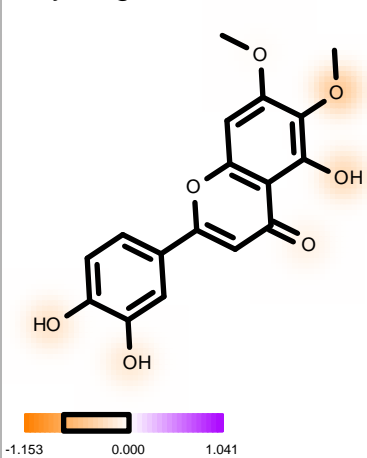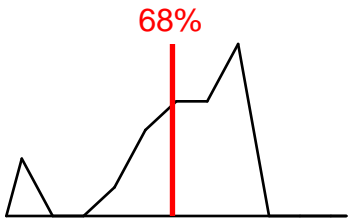

Protein Desolvation      3.85

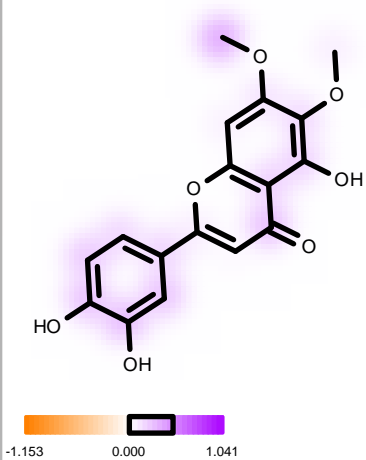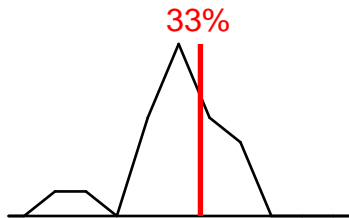

Ligand Desolvation      2.81

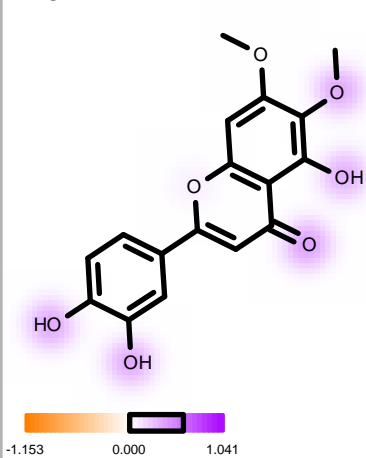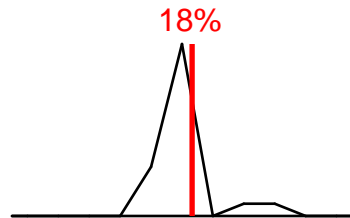

Acceptor      Donor  
Metal          Contact

Molecule Name      omega\_1\_2  
Molecular Weight    330.3  
XLogP                1.2  
PSA                  109.4  
Heavy Atoms        24  
Acceptor Count     7  
Donor Count        3  
Chelator Count     3  
Pose Index          20

Total Score      -9.54      Score compared to other molecules

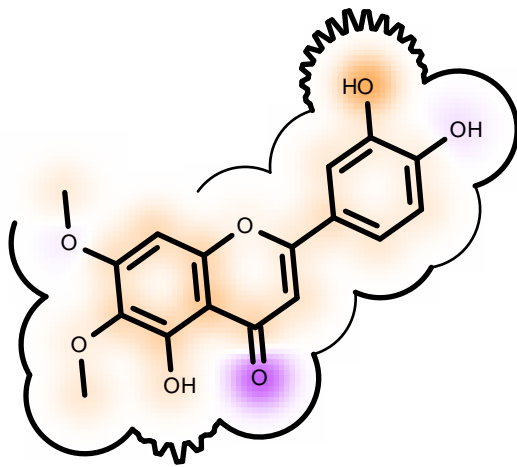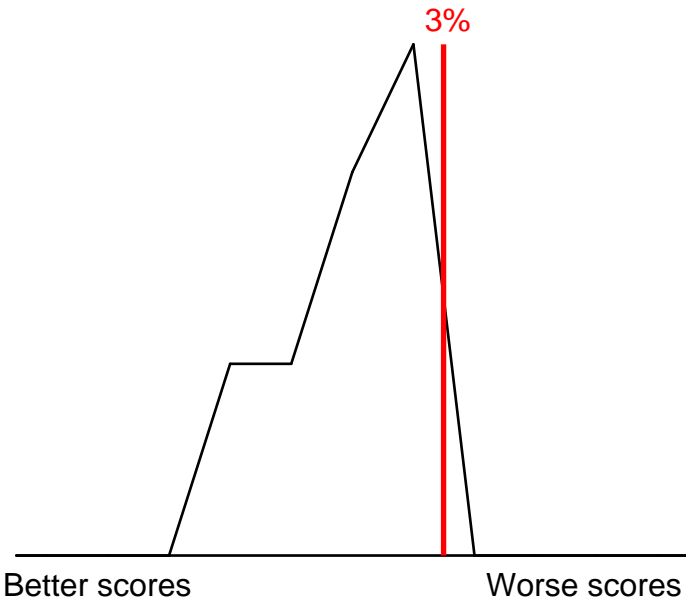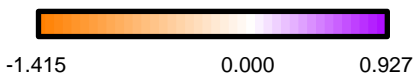

Protein Contact      Protein Cavity

Residue Fingerprint

|         |         |
|---------|---------|
| ALA256G | ALA278E |
| ALA278F | ALA293B |
| ALA293C | ALA336B |
| ARG252G | ARG279C |
| ARG291B | ASP316F |
| ASP333B | GLN255G |
| GLU264G | GLU292B |
| GLU292C | GLY290B |
| GLY290C | ILE263G |
| ILE338C | LYS260G |
| PRO276F | PRO289C |
| SER267G | SER277F |
| THR259G | TYR294C |
| VAL279E | VAL279F |

Shape      -13.50

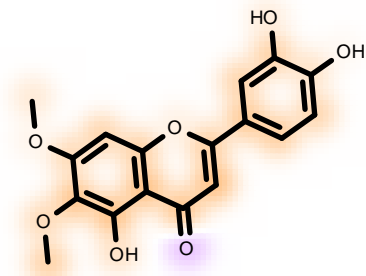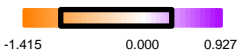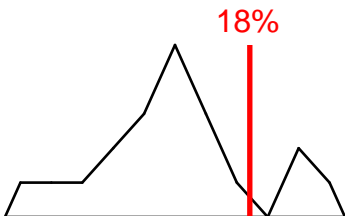

Hydrogen Bond      -1.97

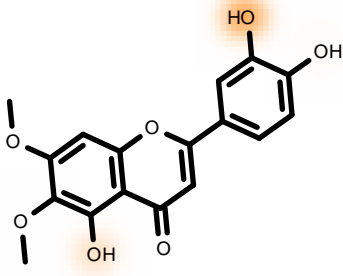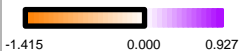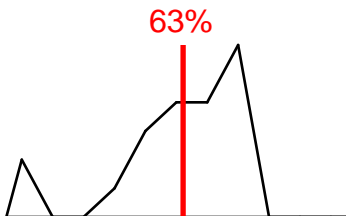

Protein Desolvation      3.67

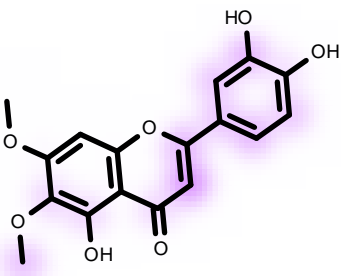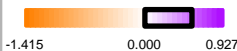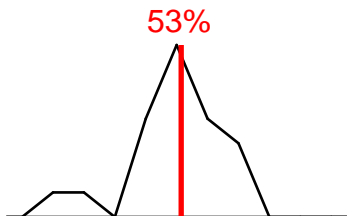

Ligand Desolvation      2.27

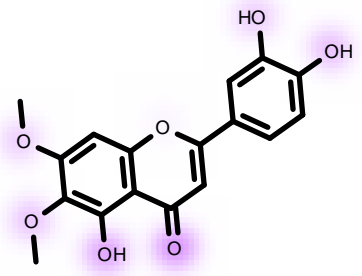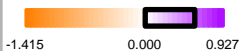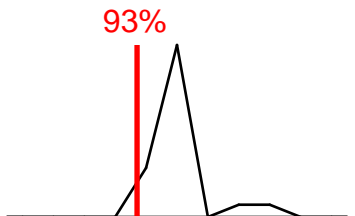

Acceptor      Donor  
Metal      Contact
